# Supplementary material for: Exploring the gut virome in fecal immunochemical test stool samples reveals novel associations with lifestyle in a large population-based study
Source: Research Square preprint supplement (doi:10.21203/rs.3.rs-3295571/v1), 2023-09-18
Supplement: Supplementary file 2 [file d1fb741bff57f96aa8b92332.xlsx]

## Sheet: Suppplmentary Table 4a
Suppplmentary Table 4a: Host variable associations with gut virome alpha diversity
index	host variable	n	df	sumsq	meansq	Omega2_partial	p.value	FDR
invsimpson	Sex	1034	1	7964	7964	0.003386	0.03388	0.04982
observed	Sex	1034	1	6957	6957	0.001044	0.1495	0.1823
shannon	Sex	1034	1	0.7343	0.7343	0.003144	0.03924	0.0545
invsimpson	Age	1034	2	1891	945.6	0	0.5866	0.6111
observed	Age	1034	2	16540	8272	0.002839	0.0849	0.1117
shannon	Age	1034	2	0.6809	0.3405	0.001876	0.1398	0.1664
invsimpson	Center	1034	1	14140	14140	0.006765	0.004658	0.008318
observed	Center	1034	1	10420	10420	0.002047	0.0776	0.1049
shannon	Center	1034	1	0.8567	0.8567	0.003834	0.02587	0.03919
invsimpson	BMI	623	1	2804	2804	9.074e-4	0.2113	0.2641
observed	BMI	623	1	4586	4586	4.785e-4	0.255	0.2965
shannon	BMI	623	1	0.04004	0.04004	0	0.6464	0.6877
invsimpson	Physical activity	728	1	18200	18200	0.01233	0.001557	0.002994
observed	Physical activity	728	1	64300	64300	0.02344	1.957e-5	3.764e-5
shannon	Physical activity	728	1	3.206	3.206	0.02221	3.17e-5	6.096e-5
invsimpson	Smoking	1013	1	677	677	0	0.5371	0.5714
observed	Smoking	1013	1	18400	18400	0.004415	0.0193	0.03016
shannon	Smoking	1013	1	0.1433	0.1433	0	0.3646	0.4143
invsimpson	Snus	971	1	1263	1263	0	0.3981	0.4629
observed	Snus	971	1	4722	4722	4.117e-4	0.237	0.2822
shannon	Snus	971	1	0.07018	0.07018	0	0.5218	0.5798
invsimpson	Education	1008	2	6286	3143	0.001532	0.1703	0.2241
observed	Education	1008	2	19850	9925	0.003889	0.05187	0.07205
shannon	Education	1008	2	0.8065	0.4032	0.002609	0.09896	0.1269
invsimpson	Marital status	1013	1	10240	10240	0.004715	0.01621	0.02702
observed	Marital status	1013	1	55490	55490	0.01519	4.911e-5	9.094e-5
shannon	Marital status	1013	1	1.631	1.631	0.00824	0.002207	0.003806
invsimpson	Working status	1015	2	10820	5410	0.004059	0.04692	0.06703
observed	Working status	1015	2	21650	10820	0.004417	0.03912	0.05753
shannon	Working status	1015	2	1.052	0.5261	0.004009	0.04814	0.06334
invsimpson	Nationality	989	1	1623	1623	0	0.3391	0.4037
observed	Nationality	989	1	19930	19930	0.00501	0.01464	0.02362
shannon	Nationality	989	1	1.569	1.569	0.008071	0.002697	0.004495
invsimpson	Energy (kcal/day)	630	1	2054	2054	3.015e-4	0.2757	0.3363
observed	Energy (kcal/day)	630	1	900	900	0	0.6041	0.6426
shannon	Energy (kcal/day)	630	1	0.3692	0.3692	0.002027	0.1316	0.1605
invsimpson	Protein (E%)	630	1	1045	1045	0	0.4432	0.4925
observed	Protein (E%)	630	1	1515	1515	0	0.4977	0.541
shannon	Protein (E%)	630	1	7.915e-4	7.915e-4	0	0.9474	0.9474
invsimpson	Carbohydrates (E%)	630	1	11200	11200	0.008565	0.01138	0.01962
observed	Carbohydrates (E%)	630	1	39650	39650	0.01666	6.759e-4	0.001207
shannon	Carbohydrates (E%)	630	1	2.033	2.033	0.0163	7.636e-4	0.001363
invsimpson	Added sugar (E%)	630	1	6369	6369	0.004136	0.05767	0.0801
observed	Added sugar (E%)	630	1	14330	14330	0.005531	0.03421	0.05183
shannon	Added sugar (E%)	630	1	0.7443	0.7443	0.005917	0.02968	0.04364
invsimpson	Fiber (g/day)	634	1	1257	1257	0	0.4087	0.4645
observed	Fiber (g/day)	634	1	38.71	38.71	0	0.9153	0.9153
shannon	Fiber (g/day)	634	1	0.002107	0.002107	0	0.9143	0.9329
invsimpson	Fat (E%)	630	1	3079	3079	0.001193	0.1861	0.2385
observed	Fat (E%)	630	1	8223	8223	0.002229	0.1212	0.1516
shannon	Fat (E%)	630	1	0.4712	0.4712	0.002675	0.1015	0.1269
invsimpson	SFA (E%)	630	1	304.1	304.1	0	0.6811	0.6811
observed	SFA (E%)	630	1	1900	1900	0	0.4506	0.5006
shannon	SFA (E%)	630	1	0.1523	0.1523	0	0.3576	0.4143
invsimpson	MUFA (E%)	630	1	10260	10260	0.007276	0.01808	0.02825
observed	MUFA (E%)	630	1	24930	24930	0.009591	0.007904	0.01317
shannon	MUFA (E%)	630	1	1.301	1.301	0.009504	0.00815	0.01273
invsimpson	PUFA (E%)	630	1	4866	4866	0.0028	0.0966	0.1305
observed	PUFA (E%)	630	1	14360	14360	0.004927	0.04282	0.06117
shannon	PUFA (E%)	630	1	0.683	0.683	0.004691	0.04677	0.0632
invsimpson	TFA (E%)	630	1	1001	1001	0	0.4541	0.4936
observed	TFA (E%)	630	1	285.4	285.4	0	0.7707	0.8028
shannon	TFA (E%)	630	1	0.0572	0.0572	0	0.5694	0.6189
invsimpson	Alcohol (g/day)	634	1	15630	15630	0.01156	0.003856	0.007141
observed	Alcohol (g/day)	634	1	37570	37570	0.01499	0.00116	0.002
shannon	Alcohol (g/day)	634	1	2.703	2.703	0.02187	1.084e-4	2.007e-4
invsimpson	WCRF	615	1	492.9	492.9	0	0.5989	0.6111
observed	WCRF	615	1	170.8	170.8	0	0.8239	0.8408
shannon	WCRF	615	1	0.00251	0.00251	0	0.9079	0.9329
invsimpson	Antibiotics use	964	1	9941	9941	0.004774	0.01791	0.02825
observed	Antibiotics use	964	1	8825	8825	0.0017	0.1044	0.1339
shannon	Antibiotics use	964	1	1.241	1.241	0.00627	0.007915	0.01273
invsimpson	Antacid use	970	1	8391	8391	0.003882	0.02902	0.04397
observed	Antacid use	970	1	2726	2726	0	0.3669	0.4169
shannon	Antacid use	970	1	0.7855	0.7855	0.003623	0.03362	0.04803

## Sheet: Suppplmentary Table 4b
Suppplmentary Table 4b: Host variable associations with gut virome beta diversity
host variable	n	df	R2	parOmegaSq	p
Sex	1034	1	0.001976	0.001008	0.001
Age	1034	2	0.00244	5.044e-4	0.003
Region	1034	1	0.001599	6.308e-4	0.001
BMI	623	1	0.003451	0.001843	0.001
Physical activity	728	1	0.003303	0.001928	0.001
Smoking	1013	1	0.002776	0.001788	0.001
Snus	971	1	0.001209	1.78e-4	0.089
Education	1008	2	0.003136	0.001151	0.001
Marital status	1013	1	0.001484	4.958e-4	0.003
Working status	1015	2	0.003608	0.001637	0.001
Nationality	989	1	0.002425	0.001413	0.001
Energy (kcal/day)	630	1	0.002492	9.021e-4	0.003
Protein (E%)	630	1	0.001295	-2.943e-4	0.961
Carbohydrates (E%)	630	1	0.002136	5.459e-4	0.013
Added sugar (E%)	630	1	0.00177	1.799e-4	0.159
Fiber (g/day)	634	1	0.003711	0.002131	0.001
Fat (E%)	630	1	0.001562	-2.798e-5	0.515
SFA (E%)	630	1	0.001727	1.369e-4	0.217
MUFA (E%)	630	1	0.001937	3.472e-4	0.047
PUFA (E%)	630	1	0.001868	2.778e-4	0.064
TFA (E%)	630	1	0.001591	8.423e-7	0.453
Alcohol (g/day)	634	1	0.002878	0.0012979999999999999	0.001
HLI	615	1	0.004264	0.002635	0.001
Antibiotics use	964	1	0.001383	3.445e-4	0.018
Antacid use	970	1	0.001219	1.874e-4	0.072

## Sheet: Supplementary Table 4c
Supplementary Table 4c: Host variable associations with gut virus abundance
host variable	reference value	value	vOTU	log2FC	stderr	pval	qval	N	N.not.zero
Age	50-60	70-80	CRCbiome_vOTU11362	0.2787	0.08387	9.224e-4	0.06833	1034	105
Age	50-60	60-70	CRCbiome_vOTU18323	-0.42	0.1307	0.001353	0.08351	1034	153
Age	50-60	70-80	CRCbiome_vOTU14617	-0.4267	0.1383	0.002088	0.09457	1034	223
Age	50-60	60-70	CRCbiome_vOTU02714	-0.3944	0.1318	0.002845	0.1171	1034	160
Age	50-60	70-80	CRCbiome_vOTU13928	0.4026	0.1422	0.004737	0.1553	1034	289
Age	50-60	60-70	CRCbiome_vOTU14617	-0.3594	0.1332	0.007104	0.1799	1034	223
Age	50-60	60-70	CRCbiome_vOTU18294	0.4112	0.1517	0.006812	0.1799	1034	237
Age	50-60	70-80	CRCbiome_vOTU18323	-0.3581	0.1356	0.008422	0.1842	1034	153
Age	50-60	70-80	CRCbiome_vOTU11521	0.2371	0.09227	0.01032	0.2136	1034	119
Age	50-60	70-80	CRCbiome_vOTU00495	0.2654	0.1041	0.01092	0.2158	1034	126
Age	50-60	70-80	CRCbiome_vOTU06261	0.2854	0.112	0.01095	0.2158	1034	152
Age	50-60	70-80	CRCbiome_vOTU00108	0.5131	0.2063	0.01302	0.2291	1034	716
Age	50-60	70-80	CRCbiome_vOTU16948	-0.3629	0.1588	0.02254	0.296	1034	866
Age	50-60	70-80	CRCbiome_vOTU17495	-0.2875	0.1368	0.03582	0.3555	1034	183
Age	50-60	70-80	CRCbiome_vOTU02714	-0.2832	0.1368	0.03872	0.3658	1034	160
Age	50-60	60-70	CRCbiome_vOTU15475	0.172	0.08301	0.03856	0.3658	1034	108
Age	50-60	70-80	CRCbiome_vOTU00236	0.2122	0.1028	0.03929	0.3694	1034	128
Age	50-60	60-70	CRCbiome_vOTU13928	0.2778	0.137	0.04288	0.3764	1034	289
Age	50-60	70-80	CRCbiome_vOTU00076	0.3906	0.1946	0.04495	0.3768	1034	456
Age	50-60	70-80	CRCbiome_vOTU06695	0.2263	0.1119	0.04351	0.3768	1034	136
Age	50-60	70-80	CRCbiome_vOTU18478	-0.2937	0.147	0.04602	0.3768	1034	526
Age	50-60	70-80	CRCbiome_vOTU00409	0.2049	0.1043	0.04975	0.3803	1034	154
Age	50-60	70-80	CRCbiome_vOTU06365	-0.3352	0.1704	0.04944	0.3803	1034	870
Age	50-60	70-80	CRCbiome_vOTU08771	-0.2492	0.1273	0.05065	0.3828	1034	157
Age	50-60	70-80	CRCbiome_vOTU11327	-0.2989	0.1562	0.05602	0.3935	1034	541
Age	50-60	60-70	CRCbiome_vOTU12720	0.1924	0.101	0.0571	0.3937	1034	119
Age	50-60	60-70	CRCbiome_vOTU16623	0.162	0.08499	0.05695	0.3937	1034	152
Age	50-60	60-70	CRCbiome_vOTU06949	-0.2833	0.1512	0.06121	0.395	1034	446
Age	50-60	70-80	CRCbiome_vOTU12609	0.3735	0.2021	0.06492	0.4021	1034	688
Age	50-60	60-70	CRCbiome_vOTU13666	0.2526	0.1382	0.06787	0.4135	1034	390
Age	50-60	70-80	CRCbiome_vOTU09493	0.2148	0.1188	0.07096	0.4189	1034	168
Age	50-60	60-70	CRCbiome_vOTU04991	-0.1759	0.09868	0.07492	0.4267	1034	160
Age	50-60	70-80	CRCbiome_vOTU06201	-0.1576	0.08866	0.07572	0.4275	1034	106
Age	50-60	70-80	CRCbiome_vOTU06847	-0.2739	0.1545	0.07664	0.43120000000000003	1034	564
Age	50-60	60-70	CRCbiome_vOTU11150	0.2422	0.1374	0.07816	0.4334	1034	167
Age	50-60	70-80	CRCbiome_vOTU14044	-0.3079	0.1756	0.07982	0.44	1034	277
Age	50-60	70-80	CRCbiome_vOTU16433	0.1454	0.08406	0.08407	0.4526	1034	115
Age	50-60	60-70	CRCbiome_vOTU11327	-0.2574	0.1505	0.08759	0.4608	1034	541
Age	50-60	60-70	CRCbiome_vOTU14720	0.2332	0.1373	0.08974	0.4623	1034	372
Age	50-60	60-70	CRCbiome_vOTU02333	-0.2734	0.1624	0.09253	0.469	1034	250
Age	50-60	60-70	CRCbiome_vOTU14990	0.2021	0.1203	0.09319	0.469	1034	214
Age	50-60	70-80	CRCbiome_vOTU11150	0.2377	0.1426	0.09569	0.4769	1034	167
Age	50-60	60-70	CRCbiome_vOTU06847	-0.2464	0.1489	0.09829	0.4799	1034	564
Age	50-60	60-70	CRCbiome_vOTU17445	0.2424	0.1483	0.1026	0.4924	1034	482
Age	50-60	60-70	CRCbiome_vOTU08913	-0.1498	0.09215	0.1044	0.4964	1034	159
Age	50-60	60-70	CRCbiome_vOTU06261	0.1734	0.1079	0.1083	0.5048	1034	152
Age	50-60	70-80	CRCbiome_vOTU05693	0.3443	0.2149	0.1095	0.5055	1034	643
Age	50-60	70-80	CRCbiome_vOTU07167	-0.1564	0.09795	0.1106	0.5091	1034	123
Age	50-60	60-70	CRCbiome_vOTU14802	0.1731	0.1102	0.1166	0.5189	1034	174
Age	50-60	70-80	CRCbiome_vOTU18294	0.2442	0.1574	0.1211	0.523	1034	237
Age	50-60	60-70	CRCbiome_vOTU11362	0.1236	0.08082	0.1264	0.5271	1034	105
Age	50-60	60-70	CRCbiome_vOTU09838	0.2461	0.1614	0.1275	0.5294	1034	731
Age	50-60	60-70	CRCbiome_vOTU00579	0.1881	0.1243	0.1305	0.5332	1034	222
Age	50-60	60-70	CRCbiome_vOTU00738	-0.2003	0.1323	0.1302	0.5332	1034	140
Age	50-60	70-80	CRCbiome_vOTU12720	0.1581	0.1049	0.132	0.534	1034	119
Age	50-60	70-80	CRCbiome_vOTU06243	0.191	0.1283	0.137	0.5384	1034	127
Age	50-60	60-70	CRCbiome_vOTU00236	0.1454	0.09908	0.1425	0.5478	1034	128
Age	50-60	60-70	CRCbiome_vOTU00386	0.1763	0.1205	0.1436	0.5478	1034	130
Age	50-60	70-80	CRCbiome_vOTU11186	0.1507	0.103	0.1437	0.5478	1034	112
Age	50-60	70-80	CRCbiome_vOTU18455	-0.1809	0.1235	0.1431	0.5478	1034	125
Age	50-60	60-70	CRCbiome_vOTU00680	0.1598	0.1094	0.1443	0.548	1034	148
Age	50-60	70-80	CRCbiome_vOTU15475	0.1254	0.08615	0.1458	0.548	1034	108
Age	50-60	70-80	CRCbiome_vOTU06460	-0.1546	0.1074	0.1501	0.5549	1034	159
Age	50-60	70-80	CRCbiome_vOTU04840	-0.1256	0.08763	0.1519	0.5572	1034	175
Age	50-60	60-70	CRCbiome_vOTU07583	-0.2394	0.1674	0.153	0.5572	1034	686
Age	50-60	60-70	CRCbiome_vOTU00076	0.2618	0.1875	0.1629	0.565	1034	456
Age	50-60	70-80	CRCbiome_vOTU06961	-0.239	0.1716	0.1639	0.565	1034	256
Age	50-60	60-70	CRCbiome_vOTU06766	-0.1884	0.1364	0.1676	0.5666	1034	491
Age	50-60	60-70	CRCbiome_vOTU14742	0.2365	0.1713	0.1676	0.5666	1034	330
Age	50-60	60-70	CRCbiome_vOTU18494	-0.1819	0.1316	0.1672	0.5666	1034	210
Age	50-60	60-70	CRCbiome_vOTU16292	-0.219	0.1594	0.1697	0.5686	1034	615
Age	50-60	60-70	CRCbiome_vOTU14044	-0.2314	0.1692	0.1717	0.571	1034	277
Age	50-60	70-80	CRCbiome_vOTU08913	-0.1302	0.09564	0.1738	0.5768	1034	159
Age	50-60	60-70	CRCbiome_vOTU10475	0.1896	0.1402	0.1765	0.5806	1034	184
Age	50-60	60-70	CRCbiome_vOTU06206	0.1616	0.1205	0.1802	0.5818	1034	189
Age	50-60	70-80	CRCbiome_vOTU14017	0.1687	0.1253	0.1787	0.5818	1034	181
Age	50-60	60-70	CRCbiome_vOTU17495	-0.1765	0.1318	0.1808	0.5818	1034	183
Age	50-60	70-80	CRCbiome_vOTU00579	0.1706	0.129	0.1864	0.5911	1034	222
Age	50-60	70-80	CRCbiome_vOTU06766	-0.1842	0.1416	0.1936	0.6078	1034	491
Age	50-60	60-70	CRCbiome_vOTU00014	-0.1966	0.1517	0.1954	0.6083	1034	760
Age	50-60	60-70	CRCbiome_vOTU07045	0.1253	0.09755	0.1992	0.6141	1034	149
Age	50-60	70-80	CRCbiome_vOTU14163	0.2238	0.1748	0.2006	0.6141	1034	368
Age	50-60	60-70	CRCbiome_vOTU00108	0.2537	0.1987	0.202	0.6142	1034	716
Age	50-60	70-80	CRCbiome_vOTU07352	-0.2118	0.1685	0.209	0.6221	1034	387
Age	50-60	70-80	CRCbiome_vOTU16623	0.1112	0.0882	0.2078	0.6221	1034	152
Age	50-60	60-70	CRCbiome_vOTU18297	-0.1349	0.1102	0.2214	0.6423	1034	161
Age	50-60	70-80	CRCbiome_vOTU05594	-0.1293	0.1085	0.2336	0.646	1034	148
Age	50-60	70-80	CRCbiome_vOTU17670	0.1943	0.1626	0.2325	0.646	1034	231
Age	50-60	70-80	CRCbiome_vOTU00102	0.1736	0.1486	0.2431	0.6572	1034	216
Age	50-60	70-80	CRCbiome_vOTU00185	-0.1184	0.1021	0.2467	0.6614	1034	116
Age	50-60	60-70	CRCbiome_vOTU05051	0.1245	0.1079	0.2488	0.6614	1034	158
Age	50-60	70-80	CRCbiome_vOTU06193	-0.2639	0.2297	0.251	0.6614	1034	571
Age	50-60	60-70	CRCbiome_vOTU06460	-0.1191	0.1034	0.2499	0.6614	1034	159
Age	50-60	70-80	CRCbiome_vOTU06510	0.09825	0.08507	0.2484	0.6614	1034	118
Age	50-60	70-80	CRCbiome_vOTU10713	-0.1285	0.1122	0.2521	0.6614	1034	202
Age	50-60	60-70	CRCbiome_vOTU04186	-0.1113	0.09799	0.2561	0.6655	1034	126
Age	50-60	60-70	CRCbiome_vOTU15976	-0.1315	0.1157	0.2562	0.6655	1034	131
Age	50-60	70-80	CRCbiome_vOTU06383	0.1255	0.1113	0.2596	0.6707	1034	168
Age	50-60	70-80	CRCbiome_vOTU16923	0.1382	0.1241	0.2656	0.6798	1034	179
Age	50-60	60-70	CRCbiome_vOTU14163	0.1868	0.1684	0.2676	0.6808	1034	368
Age	50-60	70-80	CRCbiome_vOTU14802	0.1269	0.1144	0.2674	0.6808	1034	174
Age	50-60	60-70	CRCbiome_vOTU00185	-0.1086	0.0984	0.2699	0.6809	1034	116
Age	50-60	60-70	CRCbiome_vOTU06476	0.1975	0.179	0.2701	0.6809	1034	183
Age	50-60	60-70	CRCbiome_vOTU18092	-0.1319	0.121	0.2757	0.6845	1034	124
Age	50-60	60-70	CRCbiome_vOTU00912	-0.1769	0.1658	0.2862	0.6867	1034	383
Age	50-60	70-80	CRCbiome_vOTU06344	0.1375	0.1285	0.285	0.6867	1034	281
Age	50-60	60-70	CRCbiome_vOTU12833	0.2037	0.1892	0.282	0.6867	1034	573
Age	50-60	70-80	CRCbiome_vOTU14742	0.1917	0.1777	0.2811	0.6867	1034	330
Age	50-60	70-80	CRCbiome_vOTU15035	-0.1646	0.15310000000000001	0.2824	0.6867	1034	563
Age	50-60	60-70	CRCbiome_vOTU05990	-0.1327	0.126	0.2924	0.6942	1034	166
Age	50-60	60-70	CRCbiome_vOTU15587	-0.1747	0.1664	0.2938	0.6967	1034	302
Age	50-60	60-70	CRCbiome_vOTU07437	0.1151	0.1116	0.3025	0.7053	1034	171
Age	50-60	60-70	CRCbiome_vOTU09493	0.1175	0.1145	0.3049	0.7067	1034	168
Age	50-60	60-70	CRCbiome_vOTU05899	-0.1407	0.1381	0.3085	0.7069	1034	158
Age	50-60	60-70	CRCbiome_vOTU00018	0.2018	0.2027	0.3197	0.7085	1034	316
Age	50-60	70-80	CRCbiome_vOTU00160	0.07894	0.07882	0.3168	0.7085	1034	106
Age	50-60	70-80	CRCbiome_vOTU04991	-0.1023	0.1024	0.318	0.7085	1034	160
Age	50-60	70-80	CRCbiome_vOTU06524	0.1359	0.1367	0.3206	0.7085	1034	206
Age	50-60	60-70	CRCbiome_vOTU12609	0.1948	0.1947	0.3174	0.7085	1034	688
Age	50-60	60-70	CRCbiome_vOTU18353	-0.2064	0.2056	0.3155	0.7085	1034	715
Age	50-60	70-80	CRCbiome_vOTU14990	0.1224	0.1248	0.3268	0.7172	1034	214
Age	50-60	70-80	CRCbiome_vOTU11017	-0.1485	0.1524	0.33	0.7186	1034	317
Age	50-60	60-70	CRCbiome_vOTU05594	-0.1003	0.1045	0.3373	0.7271	1034	148
Age	50-60	60-70	CRCbiome_vOTU00495	0.09602	0.1003	0.3386	0.7276	1034	126
Age	50-60	70-80	CRCbiome_vOTU01854	0.1534	0.1611	0.3414	0.7305	1034	608
Age	50-60	60-70	CRCbiome_vOTU05693	0.1936	0.2071	0.3501	0.7327	1034	643
Age	50-60	70-80	CRCbiome_vOTU10475	0.136	0.1455	0.35	0.7327	1034	184
Age	50-60	60-70	CRCbiome_vOTU06796	0.09098	0.09912	0.3589	0.737	1034	135
Age	50-60	70-80	CRCbiome_vOTU06890	0.1401	0.1541	0.3634	0.73740000000000006	1034	238
Age	50-60	60-70	CRCbiome_vOTU07167	-0.08466	0.09438	0.3699	0.73740000000000006	1034	123
Age	50-60	60-70	CRCbiome_vOTU11017	0.1318	0.1468	0.3696	0.73740000000000006	1034	317
Age	50-60	70-80	CRCbiome_vOTU12833	0.1759	0.1964	0.3707	0.73740000000000006	1034	573
Age	50-60	70-80	CRCbiome_vOTU16396	0.09682	0.1068	0.365	0.73740000000000006	1034	124
Age	50-60	70-80	CRCbiome_vOTU15587	-0.1529	0.1726	0.3761	0.7434	1034	302
Age	50-60	60-70	CRCbiome_vOTU06201	-0.07457	0.08543	0.383	0.7521	1034	106
Age	50-60	70-80	CRCbiome_vOTU15976	-0.1041	0.1201	0.3863	0.7564	1034	131
Age	50-60	70-80	CRCbiome_vOTU06407	-0.1647	0.1918	0.3908	0.7587	1034	306
Age	50-60	60-70	CRCbiome_vOTU10262	-0.1429	0.1675	0.3939	0.7606	1034	419
Age	50-60	70-80	CRCbiome_vOTU10907	0.1446	0.1698	0.3947	0.7606	1034	337
Age	50-60	60-70	CRCbiome_vOTU06695	0.09101	0.1079	0.399	0.764	1034	136
Age	50-60	60-70	CRCbiome_vOTU06383	0.09008	0.1072	0.4009	0.7654	1034	168
Age	50-60	70-80	CRCbiome_vOTU06625	-0.1529	0.1835	0.4051	0.7695	1034	318
Age	50-60	60-70	CRCbiome_vOTU02518	-0.141	0.1701	0.4075	0.7707	1034	529
Age	50-60	60-70	CRCbiome_vOTU17423	0.09534	0.1151	0.4076	0.7707	1034	180
Age	50-60	70-80	CRCbiome_vOTU06206	0.1031	0.1251	0.4099	0.7724	1034	189
Age	50-60	60-70	CRCbiome_vOTU02986	-0.06394	0.07831	0.4144	0.7753	1034	117
Age	50-60	60-70	CRCbiome_vOTU04155	-0.09279	0.1145	0.4179	0.7771	1034	154
Age	50-60	70-80	CRCbiome_vOTU06476	0.1504	0.1857	0.4182	0.7771	1034	183
Age	50-60	60-70	CRCbiome_vOTU06779	0.1425	0.177	0.421	0.7806	1034	252
Age	50-60	60-70	CRCbiome_vOTU18455	-0.09563	0.119	0.4217	0.7809	1034	125
Age	50-60	70-80	CRCbiome_vOTU07549	-0.07123	0.08973	0.4275	0.7867	1034	124
Age	50-60	60-70	CRCbiome_vOTU16764	-0.1206	0.1522	0.4282	0.7867	1034	269
Age	50-60	60-70	CRCbiome_vOTU17670	0.1238	0.1567	0.4295	0.7884	1034	231
Age	50-60	70-80	CRCbiome_vOTU08314	-0.125	0.1593	0.4327	0.7887	1034	300
Age	50-60	60-70	CRCbiome_vOTU16284	-0.08171	0.1041	0.4329	0.7887	1034	179
Age	50-60	60-70	CRCbiome_vOTU16396	0.08087	0.103	0.4323	0.7887	1034	124
Age	50-60	60-70	CRCbiome_vOTU18047	-0.06502	0.0845	0.4418	0.7952	1034	108
Age	50-60	70-80	CRCbiome_vOTU09914	0.1549	0.2024	0.4441	0.7969	1034	515
Age	50-60	70-80	CRCbiome_vOTU00680	0.08329	0.1135	0.4633	0.8032	1034	148
Age	50-60	70-80	CRCbiome_vOTU03890	-0.06234	0.0876	0.4769	0.8032	1034	106
Age	50-60	70-80	CRCbiome_vOTU04326	-0.09938	0.1396	0.4767	0.8032	1034	149
Age	50-60	60-70	CRCbiome_vOTU06524	0.09496	0.1317	0.4712	0.8032	1034	206
Age	50-60	70-80	CRCbiome_vOTU06779	0.1355	0.1837	0.461	0.8032	1034	252
Age	50-60	70-80	CRCbiome_vOTU06796	0.07733	0.1029	0.4524	0.8032	1034	135
Age	50-60	60-70	CRCbiome_vOTU07538	-0.1017	0.1409	0.4707	0.8032	1034	158
Age	50-60	70-80	CRCbiome_vOTU07547	-0.1386	0.198	0.484	0.8032	1034	275
Age	50-60	60-70	CRCbiome_vOTU08771	-0.09218	0.1227	0.4526	0.8032	1034	157
Age	50-60	70-80	CRCbiome_vOTU13168	-0.09641	0.1371	0.4821	0.8032	1034	195
Age	50-60	70-80	CRCbiome_vOTU14796	0.1343	0.1804	0.4566	0.8032	1034	783
Age	50-60	60-70	CRCbiome_vOTU15035	-0.1098	0.1475	0.4566	0.8032	1034	563
Age	50-60	60-70	CRCbiome_vOTU17028	-0.1233	0.1668	0.4599	0.8032	1034	291
Age	50-60	70-80	CRCbiome_vOTU17028	-0.1269	0.1731	0.4637	0.8032	1034	291
Age	50-60	60-70	CRCbiome_vOTU17956	-0.07602	0.1043	0.4662	0.8032	1034	138
Age	50-60	70-80	CRCbiome_vOTU18297	-0.08214	0.1144	0.4729	0.8032	1034	161
Age	50-60	60-70	CRCbiome_vOTU00300	-0.09678	0.1387	0.4854	0.8042	1034	131
Age	50-60	70-80	CRCbiome_vOTU00307	0.08412	0.1207	0.4861	0.8042	1034	213
Age	50-60	60-70	CRCbiome_vOTU14796	0.1183	0.1738	0.4963	0.8106	1034	783
Age	50-60	70-80	CRCbiome_vOTU06949	-0.1026	0.1569	0.5135	0.8277	1034	446
Age	50-60	70-80	CRCbiome_vOTU07538	-0.09393	0.1462	0.5208	0.8335	1034	158
Age	50-60	70-80	CRCbiome_vOTU09503	-0.1043	0.1626	0.5212	0.8335	1034	551
Age	50-60	60-70	CRCbiome_vOTU05728	-0.06045	0.09506	0.525	0.8338	1034	118
Age	50-60	70-80	CRCbiome_vOTU17956	0.06883	0.1082	0.5249	0.8338	1034	138
Age	50-60	60-70	CRCbiome_vOTU00063	-0.08023	0.1264	0.5257	0.8339	1034	197
Age	50-60	60-70	CRCbiome_vOTU08908	0.05982	0.09558	0.5316	0.8386	1034	117
Age	50-60	70-80	CRCbiome_vOTU07146	0.05901	0.09476	0.5336	0.841	1034	109
Age	50-60	60-70	CRCbiome_vOTU18056	0.07698	0.1243	0.5359	0.8418	1034	122
Age	50-60	70-80	CRCbiome_vOTU04186	-0.06237	0.1017	0.5398	0.8423	1034	126
Age	50-60	70-80	CRCbiome_vOTU05051	0.06906	0.112	0.5376	0.8423	1034	158
Age	50-60	70-80	CRCbiome_vOTU07437	0.07085	0.1158	0.5408	0.8423	1034	171
Age	50-60	60-70	CRCbiome_vOTU08262	-0.05911	0.09832	0.5478	0.8423	1034	131
Age	50-60	60-70	CRCbiome_vOTU10713	-0.06627	0.1081	0.5399	0.8423	1034	202
Age	50-60	70-80	CRCbiome_vOTU17423	0.07201	0.1194	0.5467	0.8423	1034	180
Age	50-60	70-80	CRCbiome_vOTU00071	0.07622	0.1275	0.5501	0.8434	1034	132
Age	50-60	70-80	CRCbiome_vOTU06147	0.05689	0.09597	0.5535	0.8442	1034	121
Age	50-60	60-70	CRCbiome_vOTU01802	0.05935	0.1011	0.5572	0.846	1034	149
Age	50-60	60-70	CRCbiome_vOTU18045	-0.09024	0.1546	0.5595	0.846	1034	261
Age	50-60	60-70	CRCbiome_vOTU06243	0.07099	0.1236	0.5659	0.8487	1034	127
Age	50-60	70-80	CRCbiome_vOTU00156	-0.06923	0.121	0.5674	0.8495	1034	107
Age	50-60	60-70	CRCbiome_vOTU00012	-0.07531	0.1402	0.5913	0.8623	1034	366
Age	50-60	70-80	CRCbiome_vOTU00063	-0.0717	0.1312	0.5848	0.8623	1034	197
Age	50-60	60-70	CRCbiome_vOTU09914	-0.1049	0.195	0.5907	0.8623	1034	515
Age	50-60	60-70	CRCbiome_vOTU18200	0.04663	0.08976	0.6035	0.8705	1034	109
Age	50-60	70-80	CRCbiome_vOTU00018	-0.1045	0.2103	0.6194	0.8784	1034	316
Age	50-60	60-70	CRCbiome_vOTU00307	-0.05823	0.1163	0.6168	0.8784	1034	213
Age	50-60	70-80	CRCbiome_vOTU18056	0.06414	0.129	0.6192	0.8784	1034	122
Age	50-60	60-70	CRCbiome_vOTU00160	0.03721	0.07595	0.6243	0.8787	1034	106
Age	50-60	70-80	CRCbiome_vOTU00300	-0.06967	0.1439	0.6284	0.8787	1034	131
Age	50-60	70-80	CRCbiome_vOTU00386	0.0604	0.125	0.6291	0.8787	1034	130
Age	50-60	70-80	CRCbiome_vOTU00738	-0.06652	0.1373	0.6281	0.8787	1034	140
Age	50-60	60-70	CRCbiome_vOTU14650	0.1084	0.2219	0.6252	0.8787	1034	463
Age	50-60	70-80	CRCbiome_vOTU18200	0.04546	0.09316	0.6257	0.8787	1034	109
Age	50-60	60-70	CRCbiome_vOTU06193	0.1064	0.2213	0.6308	0.8794	1034	571
Age	50-60	70-80	CRCbiome_vOTU02518	0.08421	0.1765	0.6335	0.8821	1034	529
Age	50-60	60-70	CRCbiome_vOTU16433	0.03833	0.081	0.6361	0.8832	1034	115
Age	50-60	60-70	CRCbiome_vOTU01238	-0.04922	0.1072	0.6463	0.8861	1034	158
Age	50-60	60-70	CRCbiome_vOTU08314	0.07025	0.1535	0.6473	0.8861	1034	300
Age	50-60	70-80	CRCbiome_vOTU00014	-0.07193	0.1575	0.6479	0.8863	1034	760
Age	50-60	70-80	CRCbiome_vOTU01238	-0.04996	0.1113	0.6535	0.8881	1034	158
Age	50-60	60-70	CRCbiome_vOTU17283	0.0451	0.1008	0.6546	0.8882	1034	183
Age	50-60	60-70	CRCbiome_vOTU00071	0.05254	0.1229	0.669	0.8952	1034	132
Age	50-60	70-80	CRCbiome_vOTU01802	0.04488	0.1049	0.6688	0.8952	1034	149
Age	50-60	70-80	CRCbiome_vOTU10262	-0.0752	0.1738	0.6654	0.8952	1034	419
Age	50-60	70-80	CRCbiome_vOTU14720	0.06112	0.1425	0.668	0.8952	1034	372
Age	50-60	60-70	CRCbiome_vOTU06136	-0.039	0.09312	0.6754	0.8971	1034	104
Age	50-60	60-70	CRCbiome_vOTU03890	0.03447	0.08441	0.6831	0.9012	1034	106
Age	50-60	70-80	CRCbiome_vOTU06837	-0.0397	0.09972	0.6906	0.9044	1034	110
Age	50-60	60-70	CRCbiome_vOTU06147	-0.03625	0.09247	0.6951	0.9051	1034	121
Age	50-60	60-70	CRCbiome_vOTU06510	0.03178	0.08196	0.6983	0.9063	1034	118
Age	50-60	70-80	CRCbiome_vOTU16764	0.06054	0.158	0.7016	0.907	1034	269
Age	50-60	70-80	CRCbiome_vOTU06277	0.07115	0.1879	0.7051	0.9072	1034	410
Age	50-60	60-70	CRCbiome_vOTU00102	0.05275	0.1432	0.7127	0.9106	1034	216
Age	50-60	70-80	CRCbiome_vOTU05728	0.03651	0.09866	0.7114	0.9106	1034	118
Age	50-60	60-70	CRCbiome_vOTU04326	0.0493	0.1345	0.7141	0.9108	1034	149
Age	50-60	60-70	CRCbiome_vOTU10907	-0.05959	0.1636	0.7157	0.9111	1034	337
Age	50-60	60-70	CRCbiome_vOTU00335	0.06153	0.1775	0.7289	0.9119	1034	412
Age	50-60	60-70	CRCbiome_vOTU08025	0.04117	0.1178	0.7269	0.9119	1034	104
Age	50-60	60-70	CRCbiome_vOTU16923	0.0424	0.1196	0.723	0.9119	1034	179
Age	50-60	60-70	CRCbiome_vOTU03303	-0.03729	0.1096	0.7338	0.9139	1034	126
Age	50-60	60-70	CRCbiome_vOTU07352	-0.05457	0.1623	0.7368	0.9152	1034	387
Age	50-60	70-80	CRCbiome_vOTU03303	-0.03736	0.1137	0.7426	0.918	1034	126
Age	50-60	70-80	CRCbiome_vOTU04155	0.0385	0.1188	0.746	0.918	1034	154
Age	50-60	60-70	CRCbiome_vOTU06837	-0.0308	0.09608	0.7486	0.9195	1034	110
Age	50-60	60-70	CRCbiome_vOTU07624	0.05274	0.1678	0.7534	0.9214	1034	576
Age	50-60	70-80	CRCbiome_vOTU18008	-0.03669	0.1193	0.7585	0.9235	1034	125
Age	50-60	60-70	CRCbiome_vOTU06365	0.04674	0.1642	0.776	0.9292	1034	870
Age	50-60	60-70	CRCbiome_vOTU14017	0.03455	0.1208	0.7749	0.9292	1034	181
Age	50-60	70-80	CRCbiome_vOTU17445	0.04508	0.1539	0.7697	0.9292	1034	482
Age	50-60	60-70	CRCbiome_vOTU18008	0.03348	0.1149	0.7708	0.9292	1034	125
Age	50-60	70-80	CRCbiome_vOTU18047	0.0253	0.0877	0.773	0.9292	1034	108
Age	50-60	70-80	CRCbiome_vOTU18092	0.03412	0.1256	0.7859	0.9348	1034	124
Age	50-60	60-70	CRCbiome_vOTU07549	0.02291	0.08646	0.791	0.9365	1034	124
Age	50-60	60-70	CRCbiome_vOTU00409	0.02597	0.1005	0.7961	0.9386	1034	154
Age	50-60	60-70	CRCbiome_vOTU11186	0.02583	0.09922	0.7946	0.9386	1034	112
Age	50-60	70-80	CRCbiome_vOTU18341	-0.02216	0.0854	0.7953	0.9386	1034	122
Age	50-60	60-70	CRCbiome_vOTU09195	-0.02085	0.08167	0.7986	0.9394	1034	104
Age	50-60	60-70	CRCbiome_vOTU11258	-0.03393	0.1398	0.8083	0.9444	1034	221
Age	50-60	70-80	CRCbiome_vOTU07624	-0.04145	0.1742	0.8119	0.9445	1034	576
Age	50-60	60-70	CRCbiome_vOTU06407	-0.04236	0.1848	0.8188	0.9471	1034	306
Age	50-60	60-70	CRCbiome_vOTU13168	-0.03031	0.1321	0.8186	0.9471	1034	195
Age	50-60	70-80	CRCbiome_vOTU00012	-0.03269	0.1455	0.8223	0.9494	1034	366
Age	50-60	70-80	CRCbiome_vOTU00335	0.04032	0.1842	0.8268	0.9505	1034	412
Age	50-60	60-70	CRCbiome_vOTU04840	-0.01848	0.08444	0.8268	0.9505	1034	175
Age	50-60	70-80	CRCbiome_vOTU14650	-0.05008	0.2303	0.8279	0.9505	1034	463
Age	50-60	70-80	CRCbiome_vOTU00912	-0.03668	0.1721	0.8313	0.9515	1034	383
Age	50-60	70-80	CRCbiome_vOTU11258	-0.03109	0.1451	0.8304	0.9515	1034	221
Age	50-60	70-80	CRCbiome_vOTU16515	-0.02255	0.11	0.8376	0.9552	1034	148
Age	50-60	60-70	CRCbiome_vOTU06344	0.02391	0.1238	0.8469	0.9583	1034	281
Age	50-60	70-80	CRCbiome_vOTU09838	0.03248	0.1675	0.8462	0.9583	1034	731
Age	50-60	70-80	CRCbiome_vOTU18045	0.03096	0.1604	0.847	0.9583	1034	261
Age	50-60	60-70	CRCbiome_vOTU06890	0.02821	0.1485	0.8494	0.9598	1034	238
Age	50-60	60-70	CRCbiome_vOTU07146	0.01692	0.0913	0.853	0.9627	1034	109
Age	50-60	60-70	CRCbiome_vOTU00113	-0.02636	0.1453	0.8561	0.9652	1034	363
Age	50-60	70-80	CRCbiome_vOTU07583	0.03083	0.1738	0.8592	0.9657	1034	686
Age	50-60	60-70	CRCbiome_vOTU07547	0.03192	0.1908	0.8672	0.9674	1034	275
Age	50-60	70-80	CRCbiome_vOTU08908	-0.01594	0.0992	0.8724	0.9674	1034	117
Age	50-60	70-80	CRCbiome_vOTU13666	0.02288	0.1434	0.8733	0.9674	1034	390
Age	50-60	70-80	CRCbiome_vOTU17901	0.01856	0.116	0.8729	0.9674	1034	163
Age	50-60	60-70	CRCbiome_vOTU16948	-0.02389	0.153	0.876	0.9686	1034	866
Age	50-60	70-80	CRCbiome_vOTU02333	-0.02615	0.1685	0.8767	0.9688	1034	250
Age	50-60	60-70	CRCbiome_vOTU06250	0.01871	0.1305	0.886	0.9698	1034	263
Age	50-60	70-80	CRCbiome_vOTU08262	-0.0149	0.102	0.8839	0.9698	1034	131
Age	50-60	70-80	CRCbiome_vOTU09195	0.01276	0.08477	0.8804	0.9698	1034	104
Age	50-60	60-70	CRCbiome_vOTU18341	0.012070000000000001	0.08229	0.8835	0.9698	1034	122
Age	50-60	70-80	CRCbiome_vOTU00279	0.01336	0.0993	0.893	0.9715	1034	142
Age	50-60	60-70	CRCbiome_vOTU05224	0.01244	0.08925	0.8892	0.9715	1034	108
Age	50-60	70-80	CRCbiome_vOTU17283	-0.01351	0.1046	0.8972	0.9729	1034	183
Age	50-60	60-70	CRCbiome_vOTU16360	-0.01925	0.1528	0.8998	0.9751	1034	419
Age	50-60	60-70	CRCbiome_vOTU00279	-0.01146	0.09567	0.9046	0.9754	1034	142
Age	50-60	70-80	CRCbiome_vOTU14013	-0.01261	0.1131	0.9113	0.9761	1034	234
Age	50-60	70-80	CRCbiome_vOTU05990	-0.01431	0.1308	0.9129	0.9767	1034	166
Age	50-60	70-80	CRCbiome_vOTU08025	-0.01289	0.1223	0.9161	0.9767	1034	104
Age	50-60	70-80	CRCbiome_vOTU18494	-0.01422	0.1366	0.9171	0.9772	1034	210
Age	50-60	70-80	CRCbiome_vOTU00113	-0.01412	0.1508	0.9254	0.9777	1034	363
Age	50-60	70-80	CRCbiome_vOTU05224	-0.008857	0.09263	0.9238	0.9777	1034	108
Age	50-60	70-80	CRCbiome_vOTU05459	-0.01021	0.1141	0.9288	0.9777	1034	106
Age	50-60	70-80	CRCbiome_vOTU06250	0.01294	0.1354	0.9239	0.9777	1034	263
Age	50-60	60-70	CRCbiome_vOTU09503	-0.01461	0.1566	0.9257	0.9777	1034	551
Age	50-60	60-70	CRCbiome_vOTU11521	0.008555	0.08891	0.9234	0.9777	1034	119
Age	50-60	60-70	CRCbiome_vOTU00156	0.008804	0.1166	0.9398	0.9798	1034	107
Age	50-60	60-70	CRCbiome_vOTU05459	0.008346	0.11	0.9395	0.9798	1034	106
Age	50-60	70-80	CRCbiome_vOTU16284	0.008736	0.1081	0.9356	0.9798	1034	179
Age	50-60	70-80	CRCbiome_vOTU16292	0.01177	0.1654	0.9433	0.9813	1034	615
Age	50-60	60-70	CRCbiome_vOTU06277	-0.009757	0.1811	0.957	0.9863	1034	410
Age	50-60	70-80	CRCbiome_vOTU16360	-0.008598	0.1586	0.9568	0.9863	1034	419
Age	50-60	70-80	CRCbiome_vOTU05899	-0.006716	0.1433	0.9626	0.9893	1034	158
Age	50-60	70-80	CRCbiome_vOTU02986	0.003589	0.08127	0.9648	0.9909	1034	117
Age	50-60	60-70	CRCbiome_vOTU14013	0.004752	0.109	0.9652	0.9909	1034	234
Age	50-60	60-70	CRCbiome_vOTU16515	-0.003856	0.106	0.971	0.9915	1034	148
Age	50-60	60-70	CRCbiome_vOTU06961	-0.005206	0.1653	0.9749	0.9918	1034	256
Age	50-60	70-80	CRCbiome_vOTU18353	-0.006553	0.2134	0.9755	0.9918	1034	715
Age	50-60	60-70	CRCbiome_vOTU06625	-0.003755	0.1768	0.9831	0.9954	1034	318
Age	50-60	60-70	CRCbiome_vOTU01854	0.002721	0.1553	0.986	0.9965	1034	608
Age	50-60	70-80	CRCbiome_vOTU06136	-0.001397	0.09664	0.9885	0.9965	1034	104
Age	50-60	70-80	CRCbiome_vOTU07045	-0.001526	0.1012	0.988	0.9965	1034	149
Age	50-60	60-70	CRCbiome_vOTU17901	-0.001012	0.1118	0.9928	0.9981	1034	163
Age	50-60	60-70	CRCbiome_vOTU18478	-5.016e-4	0.1417	0.9972	0.9983	1034	526
Alcohol (g/day)	low	b_high	CRCbiome_vOTU00012	0.4964	0.1411	4.671e-4	0.1822	634	242
Alcohol (g/day)	low	b_high	CRCbiome_vOTU01696	-0.3033	0.09288	0.001154	0.3033	634	65
Alcohol (g/day)	low	b_high	CRCbiome_vOTU07583	0.4723	0.1649	0.004326	0.3635	634	426
Alcohol (g/day)	low	b_high	CRCbiome_vOTU01238	0.2739	0.09856	0.005611	0.3652	634	101
Alcohol (g/day)	low	b_high	CRCbiome_vOTU07352	0.4204	0.1524	0.005981	0.3683	634	225
Alcohol (g/day)	low	b_high	CRCbiome_vOTU00156	-0.2937	0.1167	0.01208	0.4245	634	65
Alcohol (g/day)	low	b_high	CRCbiome_vOTU09503	0.3902	0.1546	0.01183	0.4245	634	345
Alcohol (g/day)	low	b_high	CRCbiome_vOTU15035	0.3164	0.1277	0.0135	0.4301	634	338
Alcohol (g/day)	low	b_high	CRCbiome_vOTU00014	0.3419	0.1468	0.02018	0.4606	634	481
Alcohol (g/day)	low	b_high	CRCbiome_vOTU06949	0.3547	0.1497	0.01812	0.4606	634	290
Alcohol (g/day)	low	b_high	CRCbiome_vOTU11327	0.327	0.1406	0.02034	0.4606	634	327
Alcohol (g/day)	low	b_high	CRCbiome_vOTU16923	0.2575	0.1112	0.02087	0.4606	634	106
Alcohol (g/day)	low	b_high	CRCbiome_vOTU14013	0.2315	0.1029	0.02475	0.4799	634	133
Alcohol (g/day)	low	b_high	CRCbiome_vOTU06766	0.2844	0.1316	0.03111	0.4958	634	308
Alcohol (g/day)	low	b_high	CRCbiome_vOTU00675	-0.1886	0.08816	0.03281	0.4969	634	66
Alcohol (g/day)	low	b_high	CRCbiome_vOTU06524	0.2763	0.1297	0.03353	0.4969	634	124
Alcohol (g/day)	low	b_high	CRCbiome_vOTU11017	0.2723	0.1269	0.0323	0.4969	634	183
Alcohol (g/day)	low	b_high	CRCbiome_vOTU17423	0.2421	0.1134	0.03319	0.4969	634	108
Alcohol (g/day)	low	b_high	CRCbiome_vOTU00102	0.262	0.124	0.03505	0.504	634	128
Alcohol (g/day)	low	b_high	CRCbiome_vOTU06847	0.2816	0.1396	0.04415	0.5207	634	344
Alcohol (g/day)	low	b_high	CRCbiome_vOTU07544	0.1806	0.09264	0.05165	0.5493	634	67
Alcohol (g/day)	low	b_high	CRCbiome_vOTU00108	0.3684	0.1901	0.05305	0.5567	634	445
Alcohol (g/day)	low	b_high	CRCbiome_vOTU13666	-0.2582	0.1342	0.05475	0.5593	634	234
Alcohol (g/day)	low	b_high	CRCbiome_vOTU14720	-0.2353	0.1222	0.05473	0.5593	634	222
Alcohol (g/day)	low	b_high	CRCbiome_vOTU14802	0.188	0.09837	0.05641	0.5594	634	100
Alcohol (g/day)	low	b_high	CRCbiome_vOTU07045	0.1783	0.09501	0.06108	0.5627	634	88
Alcohol (g/day)	low	b_high	CRCbiome_vOTU01802	0.1864	0.1025	0.06958	0.5693	634	95
Alcohol (g/day)	low	b_high	CRCbiome_vOTU14990	0.2105	0.1157	0.06923	0.5693	634	126
Alcohol (g/day)	low	b_high	CRCbiome_vOTU09801	-0.1343	0.07419	0.07067	0.5722	634	64
Alcohol (g/day)	low	b_high	CRCbiome_vOTU00185	0.1695	0.0956	0.07674	0.5841	634	74
Alcohol (g/day)	low	b_high	CRCbiome_vOTU04840	0.1401	0.08006	0.08051	0.5841	634	103
Alcohol (g/day)	low	b_high	CRCbiome_vOTU08314	0.2564	0.1433	0.07406	0.5841	634	166
Alcohol (g/day)	low	b_high	CRCbiome_vOTU08908	-0.1573	0.08905	0.07778	0.5841	634	75
Alcohol (g/day)	low	b_high	CRCbiome_vOTU14617	0.2025	0.1143	0.07699	0.5841	634	143
Alcohol (g/day)	low	b_high	CRCbiome_vOTU10262	0.2811	0.1633	0.08575	0.5865	634	249
Alcohol (g/day)	low	b_high	CRCbiome_vOTU14796	0.2539	0.1472	0.08517	0.5865	634	467
Alcohol (g/day)	low	b_high	CRCbiome_vOTU05224	0.1343	0.08205	0.1023	0.6064	634	67
Alcohol (g/day)	low	b_high	CRCbiome_vOTU00236	0.1532	0.09502	0.1074	0.6151	634	80
Alcohol (g/day)	low	b_high	CRCbiome_vOTU01854	0.2184	0.1396	0.1181	0.6256	634	369
Alcohol (g/day)	low	b_high	CRCbiome_vOTU05051	-0.1625	0.107	0.1292	0.6459	634	102
Alcohol (g/day)	low	b_high	CRCbiome_vOTU16360	0.2246	0.1509	0.1373	0.6485	634	249
Alcohol (g/day)	low	b_high	CRCbiome_vOTU16623	0.1252	0.08364	0.1348	0.6485	634	90
Alcohol (g/day)	low	b_high	CRCbiome_vOTU04186	0.1445	0.101	0.153	0.6565	634	86
Alcohol (g/day)	low	b_high	CRCbiome_vOTU06796	0.1278	0.0888	0.1506	0.6565	634	75
Alcohol (g/day)	low	b_high	CRCbiome_vOTU08262	0.1393	0.09675	0.1505	0.6565	634	86
Alcohol (g/day)	low	b_high	CRCbiome_vOTU14650	0.254	0.1796	0.1579	0.6565	634	282
Alcohol (g/day)	low	b_high	CRCbiome_vOTU18008	0.1496	0.1056	0.1572	0.6565	634	70
Alcohol (g/day)	low	b_high	CRCbiome_vOTU18455	-0.1614	0.1152	0.1617	0.6565	634	71
Alcohol (g/day)	low	b_high	CRCbiome_vOTU06383	0.1442	0.1097	0.1893	0.672	634	110
Alcohol (g/day)	low	b_high	CRCbiome_vOTU06243	0.1591	0.1228	0.1957	0.6752	634	78
Alcohol (g/day)	low	b_high	CRCbiome_vOTU16292	0.1895	0.1465	0.1965	0.6752	634	365
Alcohol (g/day)	low	b_high	CRCbiome_vOTU08771	-0.1518	0.1182	0.1994	0.6801	634	94
Alcohol (g/day)	low	b_high	CRCbiome_vOTU16764	0.159	0.1245	0.2021	0.6824	634	173
Alcohol (g/day)	low	b_high	CRCbiome_vOTU03303	-0.1136	0.0933	0.2238	0.6843	634	74
Alcohol (g/day)	low	b_high	CRCbiome_vOTU04326	0.1476	0.1194	0.2169	0.6843	634	85
Alcohol (g/day)	low	b_high	CRCbiome_vOTU06201	-0.1011	0.0818	0.2168	0.6843	634	65
Alcohol (g/day)	low	b_high	CRCbiome_vOTU16948	0.183	0.1478	0.216	0.6843	634	523
Alcohol (g/day)	low	b_high	CRCbiome_vOTU06890	0.1608	0.1339	0.2303	0.6852	634	134
Alcohol (g/day)	low	b_high	CRCbiome_vOTU16433	0.093410000000000007	0.0778	0.2303	0.6852	634	69
Alcohol (g/day)	low	b_high	CRCbiome_vOTU02333	-0.1806	0.1536	0.2401	0.6899	634	152
Alcohol (g/day)	low	b_high	CRCbiome_vOTU06147	0.1072	0.09167	0.2429	0.6923	634	80
Alcohol (g/day)	low	b_high	CRCbiome_vOTU00495	0.1083	0.09342	0.2468	0.6991	634	70
Alcohol (g/day)	low	b_high	CRCbiome_vOTU00579	0.1417	0.1261	0.2615	0.7176	634	142
Alcohol (g/day)	low	b_high	CRCbiome_vOTU09493	0.1293	0.1176	0.2717	0.7236	634	113
Alcohol (g/day)	low	b_high	CRCbiome_vOTU00386	0.1203	0.1131	0.2881	0.7303	634	72
Alcohol (g/day)	low	b_high	CRCbiome_vOTU05594	0.1065	0.1012	0.2928	0.7344	634	88
Alcohol (g/day)	low	b_high	CRCbiome_vOTU11362	0.08447	0.08153	0.3006	0.7414	634	65
Alcohol (g/day)	low	b_high	CRCbiome_vOTU07437	-0.1084	0.1086	0.3183	0.7525	634	110
Alcohol (g/day)	low	b_high	CRCbiome_vOTU04155	0.1047	0.1059	0.3232	0.7551	634	83
Alcohol (g/day)	low	b_high	CRCbiome_vOTU17956	0.0991	0.1007	0.3256	0.7573	634	88
Alcohol (g/day)	low	b_high	CRCbiome_vOTU12609	0.1891	0.1927	0.3269	0.7589	634	411
Alcohol (g/day)	low	b_high	CRCbiome_vOTU18294	-0.1467	0.1518	0.3343	0.7669	634	143
Alcohol (g/day)	low	b_high	CRCbiome_vOTU10713	0.1016	0.1061	0.3385	0.7703	634	122
Alcohol (g/day)	low	b_high	CRCbiome_vOTU08913	0.0823	0.08629	0.3406	0.7722	634	94
Alcohol (g/day)	low	b_high	CRCbiome_vOTU13168	-0.116	0.1239	0.3492	0.7752	634	135
Alcohol (g/day)	low	b_high	CRCbiome_vOTU10907	0.1392	0.1502	0.3543	0.776	634	197
Alcohol (g/day)	low	b_high	CRCbiome_vOTU07549	0.07764	0.08529	0.363	0.7818	634	79
Alcohol (g/day)	low	b_high	CRCbiome_vOTU16067	0.06533	0.07289	0.3705	0.7893	634	71
Alcohol (g/day)	low	b_high	CRCbiome_vOTU12410	-0.08015	0.09523	0.4003	0.8041	634	64
Alcohol (g/day)	low	b_high	CRCbiome_vOTU09914	0.1608	0.1924	0.4036	0.8067	634	314
Alcohol (g/day)	low	b_high	CRCbiome_vOTU18047	-0.07139	0.08649	0.4094	0.8107	634	71
Alcohol (g/day)	low	b_high	CRCbiome_vOTU00063	-0.0977	0.1207	0.4187	0.814	634	119
Alcohol (g/day)	low	b_high	CRCbiome_vOTU07538	0.1009	0.1244	0.4177	0.814	634	105
Alcohol (g/day)	low	b_high	CRCbiome_vOTU16396	0.08107	0.1008	0.4215	0.814	634	79
Alcohol (g/day)	low	b_high	CRCbiome_vOTU06510	0.06602	0.08257	0.4243	0.8171	634	67
Alcohol (g/day)	low	b_high	CRCbiome_vOTU17028	-0.1303	0.1632	0.4251	0.818	634	177
Alcohol (g/day)	low	b_high	CRCbiome_vOTU11258	0.1089	0.139	0.4338	0.8253	634	141
Alcohol (g/day)	low	b_high	CRCbiome_vOTU17283	0.07285	0.09791	0.4571	0.8442	634	115
Alcohol (g/day)	low	b_high	CRCbiome_vOTU15587	-0.1178	0.1624	0.4687	0.8521	634	183
Alcohol (g/day)	low	b_high	CRCbiome_vOTU18353	-0.1453	0.2003	0.4685	0.8521	634	442
Alcohol (g/day)	low	b_high	CRCbiome_vOTU06365	0.1023	0.1474	0.4879	0.8597	634	527
Alcohol (g/day)	low	b_high	CRCbiome_vOTU00307	0.07745	0.1168	0.5076	0.865	634	137
Alcohol (g/day)	low	b_high	CRCbiome_vOTU06277	-0.1212	0.1824	0.5067	0.865	634	251
Alcohol (g/day)	low	b_high	CRCbiome_vOTU08410	-0.04594	0.07049	0.5148	0.865	634	65
Alcohol (g/day)	low	b_high	CRCbiome_vOTU18045	-0.1005	0.1537	0.5134	0.865	634	164
Alcohol (g/day)	low	b_high	CRCbiome_vOTU18092	-0.07514	0.1147	0.5126	0.865	634	80
Alcohol (g/day)	low	b_high	CRCbiome_vOTU15475	-0.0497	0.07801	0.5243	0.8669	634	71
Alcohol (g/day)	low	b_high	CRCbiome_vOTU12833	-0.1167	0.1852	0.5289	0.8684	634	339
Alcohol (g/day)	low	b_high	CRCbiome_vOTU07167	0.05317	0.08474	0.5306	0.8701	634	76
Alcohol (g/day)	low	b_high	CRCbiome_vOTU06460	0.05351	0.08666	0.5371	0.8727	634	93
Alcohol (g/day)	low	b_high	CRCbiome_vOTU06476	-0.08106	0.1315	0.5378	0.8727	634	109
Alcohol (g/day)	low	b_high	CRCbiome_vOTU06695	-0.06103	0.09853	0.5359	0.8727	634	84
Alcohol (g/day)	low	b_high	CRCbiome_vOTU02518	0.09491	0.1592	0.5512	0.8737	634	313
Alcohol (g/day)	low	b_high	CRCbiome_vOTU05899	0.0737	0.1229	0.5489	0.8737	634	102
Alcohol (g/day)	low	b_high	CRCbiome_vOTU05990	0.07645	0.1254	0.5422	0.8737	634	105
Alcohol (g/day)	low	b_high	CRCbiome_vOTU09838	0.08883	0.1491	0.5516	0.8737	634	448
Alcohol (g/day)	low	b_high	CRCbiome_vOTU18341	0.04761	0.07964	0.5502	0.8737	634	75
Alcohol (g/day)	low	b_high	CRCbiome_vOTU06344	0.06601	0.1124	0.5573	0.8746	634	185
Alcohol (g/day)	low	b_high	CRCbiome_vOTU18297	0.05798	0.09913	0.5588	0.8752	634	104
Alcohol (g/day)	low	b_high	CRCbiome_vOTU00071	-0.06615	0.1141	0.5624	0.8756	634	79
Alcohol (g/day)	low	b_high	CRCbiome_vOTU16515	0.05606	0.09729	0.5647	0.8756	634	95
Alcohol (g/day)	low	b_high	CRCbiome_vOTU06779	0.08537	0.1511	0.5724	0.8822	634	147
Alcohol (g/day)	low	b_high	CRCbiome_vOTU12720	-0.05475	0.09744	0.5744	0.8822	634	66
Alcohol (g/day)	low	b_high	CRCbiome_vOTU00076	0.09392	0.1732	0.5878	0.8864	634	265
Alcohol (g/day)	low	b_high	CRCbiome_vOTU14742	-0.08009	0.1462	0.5841	0.8864	634	194
Alcohol (g/day)	low	b_high	CRCbiome_vOTU06206	0.05803	0.1099	0.5977	0.8889	634	114
Alcohol (g/day)	low	b_high	CRCbiome_vOTU18056	0.05637	0.1159	0.627	0.9028	634	75
Alcohol (g/day)	low	b_high	CRCbiome_vOTU00335	-0.08384	0.1785	0.6387	0.9058	634	261
Alcohol (g/day)	low	b_high	CRCbiome_vOTU06961	-0.07382	0.1575	0.6395	0.906	634	147
Alcohol (g/day)	low	b_high	CRCbiome_vOTU06407	-0.08345	0.1821	0.647	0.9109	634	190
Alcohol (g/day)	low	b_high	CRCbiome_vOTU06250	-0.05758	0.127	0.6505	0.912	634	155
Alcohol (g/day)	low	b_high	CRCbiome_vOTU17495	-0.04897	0.1168	0.6751	0.9172	634	91
Alcohol (g/day)	low	b_high	CRCbiome_vOTU07624	0.05433	0.1365	0.6906	0.9275	634	343
Alcohol (g/day)	low	b_high	CRCbiome_vOTU06261	0.04353	0.1107	0.6942	0.9293	634	97
Alcohol (g/day)	low	b_high	CRCbiome_vOTU18478	-0.05345	0.1379	0.6983	0.9305	634	312
Alcohol (g/day)	low	b_high	CRCbiome_vOTU14044	-0.05626	0.1523	0.7119	0.9358	634	172
Alcohol (g/day)	low	b_high	CRCbiome_vOTU06193	-0.07388	0.2059	0.7199	0.9368	634	339
Alcohol (g/day)	low	b_high	CRCbiome_vOTU06837	-0.03324	0.0932	0.7215	0.9368	634	68
Alcohol (g/day)	low	b_high	CRCbiome_vOTU14017	-0.04344	0.1206	0.7189	0.9368	634	116
Alcohol (g/day)	low	b_high	CRCbiome_vOTU00680	0.03774	0.1071	0.7247	0.9372	634	91
Alcohol (g/day)	low	b_high	CRCbiome_vOTU15976	0.04014	0.1165	0.7305	0.9397	634	84
Alcohol (g/day)	low	b_high	CRCbiome_vOTU17670	-0.05376	0.1563	0.731	0.9397	634	144
Alcohol (g/day)	low	b_high	CRCbiome_vOTU18323	-0.04356	0.1328	0.7431	0.9414	634	96
Alcohol (g/day)	low	b_high	CRCbiome_vOTU13928	0.03793	0.1209	0.7538	0.944	634	184
Alcohol (g/day)	low	b_high	CRCbiome_vOTU00409	-0.03147	0.1033	0.7607	0.9469	634	97
Alcohol (g/day)	low	b_high	CRCbiome_vOTU14163	-0.04854	0.1615	0.7639	0.9493	634	250
Alcohol (g/day)	low	b_high	CRCbiome_vOTU00912	0.04657	0.1581	0.7684	0.9518	634	233
Alcohol (g/day)	low	b_high	CRCbiome_vOTU06625	-0.04612	0.1671	0.7827	0.9531	634	192
Alcohol (g/day)	low	b_high	CRCbiome_vOTU00018	0.05497	0.2039	0.7875	0.9546	634	200
Alcohol (g/day)	low	b_high	CRCbiome_vOTU00300	0.03548	0.1319	0.7881	0.9546	634	78
Alcohol (g/day)	low	b_high	CRCbiome_vOTU07547	-0.04449	0.17	0.7936	0.9546	634	166
Alcohol (g/day)	low	b_high	CRCbiome_vOTU11521	-0.02031	0.08372	0.8084	0.9568	634	76
Alcohol (g/day)	low	b_high	CRCbiome_vOTU16284	-0.02033	0.1046	0.846	0.9656	634	109
Alcohol (g/day)	low	b_high	CRCbiome_vOTU17445	0.02427	0.1267	0.8481	0.9656	634	288
Alcohol (g/day)	low	b_high	CRCbiome_vOTU18494	0.02744	0.1281	0.8305	0.9656	634	129
Alcohol (g/day)	low	b_high	CRCbiome_vOTU00279	0.01552	0.08909	0.8618	0.9663	634	73
Alcohol (g/day)	low	b_high	CRCbiome_vOTU02714	-0.01658	0.1329	0.9008	0.974	634	96
Alcohol (g/day)	low	b_high	CRCbiome_vOTU17901	-0.01264	0.1034	0.9028	0.9753	634	88
Alcohol (g/day)	low	b_high	CRCbiome_vOTU00160	-0.007343	0.06903	0.9153	0.9807	634	65
Alcohol (g/day)	low	b_high	CRCbiome_vOTU05728	0.00828	0.09549	0.9309	0.9875	634	76
Alcohol (g/day)	low	b_high	CRCbiome_vOTU05693	0.01309	0.2018	0.9483	0.9943	634	382
Alcohol (g/day)	low	b_high	CRCbiome_vOTU11150	-0.007357	0.1133	0.9483	0.9943	634	99
Alcohol (g/day)	low	b_high	CRCbiome_vOTU10475	0.005016	0.1058	0.9622	0.9951	634	113
Alcohol (g/day)	low	b_high	CRCbiome_vOTU00113	-0.005159	0.1367	0.9699	0.9958	634	226
Alcohol (g/day)	low	b_high	CRCbiome_vOTU00738	-0.002537	0.1247	0.9838	0.9963	634	77
Alcohol (g/day)	low	b_high	CRCbiome_vOTU09395	-0.00248	0.07892	0.9749	0.9963	634	69
Alcohol (g/day)	low	b_high	CRCbiome_vOTU04991	-0.001272	0.0921	0.989	0.9967	634	93
Alcohol (g/day)	low	b_high	CRCbiome_vOTU11186	-8.945e-4	0.09818	0.9927	0.9967	634	72
Antacid use	No	Yes	CRCbiome_vOTU18297	-0.2264	0.08939	0.01148	0.2949	989	149
Antacid use	No	Yes	CRCbiome_vOTU16292	-0.3113	0.1308	0.0175	0.3264	989	592
Antacid use	No	Yes	CRCbiome_vOTU07167	-0.1793	0.07876	0.02302	0.3536	989	119
Antacid use	No	Yes	CRCbiome_vOTU07352	-0.2985	0.1326	0.02456	0.3541	989	361
Antacid use	No	Yes	CRCbiome_vOTU05899	-0.2404	0.1128	0.0333	0.4292	989	150
Antacid use	No	Yes	CRCbiome_vOTU07538	-0.2436	0.1151	0.03449	0.4311	989	149
Antacid use	No	Yes	CRCbiome_vOTU14802	0.1908	0.09054	0.03539	0.4346	989	164
Antacid use	No	Yes	CRCbiome_vOTU06206	-0.2103	0.1008	0.03716	0.4368	989	186
Antacid use	No	Yes	CRCbiome_vOTU18045	0.2666	0.1281	0.03771	0.4368	989	252
Antacid use	No	Yes	CRCbiome_vOTU10475	-0.2353	0.1167	0.0441	0.4537	989	179
Antacid use	No	Yes	CRCbiome_vOTU18047	0.1407	0.07115	0.04827	0.4696	989	106
Antacid use	No	Yes	CRCbiome_vOTU06766	-0.2227	0.1128	0.04863	0.4703	989	471
Antacid use	No	Yes	CRCbiome_vOTU05990	-0.199	0.1028	0.05308	0.4705	989	157
Antacid use	No	Yes	CRCbiome_vOTU16284	-0.162	0.0851	0.05727	0.4789	989	169
Antacid use	No	Yes	CRCbiome_vOTU11258	-0.2134	0.1139	0.06138	0.4802	989	209
Antacid use	No	Yes	CRCbiome_vOTU04840	-0.1308	0.07026	0.06295	0.4834	989	168
Antacid use	No	Yes	CRCbiome_vOTU16360	-0.2271	0.1254	0.07049	0.503	989	397
Antacid use	No	Yes	CRCbiome_vOTU16923	-0.1616	0.08984	0.07246	0.503	989	166
Antacid use	No	Yes	CRCbiome_vOTU07045	0.1413	0.08001	0.07764	0.5154	989	139
Antacid use	No	Yes	CRCbiome_vOTU06147	-0.1362	0.07782	0.0805	0.5258	989	119
Antacid use	No	Yes	CRCbiome_vOTU06524	-0.1882	0.1082	0.08231	0.5314	989	196
Antacid use	No	Yes	CRCbiome_vOTU02518	-0.2393	0.1398	0.08726	0.5382	989	511
Antacid use	No	Yes	CRCbiome_vOTU06949	-0.2104	0.1243	0.09098	0.5382	989	425
Antacid use	No	Yes	CRCbiome_vOTU15976	-0.1641	0.09527	0.08524	0.5382	989	124
Antacid use	No	Yes	CRCbiome_vOTU06460	0.142	0.08455	0.09342	0.5421	989	150
Antacid use	No	Yes	CRCbiome_vOTU06407	0.2527	0.1526	0.0981	0.5464	989	294
Antacid use	No	Yes	CRCbiome_vOTU00102	-0.1724	0.1076	0.1093	0.5514	989	200
Antacid use	No	Yes	CRCbiome_vOTU18323	0.1717	0.1071	0.1092	0.5514	989	149
Antacid use	No	Yes	CRCbiome_vOTU04326	0.1724	0.1114	0.1222	0.5605	989	142
Antacid use	No	Yes	CRCbiome_vOTU06796	0.1231	0.08136	0.1308	0.5721	989	129
Antacid use	No	Yes	CRCbiome_vOTU09838	0.2002	0.133	0.1326	0.5737	989	699
Antacid use	No	Yes	CRCbiome_vOTU06261	-0.1327	0.08878	0.1352	0.5805	989	146
Antacid use	No	Yes	CRCbiome_vOTU13168	-0.158	0.1068	0.1393	0.5844	989	184
Antacid use	No	Yes	CRCbiome_vOTU01238	-0.1291	0.08826	0.1439	0.5921	989	152
Antacid use	No	Yes	CRCbiome_vOTU14990	0.1455	0.09979	0.1451	0.5951	989	203
Antacid use	No	Yes	CRCbiome_vOTU02714	0.1554	0.1082	0.1511	0.6009	989	156
Antacid use	No	Yes	CRCbiome_vOTU03303	0.1287	0.09049	0.1553	0.6027	989	121
Antacid use	No	Yes	CRCbiome_vOTU17901	-0.1291	0.09198	0.1608	0.6094	989	153
Antacid use	No	Yes	CRCbiome_vOTU08314	-0.1747	0.126	0.1658	0.6156	989	284
Antacid use	No	Yes	CRCbiome_vOTU00076	-0.2121	0.1541	0.169	0.6189	989	434
Antacid use	No	Yes	CRCbiome_vOTU00680	-0.1175	0.08686	0.1764	0.6239	989	138
Antacid use	No	Yes	CRCbiome_vOTU06344	-0.1356	0.1018	0.1832	0.6312	989	267
Antacid use	No	Yes	CRCbiome_vOTU00018	0.2206	0.1672	0.1873	0.6373	989	306
Antacid use	No	Yes	CRCbiome_vOTU16623	-0.09275	0.07027	0.1872	0.6373	989	144
Antacid use	No	Yes	CRCbiome_vOTU14617	-0.1413	0.1102	0.2003	0.6453	989	210
Antacid use	No	Yes	CRCbiome_vOTU16396	0.1096	0.08519	0.1984	0.6453	989	117
Antacid use	No	Yes	CRCbiome_vOTU18092	0.1246	0.09766	0.2022	0.6466	989	115
Antacid use	No	Yes	CRCbiome_vOTU18200	-0.09234	0.07299	0.2062	0.6538	989	106
Antacid use	No	Yes	CRCbiome_vOTU06847	-0.1527	0.1222	0.2118	0.6583	989	539
Antacid use	No	Yes	CRCbiome_vOTU17445	-0.1355	0.1081	0.2101	0.6583	989	464
Antacid use	No	Yes	CRCbiome_vOTU09914	0.1971	0.1605	0.2198	0.6665	989	495
Antacid use	No	Yes	CRCbiome_vOTU14044	0.1712	0.1402	0.2223	0.6671	989	265
Antacid use	No	Yes	CRCbiome_vOTU14163	-0.1615	0.1396	0.2477	0.6915	989	351
Antacid use	No	Yes	CRCbiome_vOTU15475	0.07766	0.06791	0.2531	0.6998	989	103
Antacid use	No	Yes	CRCbiome_vOTU04186	-0.08883	0.08076	0.2716	0.7153	989	118
Antacid use	No	Yes	CRCbiome_vOTU09503	-0.1417	0.1297	0.2748	0.7172	989	523
Antacid use	No	Yes	CRCbiome_vOTU16433	-0.07367	0.06741	0.2747	0.7172	989	110
Antacid use	No	Yes	CRCbiome_vOTU06193	0.1955	0.1827	0.2848	0.726	989	548
Antacid use	No	Yes	CRCbiome_vOTU08025	-0.1021	0.09684	0.2918	0.726	989	101
Antacid use	No	Yes	CRCbiome_vOTU12833	-0.1645	0.1564	0.2932	0.726	989	542
Antacid use	No	Yes	CRCbiome_vOTU17495	-0.1167	0.1096	0.2873	0.726	989	176
Antacid use	No	Yes	CRCbiome_vOTU18056	-0.1041	0.1014	0.3046	0.7305	989	118
Antacid use	No	Yes	CRCbiome_vOTU06201	0.071	0.07163	0.3219	0.7534	989	102
Antacid use	No	Yes	CRCbiome_vOTU04155	0.09285	0.09588	0.3331	0.7593	989	149
Antacid use	No	Yes	CRCbiome_vOTU06383	-0.07993	0.08477	0.346	0.7593	989	161
Antacid use	No	Yes	CRCbiome_vOTU06890	0.1209	0.1236	0.3284	0.7593	989	229
Antacid use	No	Yes	CRCbiome_vOTU08908	-0.07646	0.07882	0.3323	0.7593	989	112
Antacid use	No	Yes	CRCbiome_vOTU10262	-0.136	0.1398	0.3309	0.7593	989	400
Antacid use	No	Yes	CRCbiome_vOTU18008	0.09126	0.09541	0.3391	0.7593	989	122
Antacid use	No	Yes	CRCbiome_vOTU16515	0.07884	0.08699	0.365	0.7661	989	140
Antacid use	No	Yes	CRCbiome_vOTU08913	0.06722	0.07518	0.3715	0.7671	989	156
Antacid use	No	Yes	CRCbiome_vOTU00071	0.088	0.1029	0.3926	0.7842	989	130
Antacid use	No	Yes	CRCbiome_vOTU05459	0.07785	0.09039	0.3893	0.7842	989	106
Antacid use	No	Yes	CRCbiome_vOTU07437	-0.07708	0.09098	0.3971	0.7842	989	161
Antacid use	No	Yes	CRCbiome_vOTU18353	0.1449	0.1699	0.3938	0.7842	989	682
Antacid use	No	Yes	CRCbiome_vOTU00108	0.1385	0.1637	0.3976	0.7846	989	685
Antacid use	No	Yes	CRCbiome_vOTU16915	-0.08867	0.1064	0.4046	0.7925	989	99
Antacid use	No	Yes	CRCbiome_vOTU10907	-0.1107	0.1343	0.4099	0.7967	989	322
Antacid use	No	Yes	CRCbiome_vOTU11327	-0.1006	0.1238	0.4167	0.7985	989	517
Antacid use	No	Yes	CRCbiome_vOTU16948	-0.1036	0.1266	0.4133	0.7985	989	829
Antacid use	No	Yes	CRCbiome_vOTU05051	-0.07094	0.08863	0.4237	0.7997	989	150
Antacid use	No	Yes	CRCbiome_vOTU17956	-0.06803	0.08508	0.4242	0.7997	989	131
Antacid use	No	Yes	CRCbiome_vOTU11150	-0.08912	0.114	0.4347	0.8089	989	160
Antacid use	No	Yes	CRCbiome_vOTU14796	-0.1115	0.1445	0.4404	0.8123	989	744
Antacid use	No	Yes	CRCbiome_vOTU08262	0.06127	0.08061	0.4474	0.8183	989	126
Antacid use	No	Yes	CRCbiome_vOTU00236	-0.06192	0.08195	0.4501	0.82	989	121
Antacid use	No	Yes	CRCbiome_vOTU00386	-0.0741	0.09956	0.4569	0.8233	989	127
Antacid use	No	Yes	CRCbiome_vOTU06365	-0.101	0.1356	0.4566	0.8233	989	833
Antacid use	No	Yes	CRCbiome_vOTU06476	-0.1071	0.1452	0.461	0.8272	989	172
Antacid use	No	Yes	CRCbiome_vOTU05224	-0.05402	0.074	0.4656	0.8287	989	105
Antacid use	No	Yes	CRCbiome_vOTU07549	0.0515	0.07101	0.4685	0.8292	989	120
Antacid use	No	Yes	CRCbiome_vOTU00279	0.05771	0.08012	0.4716	0.8307	989	139
Antacid use	No	Yes	CRCbiome_vOTU16764	-0.08838	0.1261	0.4836	0.8343	989	254
Antacid use	No	Yes	CRCbiome_vOTU00579	-0.07203	0.104	0.4885	0.8355	989	215
Antacid use	No	Yes	CRCbiome_vOTU07146	-0.05134	0.07483	0.4929	0.8368	989	105
Antacid use	No	Yes	CRCbiome_vOTU07583	0.0883	0.1386	0.5242	0.8542	989	656
Antacid use	No	Yes	CRCbiome_vOTU11521	-0.04751	0.07341	0.5176	0.8542	989	114
Antacid use	No	Yes	CRCbiome_vOTU17423	-0.06003	0.09477	0.5266	0.8543	989	168
Antacid use	No	Yes	CRCbiome_vOTU09493	0.05978	0.09506	0.5296	0.8565	989	162
Antacid use	No	Yes	CRCbiome_vOTU00300	0.06038	0.09704	0.534	0.8575	989	125
Antacid use	No	Yes	CRCbiome_vOTU14650	0.1135	0.1825	0.5344	0.8575	989	441
Antacid use	No	Yes	CRCbiome_vOTU14017	-0.06147	0.09952	0.5369	0.8578	989	171
Antacid use	No	Yes	CRCbiome_vOTU06243	-0.06348	0.1037	0.5404	0.8593	989	125
Antacid use	No	Yes	CRCbiome_vOTU00156	-0.05902	0.0971	0.5434	0.8593	989	102
Antacid use	No	Yes	CRCbiome_vOTU11362	-0.04088	0.06757	0.5453	0.8593	989	100
Antacid use	No	Yes	CRCbiome_vOTU00495	-0.04732	0.08199	0.564	0.8639	989	119
Antacid use	No	Yes	CRCbiome_vOTU02119	-0.04075	0.06977	0.5593	0.8639	989	101
Antacid use	No	Yes	CRCbiome_vOTU18294	-0.06998	0.1244	0.5739	0.8684	989	226
Antacid use	No	Yes	CRCbiome_vOTU06277	-0.08213	0.1499	0.5839	0.8728	989	393
Antacid use	No	Yes	CRCbiome_vOTU00409	-0.04567	0.08383	0.5861	0.8731	989	147
Antacid use	No	Yes	CRCbiome_vOTU06779	0.07833	0.1451	0.5896	0.8737	989	237
Antacid use	No	Yes	CRCbiome_vOTU01854	-0.0645	0.13	0.6198	0.8855	989	580
Antacid use	No	Yes	CRCbiome_vOTU13928	-0.05476	0.1122	0.6255	0.8863	989	268
Antacid use	No	Yes	CRCbiome_vOTU00014	-0.06004	0.1253	0.6319	0.8897	989	727
Antacid use	No	Yes	CRCbiome_vOTU00012	-0.05418	0.1158	0.6399	0.8945	989	348
Antacid use	No	Yes	CRCbiome_vOTU02986	-0.02956	0.06363	0.6423	0.8964	989	113
Antacid use	No	Yes	CRCbiome_vOTU06250	-0.04956	0.1076	0.6451	0.897	989	250
Antacid use	No	Yes	CRCbiome_vOTU11186	0.03696	0.08132	0.6496	0.8976	989	107
Antacid use	No	Yes	CRCbiome_vOTU00912	-0.06059	0.137	0.6583	0.8983	989	366
Antacid use	No	Yes	CRCbiome_vOTU06695	-0.03587	0.08874	0.6862	0.9105	989	128
Antacid use	No	Yes	CRCbiome_vOTU12720	-0.03307	0.08304	0.6906	0.9107	989	110
Antacid use	No	Yes	CRCbiome_vOTU18455	-0.03941	0.0977	0.6868	0.9107	989	118
Antacid use	No	Yes	CRCbiome_vOTU08771	-0.03987	0.1009	0.6929	0.9107	989	149
Antacid use	No	Yes	CRCbiome_vOTU00113	0.04414	0.1193	0.7116	0.918	989	347
Antacid use	No	Yes	CRCbiome_vOTU06651	-0.0299	0.07839	0.703	0.918	989	99
Antacid use	No	Yes	CRCbiome_vOTU02333	-0.04609	0.1341	0.7311	0.9237	989	237
Antacid use	No	Yes	CRCbiome_vOTU05594	0.02932	0.08706	0.7363	0.9259	989	144
Antacid use	No	Yes	CRCbiome_vOTU17028	0.04614	0.1381	0.7383	0.9264	989	279
Antacid use	No	Yes	CRCbiome_vOTU00307	-0.02985	0.09521	0.754	0.9317	989	204
Antacid use	No	Yes	CRCbiome_vOTU06625	0.04616	0.1454	0.751	0.9317	989	304
Antacid use	No	Yes	CRCbiome_vOTU18478	-0.03639	0.1172	0.7563	0.9327	989	504
Antacid use	No	Yes	CRCbiome_vOTU15587	0.04165	0.1377	0.7623	0.9351	989	290
Antacid use	No	Yes	CRCbiome_vOTU00738	-0.03154	0.1083	0.7709	0.9359	989	135
Antacid use	No	Yes	CRCbiome_vOTU05693	-0.04657	0.1702	0.7844	0.9404	989	619
Antacid use	No	Yes	CRCbiome_vOTU00160	-0.01659	0.06223	0.7898	0.9427	989	100
Antacid use	No	Yes	CRCbiome_vOTU15035	-0.03055	0.1218	0.802	0.944	989	538
Antacid use	No	Yes	CRCbiome_vOTU00063	0.02563	0.1051	0.8074	0.9452	989	190
Antacid use	No	Yes	CRCbiome_vOTU06961	-0.03229	0.1368	0.8135	0.9469	989	243
Antacid use	No	Yes	CRCbiome_vOTU07547	0.03617	0.1569	0.8177	0.948	989	260
Antacid use	No	Yes	CRCbiome_vOTU17283	0.01907	0.08254	0.8173	0.948	989	176
Antacid use	No	Yes	CRCbiome_vOTU12609	-0.03134	0.1596	0.8444	0.9563	989	661
Antacid use	No	Yes	CRCbiome_vOTU05728	-0.01502	0.07806	0.8475	0.9574	989	113
Antacid use	No	Yes	CRCbiome_vOTU07624	-0.0244	0.1382	0.8599	0.9636	989	546
Antacid use	No	Yes	CRCbiome_vOTU10713	-0.01578	0.08981	0.8605	0.9639	989	192
Antacid use	No	Yes	CRCbiome_vOTU13666	-0.01885	0.1145	0.8693	0.9677	989	376
Antacid use	No	Yes	CRCbiome_vOTU08410	0.00881	0.05945	0.8822	0.9729	989	99
Antacid use	No	Yes	CRCbiome_vOTU17670	-0.01973	0.1297	0.8791	0.9729	989	221
Antacid use	No	Yes	CRCbiome_vOTU00185	-0.01081	0.08059	0.8933	0.9771	989	107
Antacid use	No	Yes	CRCbiome_vOTU18494	0.01455	0.1084	0.8933	0.9771	989	200
Antacid use	No	Yes	CRCbiome_vOTU01802	-0.00921	0.07843	0.9065	0.9804	989	142
Antacid use	No	Yes	CRCbiome_vOTU06136	0.007715	0.0773	0.9205	0.9844	989	99
Antacid use	No	Yes	CRCbiome_vOTU14720	-0.008945	0.1146	0.9378	0.9916	989	356
Antacid use	No	Yes	CRCbiome_vOTU14013	-0.005839	0.09014	0.9484	0.9923	989	224
Antacid use	No	Yes	CRCbiome_vOTU06837	0.004399	0.07986	0.9561	0.9924	989	105
Antacid use	No	Yes	CRCbiome_vOTU11017	-0.007462	0.1213	0.951	0.9924	989	301
Antacid use	No	Yes	CRCbiome_vOTU14742	-0.005129	0.1408	0.971	0.9971	989	315
Antacid use	No	Yes	CRCbiome_vOTU00335	0.002461	0.1471	0.9867	0.9977	989	394
Antacid use	No	Yes	CRCbiome_vOTU03890	4.042e-4	0.07001	0.9954	0.9977	989	101
Antacid use	No	Yes	CRCbiome_vOTU04991	-0.001262	0.08197	0.9877	0.9977	989	154
Antacid use	No	Yes	CRCbiome_vOTU06510	0.001623	0.06719	0.9807	0.9977	989	110
Antacid use	No	Yes	CRCbiome_vOTU09195	-0.001581	0.0683	0.9815	0.9977	989	103
Antacid use	No	Yes	CRCbiome_vOTU18341	0.001733	0.06682	0.9793	0.9977	989	115
Antibiotics use	No	Yes	CRCbiome_vOTU14796	-0.6115	0.1842	9.325e-4	0.08285	983	741
Antibiotics use	No	Yes	CRCbiome_vOTU07624	-0.5472	0.1771	0.002056	0.1261	983	545
Antibiotics use	No	Yes	CRCbiome_vOTU14163	-0.5259	0.1781	0.003224	0.1389	983	348
Antibiotics use	No	Yes	CRCbiome_vOTU08913	0.272	0.09637	0.004862	0.163	983	151
Antibiotics use	No	Yes	CRCbiome_vOTU05459	-0.261	0.1147	0.02312	0.3151	983	102
Antibiotics use	No	Yes	CRCbiome_vOTU01854	-0.3595	0.1641	0.02869	0.3373	983	578
Antibiotics use	No	Yes	CRCbiome_vOTU17423	-0.2603	0.1213	0.03206	0.3448	983	166
Antibiotics use	No	Yes	CRCbiome_vOTU15035	-0.3109	0.1564	0.04719	0.3865	983	536
Antibiotics use	No	Yes	CRCbiome_vOTU16360	-0.2989	0.1611	0.06376	0.4383	983	393
Antibiotics use	No	Yes	CRCbiome_vOTU18294	-0.2856	0.158	0.07106	0.4485	983	220
Antibiotics use	No	Yes	CRCbiome_vOTU12833	0.3583	0.2005	0.07415	0.4604	983	542
Antibiotics use	No	Yes	CRCbiome_vOTU06766	-0.2482	0.1448	0.08676	0.4933	983	466
Antibiotics use	No	Yes	CRCbiome_vOTU06779	0.3077	0.1875	0.1011	0.5006	983	237
Antibiotics use	No	Yes	CRCbiome_vOTU07437	0.1953	0.1181	0.09862	0.5006	983	163
Antibiotics use	No	Yes	CRCbiome_vOTU16515	0.1747	0.1111	0.1162	0.5259	983	139
Antibiotics use	No	Yes	CRCbiome_vOTU05594	0.1723	0.1118	0.1238	0.5363	983	141
Antibiotics use	No	Yes	CRCbiome_vOTU06510	0.1303	0.08618	0.1308	0.5432	983	110
Antibiotics use	No	Yes	CRCbiome_vOTU06695	-0.1723	0.1158	0.137	0.552	983	132
Antibiotics use	No	Yes	CRCbiome_vOTU17028	-0.2623	0.1772	0.1391	0.5531	983	278
Antibiotics use	No	Yes	CRCbiome_vOTU09503	-0.2407	0.1664	0.1484	0.5633	983	525
Antibiotics use	No	Yes	CRCbiome_vOTU15587	-0.2548	0.1767	0.1496	0.5655	983	288
Antibiotics use	No	Yes	CRCbiome_vOTU16623	0.1288	0.08961	0.1509	0.5685	983	143
Antibiotics use	No	Yes	CRCbiome_vOTU09493	-0.1724	0.121	0.1543	0.5734	983	159
Antibiotics use	No	Yes	CRCbiome_vOTU06383	-0.1614	0.1135	0.1554	0.5735	983	159
Antibiotics use	No	Yes	CRCbiome_vOTU00409	-0.1512	0.1074	0.1594	0.5809	983	146
Antibiotics use	No	Yes	CRCbiome_vOTU00063	0.1814	0.1328	0.1725	0.5887	983	186
Antibiotics use	No	Yes	CRCbiome_vOTU11017	-0.2127	0.1555	0.1715	0.5887	983	299
Antibiotics use	No	Yes	CRCbiome_vOTU11521	-0.129	0.09458	0.1729	0.5887	983	114
Antibiotics use	No	Yes	CRCbiome_vOTU16764	-0.2223	0.1625	0.1715	0.5887	983	256
Antibiotics use	No	Yes	CRCbiome_vOTU01802	-0.1442	0.1068	0.1772	0.5942	983	142
Antibiotics use	No	Yes	CRCbiome_vOTU04155	-0.1617	0.1215	0.1834	0.5975	983	145
Antibiotics use	No	Yes	CRCbiome_vOTU00300	0.1971	0.1483	0.1842	0.5986	983	125
Antibiotics use	No	Yes	CRCbiome_vOTU00279	0.1351	0.103	0.1902	0.6047	983	140
Antibiotics use	No	Yes	CRCbiome_vOTU03303	-0.1527	0.118	0.1959	0.6082	983	123
Antibiotics use	No	Yes	CRCbiome_vOTU00014	-0.2059	0.1612	0.2018	0.614	983	720
Antibiotics use	No	Yes	CRCbiome_vOTU06460	0.1363	0.1085	0.2091	0.6224	983	150
Antibiotics use	No	Yes	CRCbiome_vOTU14017	-0.1606	0.1292	0.2143	0.6281	983	175
Antibiotics use	No	Yes	CRCbiome_vOTU04326	0.1782	0.1444	0.2175	0.6322	983	141
Antibiotics use	No	Yes	CRCbiome_vOTU06147	-0.12	0.09757	0.2191	0.6322	983	114
Antibiotics use	No	Yes	CRCbiome_vOTU11362	-0.106	0.08631	0.2195	0.6322	983	99
Antibiotics use	No	Yes	CRCbiome_vOTU00236	-0.1264	0.1063	0.235	0.6515	983	123
Antibiotics use	No	Yes	CRCbiome_vOTU06243	-0.1569	0.1323	0.2359	0.6515	983	123
Antibiotics use	No	Yes	CRCbiome_vOTU18056	0.1563	0.1318	0.2362	0.6515	983	118
Antibiotics use	No	Yes	CRCbiome_vOTU17283	-0.1253	0.1075	0.2439	0.661	983	178
Antibiotics use	No	Yes	CRCbiome_vOTU16923	0.147	0.1263	0.2449	0.6625	983	169
Antibiotics use	No	Yes	CRCbiome_vOTU00076	-0.2251	0.1984	0.257	0.6735	983	439
Antibiotics use	No	Yes	CRCbiome_vOTU15475	-0.1014	0.08964	0.2582	0.6735	983	106
Antibiotics use	No	Yes	CRCbiome_vOTU06949	-0.1739	0.1596	0.2761	0.6866	983	422
Antibiotics use	No	Yes	CRCbiome_vOTU08262	0.1115	0.1036	0.2819	0.6904	983	123
Antibiotics use	No	Yes	CRCbiome_vOTU18008	-0.1325	0.1233	0.2827	0.6904	983	120
Antibiotics use	No	Yes	CRCbiome_vOTU14650	0.2449	0.2345	0.2966	0.7056	983	435
Antibiotics use	No	Yes	CRCbiome_vOTU02714	0.1456	0.1396	0.297	0.7059	983	157
Antibiotics use	No	Yes	CRCbiome_vOTU00071	-0.1323	0.1309	0.3126	0.711	983	126
Antibiotics use	No	Yes	CRCbiome_vOTU09914	-0.2031	0.2065	0.3255	0.7189	983	496
Antibiotics use	No	Yes	CRCbiome_vOTU06847	-0.1568	0.1597	0.3264	0.7201	983	540
Antibiotics use	No	Yes	CRCbiome_vOTU18323	0.1299	0.1381	0.3473	0.7393	983	150
Antibiotics use	No	Yes	CRCbiome_vOTU16292	-0.1575	0.1687	0.3509	0.7409	983	588
Antibiotics use	No	Yes	CRCbiome_vOTU07167	-0.09257	0.1017	0.3631	0.7477	983	119
Antibiotics use	No	Yes	CRCbiome_vOTU00102	0.1242	0.1403	0.3763	0.7515	983	206
Antibiotics use	No	Yes	CRCbiome_vOTU18341	-0.07825	0.08702	0.3688	0.7515	983	116
Antibiotics use	No	Yes	CRCbiome_vOTU00185	0.09274	0.1054	0.379	0.7516	983	108
Antibiotics use	No	Yes	CRCbiome_vOTU16948	-0.1393	0.163	0.393	0.7687	983	824
Antibiotics use	No	Yes	CRCbiome_vOTU01238	0.09167	0.1136	0.42	0.7877	983	151
Antibiotics use	No	Yes	CRCbiome_vOTU02518	-0.1464	0.1804	0.4172	0.7877	983	503
Antibiotics use	No	Yes	CRCbiome_vOTU06524	-0.1133	0.1397	0.4175	0.7877	983	194
Antibiotics use	No	Yes	CRCbiome_vOTU13168	0.111	0.1368	0.4173	0.7877	983	181
Antibiotics use	No	Yes	CRCbiome_vOTU12720	0.08685	0.1086	0.424	0.7902	983	114
Antibiotics use	No	Yes	CRCbiome_vOTU05051	0.08908	0.1146	0.4372	0.8035	983	152
Antibiotics use	No	Yes	CRCbiome_vOTU06837	-0.08005	0.1033	0.4386	0.8042	983	106
Antibiotics use	No	Yes	CRCbiome_vOTU06407	0.1497	0.1946	0.442	0.8046	983	285
Antibiotics use	No	Yes	CRCbiome_vOTU00495	-0.08139	0.1066	0.4452	0.8067	983	117
Antibiotics use	No	Yes	CRCbiome_vOTU07549	0.06889	0.09054	0.4469	0.8067	983	117
Antibiotics use	No	Yes	CRCbiome_vOTU18047	0.06837	0.08987	0.447	0.8067	983	102
Antibiotics use	No	Yes	CRCbiome_vOTU06961	-0.1344	0.1771	0.4481	0.8081	983	243
Antibiotics use	No	Yes	CRCbiome_vOTU11150	-0.111	0.1467	0.4494	0.8087	983	158
Antibiotics use	No	Yes	CRCbiome_vOTU04840	-0.06736	0.08982	0.4535	0.8101	983	167
Antibiotics use	No	Yes	CRCbiome_vOTU00018	0.1581	0.2161	0.4645	0.8181	983	304
Antibiotics use	No	Yes	CRCbiome_vOTU00113	0.1134	0.153	0.4589	0.8181	983	342
Antibiotics use	No	Yes	CRCbiome_vOTU02333	-0.1264	0.1716	0.4615	0.8181	983	239
Antibiotics use	No	Yes	CRCbiome_vOTU06365	-0.1242	0.1747	0.4774	0.8286	983	828
Antibiotics use	No	Yes	CRCbiome_vOTU06344	-0.08941	0.1306	0.49370000000000003	0.8347	983	266
Antibiotics use	No	Yes	CRCbiome_vOTU06206	-0.08738	0.1294	0.4996	0.8348	983	181
Antibiotics use	No	Yes	CRCbiome_vOTU05224	0.06252	0.09399	0.5061	0.838	983	103
Antibiotics use	No	Yes	CRCbiome_vOTU11258	-0.09645	0.1484	0.5158	0.8432	983	209
Antibiotics use	No	Yes	CRCbiome_vOTU11327	-0.1032	0.1602	0.5198	0.8451	983	517
Antibiotics use	No	Yes	CRCbiome_vOTU13928	0.0906	0.1439	0.5291	0.8505	983	269
Antibiotics use	No	Yes	CRCbiome_vOTU14044	0.1106	0.1774	0.5332	0.8506	983	255
Antibiotics use	No	Yes	CRCbiome_vOTU00307	-0.07433	0.123	0.5458	0.8571	983	203
Antibiotics use	No	Yes	CRCbiome_vOTU00912	-0.1038	0.1753	0.5541	0.8577	983	361
Antibiotics use	No	Yes	CRCbiome_vOTU05899	-0.08755	0.1468	0.5509	0.8577	983	151
Antibiotics use	No	Yes	CRCbiome_vOTU00579	0.07814	0.1332	0.5576	0.8586	983	211
Antibiotics use	No	Yes	CRCbiome_vOTU00335	0.1043	0.1887	0.5804	0.8655	983	392
Antibiotics use	No	Yes	CRCbiome_vOTU02986	-0.04502	0.08116	0.5792	0.8655	983	112
Antibiotics use	No	Yes	CRCbiome_vOTU18494	0.07562	0.1391	0.5868	0.8695	983	200
Antibiotics use	No	Yes	CRCbiome_vOTU18092	-0.06822	0.1269	0.5909	0.8706	983	117
Antibiotics use	No	Yes	CRCbiome_vOTU18297	0.05852	0.1169	0.6166	0.8858	983	151
Antibiotics use	No	Yes	CRCbiome_vOTU06193	0.1138	0.2353	0.6287	0.8884	983	537
Antibiotics use	No	Yes	CRCbiome_vOTU06250	-0.06704	0.1385	0.6285	0.8884	983	249
Antibiotics use	No	Yes	CRCbiome_vOTU10475	-0.07085	0.1497	0.6361	0.8889	983	175
Antibiotics use	No	Yes	CRCbiome_vOTU17956	-0.05256	0.1112	0.6364	0.8889	983	134
Antibiotics use	No	Yes	CRCbiome_vOTU06261	-0.05335	0.1157	0.6448	0.8895	983	145
Antibiotics use	No	Yes	CRCbiome_vOTU06796	0.04745	0.1051	0.6519	0.8927	983	129
Antibiotics use	No	Yes	CRCbiome_vOTU17495	-0.06335	0.142	0.6556	0.8929	983	178
Antibiotics use	No	Yes	CRCbiome_vOTU00108	-0.09052	0.2098	0.6662	0.8954	983	683
Antibiotics use	No	Yes	CRCbiome_vOTU00738	-0.05994	0.1391	0.6665	0.8954	983	135
Antibiotics use	No	Yes	CRCbiome_vOTU06201	0.04051	0.09335	0.6644	0.8954	983	103
Antibiotics use	No	Yes	CRCbiome_vOTU16284	-0.04748	0.1109	0.6687	0.8954	983	174
Antibiotics use	No	Yes	CRCbiome_vOTU11186	0.04251	0.1024	0.6781	0.9007	983	104
Antibiotics use	No	Yes	CRCbiome_vOTU07146	-0.04025	0.09794	0.6812	0.9027	983	105
Antibiotics use	No	Yes	CRCbiome_vOTU05693	-0.08903	0.2188	0.6842	0.9033	983	614
Antibiotics use	No	Yes	CRCbiome_vOTU08314	0.0663	0.1625	0.6834	0.9033	983	285
Antibiotics use	No	Yes	CRCbiome_vOTU14720	0.05873	0.1445	0.6845	0.9033	983	351
Antibiotics use	No	Yes	CRCbiome_vOTU10262	-0.07191	0.1801	0.6897	0.9073	983	401
Antibiotics use	No	Yes	CRCbiome_vOTU07045	0.03958	0.1043	0.7043	0.9106	983	141
Antibiotics use	No	Yes	CRCbiome_vOTU12609	-0.07842	0.2059	0.7033	0.9106	983	657
Antibiotics use	No	Yes	CRCbiome_vOTU13666	0.05574	0.146	0.7027	0.9106	983	369
Antibiotics use	No	Yes	CRCbiome_vOTU18353	-0.08479	0.2184	0.6979	0.9106	983	680
Antibiotics use	No	Yes	CRCbiome_vOTU18478	0.05622	0.1508	0.7093	0.9124	983	495
Antibiotics use	No	Yes	CRCbiome_vOTU17901	-0.04241	0.1207	0.7254	0.9147	983	157
Antibiotics use	No	Yes	CRCbiome_vOTU08908	-0.03494	0.101	0.7293	0.9176	983	109
Antibiotics use	No	Yes	CRCbiome_vOTU06476	-0.06387	0.1858	0.731	0.9178	983	171
Antibiotics use	No	Yes	CRCbiome_vOTU05728	-0.03401	0.1019	0.7387	0.9203	983	116
Antibiotics use	No	Yes	CRCbiome_vOTU07352	0.05106	0.1726	0.7674	0.9292	983	372
Antibiotics use	No	Yes	CRCbiome_vOTU08025	0.03663	0.1259	0.7711	0.9292	983	101
Antibiotics use	No	Yes	CRCbiome_vOTU16433	0.0256	0.0876	0.7702	0.9292	983	110
Antibiotics use	No	Yes	CRCbiome_vOTU10907	0.04926	0.1725	0.7753	0.9294	983	317
Antibiotics use	No	Yes	CRCbiome_vOTU16396	0.02944	0.11	0.7891	0.9328	983	117
Antibiotics use	No	Yes	CRCbiome_vOTU15976	0.03167	0.1231	0.797	0.9343	983	122
Antibiotics use	No	Yes	CRCbiome_vOTU14802	0.02918	0.1171	0.8033	0.9388	983	163
Antibiotics use	No	Yes	CRCbiome_vOTU17670	-0.04106	0.1681	0.807	0.9406	983	222
Antibiotics use	No	Yes	CRCbiome_vOTU04186	0.02334	0.103	0.8208	0.9463	983	118
Antibiotics use	No	Yes	CRCbiome_vOTU18455	0.02635	0.1275	0.8363	0.9522	983	121
Antibiotics use	No	Yes	CRCbiome_vOTU17445	-0.02737	0.1383	0.8431	0.9547	983	454
Antibiotics use	No	Yes	CRCbiome_vOTU00386	0.02019	0.1286	0.8753	0.9676	983	126
Antibiotics use	No	Yes	CRCbiome_vOTU06625	0.02772	0.1862	0.8817	0.969	983	303
Antibiotics use	No	Yes	CRCbiome_vOTU07583	-0.02568	0.1779	0.8853	0.9712	983	654
Antibiotics use	No	Yes	CRCbiome_vOTU05990	0.01844	0.1337	0.8903	0.9724	983	158
Antibiotics use	No	Yes	CRCbiome_vOTU08771	0.01456	0.1303	0.9111	0.9822	983	150
Antibiotics use	No	Yes	CRCbiome_vOTU00012	-0.0161	0.1492	0.9141	0.9827	983	349
Antibiotics use	No	Yes	CRCbiome_vOTU18045	-0.01763	0.1644	0.9146	0.9827	983	248
Antibiotics use	No	Yes	CRCbiome_vOTU10713	0.009923	0.1141	0.9307	0.9882	983	190
Antibiotics use	No	Yes	CRCbiome_vOTU09838	-0.01408	0.1718	0.9347	0.9882	983	697
Antibiotics use	No	Yes	CRCbiome_vOTU04991	0.008123	0.1053	0.9385	0.989	983	152
Antibiotics use	No	Yes	CRCbiome_vOTU00156	0.006954	0.1253	0.9558	0.9917	983	101
Antibiotics use	No	Yes	CRCbiome_vOTU14617	0.008005	0.1419	0.955	0.9917	983	216
Antibiotics use	No	Yes	CRCbiome_vOTU14742	-0.009254	0.1825	0.9596	0.9917	983	316
Antibiotics use	No	Yes	CRCbiome_vOTU06890	0.005997	0.1584	0.9698	0.9926	983	222
Antibiotics use	No	Yes	CRCbiome_vOTU14990	0.004366	0.1279	0.9728	0.9926	983	199
Antibiotics use	No	Yes	CRCbiome_vOTU16067	0.002742	0.07271	0.9699	0.9926	983	99
Antibiotics use	No	Yes	CRCbiome_vOTU00680	0.001762	0.1175	0.988	0.9971	983	144
Antibiotics use	No	Yes	CRCbiome_vOTU06277	0.004208	0.1924	0.9826	0.9971	983	392
Antibiotics use	No	Yes	CRCbiome_vOTU07538	-0.002266	0.1497	0.9879	0.9971	983	150
Antibiotics use	No	Yes	CRCbiome_vOTU14013	-0.001349	0.1166	0.9908	0.9972	983	224
Antibiotics use	No	Yes	CRCbiome_vOTU07547	7.264e-4	0.2007	0.9971	0.9976	983	260
Antibiotics use	No	Yes	CRCbiome_vOTU18200	7.622e-4	0.0958	0.9937	0.9976	983	106
Working status	Employed	Other	CRCbiome_vOTU16292	-0.8537	0.1937	1.163e-5	0.01077	1034	615
Working status	Employed	Other	CRCbiome_vOTU02518	-0.7916	0.2073	1.418e-4	0.02318	1034	529
Working status	Employed	Other	CRCbiome_vOTU00579	0.5384	0.1525	4.315e-4	0.0444	1034	222
Working status	Employed	Other	CRCbiome_vOTU18478	-0.5924	0.1726	6.238e-4	0.05776	1034	526
Working status	Employed	Other	CRCbiome_vOTU12609	-0.7731	0.2377	0.00118	0.07802	1034	688
Working status	Employed	Other	CRCbiome_vOTU17445	-0.5718	0.1807	0.001601	0.09029	1034	482
Working status	Employed	Other	CRCbiome_vOTU13666	-0.5225	0.1685	0.001979	0.09995	1034	390
Working status	Employed	Other	CRCbiome_vOTU01854	-0.5636	0.1897	0.003041	0.1363	1034	608
Working status	Employed	Retired	CRCbiome_vOTU06949	0.4545	0.156	0.003644	0.1489	1034	446
Working status	Employed	Retired	CRCbiome_vOTU04991	-0.2774	0.1024	0.006889	0.2036	1034	160
Working status	Employed	Retired	CRCbiome_vOTU08908	0.2689	0.09884	0.006619	0.2036	1034	117
Working status	Employed	Retired	CRCbiome_vOTU17445	-0.4108	0.1527	0.00726	0.2037	1034	482
Working status	Employed	Retired	CRCbiome_vOTU10713	0.2915	0.112	0.009348	0.2339	1034	202
Working status	Employed	Other	CRCbiome_vOTU05693	-0.6408	0.2534	0.0116	0.2498	1034	643
Working status	Employed	Retired	CRCbiome_vOTU00018	0.5223	0.2092	0.01268	0.2555	1034	316
Working status	Employed	Retired	CRCbiome_vOTU00076	0.4824	0.1928	0.0125	0.2555	1034	456
Working status	Employed	Other	CRCbiome_vOTU14720	-0.4164	0.1676	0.01315	0.2555	1034	372
Working status	Employed	Other	CRCbiome_vOTU06147	-0.2768	0.1139	0.0153	0.2707	1034	121
Working status	Employed	Other	CRCbiome_vOTU00236	-0.2942	0.1221	0.01612	0.2816	1034	128
Working status	Employed	Retired	CRCbiome_vOTU13666	-0.3425	0.1424	0.01632	0.2816	1034	390
Working status	Employed	Retired	CRCbiome_vOTU14720	-0.333	0.1417	0.01894	0.3113	1034	372
Working status	Employed	Retired	CRCbiome_vOTU15587	-0.3973	0.1724	0.02139	0.3269	1034	302
Working status	Employed	Retired	CRCbiome_vOTU06193	0.5203	0.2288	0.02314	0.3353	1034	571
Working status	Employed	Other	CRCbiome_vOTU08913	0.2497	0.1102	0.02366	0.3353	1034	159
Working status	Employed	Other	CRCbiome_vOTU03890	0.2329	0.1035	0.02467	0.3419	1034	106
Working status	Employed	Retired	CRCbiome_vOTU17028	-0.3818	0.1729	0.02745	0.3546	1034	291
Working status	Employed	Other	CRCbiome_vOTU18323	0.3467	0.1577	0.02814	0.3552	1034	153
Working status	Employed	Other	CRCbiome_vOTU11327	-0.4039	0.1843	0.02865	0.3554	1034	541
Working status	Employed	Other	CRCbiome_vOTU07624	-0.4392	0.2052	0.03253	0.3879	1034	576
Working status	Employed	Other	CRCbiome_vOTU06847	-0.3819	0.1824	0.03651	0.4123	1034	564
Working status	Employed	Other	CRCbiome_vOTU00386	-0.2985	0.1464	0.04175	0.4228	1034	130
Working status	Employed	Retired	CRCbiome_vOTU18478	-0.2931	0.1459	0.04474	0.4291	1034	526
Working status	Employed	Other	CRCbiome_vOTU02714	0.319	0.1593	0.045469999999999997	0.4315	1034	160
Working status	Employed	Other	CRCbiome_vOTU14617	0.3238	0.1619	0.0457	0.4315	1034	223
Working status	Employed	Other	CRCbiome_vOTU14796	-0.4261	0.2131	0.04583	0.4315	1034	783
Working status	Employed	Other	CRCbiome_vOTU06193	0.5401	0.2707	0.04627	0.4343	1034	571
Working status	Employed	Retired	CRCbiome_vOTU02518	-0.3375	0.1751	0.05429	0.4801	1034	529
Working status	Employed	Other	CRCbiome_vOTU04186	-0.2291	0.12	0.05646	0.4843	1034	126
Working status	Employed	Retired	CRCbiome_vOTU08913	0.175	0.09311	0.06045	0.498	1034	159
Working status	Employed	Retired	CRCbiome_vOTU11327	-0.289	0.1558	0.06381	0.5065	1034	541
Working status	Employed	Retired	CRCbiome_vOTU00300	0.2606	0.1446	0.0718	0.5178	1034	131
Working status	Employed	Retired	CRCbiome_vOTU06147	-0.1758	0.09629	0.06813	0.5178	1034	121
Working status	Employed	Retired	CRCbiome_vOTU06847	-0.2757	0.1541	0.07394	0.52	1034	564
Working status	Employed	Retired	CRCbiome_vOTU18047	0.1551	0.08785	0.07772	0.5309	1034	108
Working status	Employed	Retired	CRCbiome_vOTU06201	0.1549	0.08897	0.08196	0.5351	1034	106
Working status	Employed	Other	CRCbiome_vOTU00076	-0.3893	0.2281	0.08818	0.5475	1034	456
Working status	Employed	Retired	CRCbiome_vOTU00063	0.2187	0.1308	0.09476	0.5504	1034	197
Working status	Employed	Other	CRCbiome_vOTU05459	0.2204	0.1315	0.09408	0.5504	1034	106
Working status	Employed	Retired	CRCbiome_vOTU11258	0.2416	0.1442	0.09409	0.5504	1034	221
Working status	Employed	Other	CRCbiome_vOTU14802	-0.2192	0.1348	0.1042	0.5625	1034	174
Working status	Employed	Retired	CRCbiome_vOTU00160	0.1278	0.07893	0.1057	0.5631	1034	106
Working status	Employed	Other	CRCbiome_vOTU11521	-0.1729	0.1077	0.1087	0.5707	1034	119
Working status	Employed	Retired	CRCbiome_vOTU00279	-0.1581	0.0995	0.1123	0.5822	1034	142
Working status	Employed	Retired	CRCbiome_vOTU07624	-0.2731	0.1734	0.1155	0.5918	1034	576
Working status	Employed	Retired	CRCbiome_vOTU06407	-0.2911	0.1911	0.1279	0.6141	1034	306
Working status	Employed	Other	CRCbiome_vOTU16923	0.2223	0.1463	0.1289	0.6143	1034	179
Working status	Employed	Retired	CRCbiome_vOTU14017	0.1878	0.1249	0.1331	0.6161	1034	181
Working status	Employed	Other	CRCbiome_vOTU00185	0.1788	0.1215	0.1417	0.6337	1034	116
Working status	Employed	Other	CRCbiome_vOTU15587	-0.2954	0.204	0.1479	0.6468	1034	302
Working status	Employed	Other	CRCbiome_vOTU06243	-0.2185	0.1518	0.1504	0.6486	1034	127
Working status	Employed	Other	CRCbiome_vOTU04991	-0.1728	0.1212	0.1544	0.6531	1034	160
Working status	Employed	Other	CRCbiome_vOTU07583	-0.2916	0.2053	0.1559	0.6531	1034	686
Working status	Employed	Retired	CRCbiome_vOTU01854	-0.2261	0.1603	0.1588	0.6574	1034	608
Working status	Employed	Retired	CRCbiome_vOTU00495	0.1451	0.1044	0.1649	0.6635	1034	126
Working status	Employed	Other	CRCbiome_vOTU01802	-0.1708	0.1235	0.1671	0.6651	1034	149
Working status	Employed	Retired	CRCbiome_vOTU00335	0.247	0.1838	0.1793	0.6789	1034	412
Working status	Employed	Retired	CRCbiome_vOTU00680	0.1538	0.1135	0.176	0.6789	1034	148
Working status	Employed	Other	CRCbiome_vOTU06890	0.247	0.1828	0.1771	0.6789	1034	238
Working status	Employed	Retired	CRCbiome_vOTU09195	0.1136	0.08466	0.18	0.6789	1034	104
Working status	Employed	Retired	CRCbiome_vOTU16515	-0.1464	0.11	0.1832	0.6829	1034	148
Working status	Employed	Retired	CRCbiome_vOTU02986	0.1055	0.07993	0.1871	0.6885	1034	117
Working status	Employed	Other	CRCbiome_vOTU17028	-0.2663	0.2046	0.1934	0.6922	1034	291
Working status	Employed	Other	CRCbiome_vOTU18297	-0.1749	0.1347	0.1943	0.6922	1034	161
Working status	Employed	Other	CRCbiome_vOTU06383	-0.1658	0.1315	0.2077	0.7025	1034	168
Working status	Employed	Retired	CRCbiome_vOTU07146	0.1161	0.09424	0.2183	0.7025	1034	109
Working status	Employed	Other	CRCbiome_vOTU10262	0.2576	0.2055	0.2102	0.7025	1034	419
Working status	Employed	Other	CRCbiome_vOTU11017	-0.2245	0.1801	0.213	0.7025	1034	317
Working status	Employed	Other	CRCbiome_vOTU14742	0.2585	0.21	0.2185	0.7025	1034	330
Working status	Employed	Retired	CRCbiome_vOTU18092	0.1545	0.125	0.2167	0.7025	1034	124
Working status	Employed	Retired	CRCbiome_vOTU04840	-0.106	0.08765	0.227	0.7031	1034	175
Working status	Employed	Other	CRCbiome_vOTU06261	-0.161	0.1322	0.2233	0.7031	1034	152
Working status	Employed	Other	CRCbiome_vOTU17956	-0.1547	0.1265	0.2218	0.7031	1034	138
Working status	Employed	Other	CRCbiome_vOTU00014	-0.223	0.186	0.231	0.7038	1034	760
Working status	Employed	Other	CRCbiome_vOTU00409	0.1474	0.1236	0.2331	0.7038	1034	154
Working status	Employed	Other	CRCbiome_vOTU04840	-0.1248	0.1037	0.2292	0.7038	1034	175
Working status	Employed	Retired	CRCbiome_vOTU06524	0.1629	0.1365	0.2329	0.7038	1034	206
Working status	Employed	Retired	CRCbiome_vOTU14013	-0.1351	0.1127	0.231	0.7038	1034	234
Working status	Employed	Other	CRCbiome_vOTU14650	0.3173	0.2716	0.2431	0.7168	1034	463
Working status	Employed	Other	CRCbiome_vOTU18056	0.1762	0.1507	0.2427	0.7168	1034	122
Working status	Employed	Retired	CRCbiome_vOTU11362	0.09792	0.0841	0.2445	0.7169	1034	105
Working status	Employed	Retired	CRCbiome_vOTU16292	-0.1904	0.1637	0.2451	0.7169	1034	615
Working status	Employed	Retired	CRCbiome_vOTU05693	-0.2483	0.2141	0.2464	0.7175	1034	643
Working status	Employed	Retired	CRCbiome_vOTU00738	0.1566	0.1357	0.2488	0.7189	1034	140
Working status	Employed	Retired	CRCbiome_vOTU12609	-0.232	0.2008	0.2482	0.7189	1034	688
Working status	Employed	Retired	CRCbiome_vOTU05990	0.1495	0.1301	0.2508	0.7192	1034	166
Working status	Employed	Other	CRCbiome_vOTU06625	0.2489	0.2164	0.2502	0.7192	1034	318
Working status	Employed	Other	CRCbiome_vOTU09493	-0.1581	0.1399	0.2589	0.7298	1034	168
Working status	Employed	Retired	CRCbiome_vOTU00071	-0.1422	0.1271	0.2635	0.7319	1034	132
Working status	Employed	Retired	CRCbiome_vOTU17956	0.1186	0.1069	0.2676	0.7359	1034	138
Working status	Employed	Retired	CRCbiome_vOTU06961	0.1881	0.1715	0.2731	0.7385	1034	256
Working status	Employed	Retired	CRCbiome_vOTU18494	-0.1497	0.1365	0.2731	0.7385	1034	210
Working status	Employed	Other	CRCbiome_vOTU00738	-0.1754	0.1606	0.275	0.7396	1034	140
Working status	Employed	Retired	CRCbiome_vOTU06510	-0.09306	0.08536	0.2759	0.7398	1034	118
Working status	Employed	Other	CRCbiome_vOTU06476	0.2359	0.2171	0.2777	0.7413	1034	183
Working status	Employed	Other	CRCbiome_vOTU16515	-0.1406	0.1301	0.2801	0.7433	1034	148
Working status	Employed	Retired	CRCbiome_vOTU07549	-0.09496	0.08857	0.2839	0.7476	1034	124
Working status	Employed	Retired	CRCbiome_vOTU06625	0.1952	0.1829	0.2861	0.7518	1034	318
Working status	Employed	Other	CRCbiome_vOTU14013	-0.1421	0.1334	0.2871	0.7529	1034	234
Working status	Employed	Other	CRCbiome_vOTU07045	-0.1268	0.1196	0.289	0.7552	1034	149
Working status	Employed	Retired	CRCbiome_vOTU16948	-0.1672	0.1589	0.2931	0.7573	1034	866
Working status	Employed	Retired	CRCbiome_vOTU00386	-0.1287	0.1237	0.2986	0.7618	1034	130
Working status	Employed	Retired	CRCbiome_vOTU06695	0.1159	0.1114	0.2984	0.7618	1034	136
Working status	Employed	Retired	CRCbiome_vOTU05728	0.102	0.09814	0.2991	0.7622	1034	118
Working status	Employed	Retired	CRCbiome_vOTU05224	-0.0959	0.09268	0.301	0.7646	1034	108
Working status	Employed	Retired	CRCbiome_vOTU07045	-0.1044	0.101	0.3015	0.7649	1034	149
Working status	Employed	Retired	CRCbiome_vOTU07167	-0.1014	0.09852	0.3037	0.7685	1034	123
Working status	Employed	Other	CRCbiome_vOTU14044	-0.2111	0.2071	0.3083	0.7692	1034	277
Working status	Employed	Retired	CRCbiome_vOTU07538	0.1467	0.1456	0.3141	0.7695	1034	158
Working status	Employed	Retired	CRCbiome_vOTU04326	-0.1402	0.1396	0.3155	0.7702	1034	149
Working status	Employed	Retired	CRCbiome_vOTU16623	-0.08897	0.08856	0.3153	0.7702	1034	152
Working status	Employed	Retired	CRCbiome_vOTU06365	-0.17	0.1704	0.3188	0.7747	1034	870
Working status	Employed	Retired	CRCbiome_vOTU08314	-0.1562	0.1584	0.3242	0.7772	1034	300
Working status	Employed	Retired	CRCbiome_vOTU16396	-0.106	0.1071	0.3226	0.7772	1034	124
Working status	Employed	Other	CRCbiome_vOTU00063	0.1524	0.1547	0.3248	0.7778	1034	197
Working status	Employed	Other	CRCbiome_vOTU06250	-0.1567	0.1602	0.3282	0.7818	1034	263
Working status	Employed	Other	CRCbiome_vOTU09838	-0.1909	0.1978	0.3348	0.7828	1034	731
Working status	Employed	Retired	CRCbiome_vOTU00185	0.09834	0.1027	0.3386	0.7858	1034	116
Working status	Employed	Other	CRCbiome_vOTU16396	-0.1185	0.1267	0.3499	0.7948	1034	124
Working status	Employed	Retired	CRCbiome_vOTU11150	0.1336	0.143	0.3502	0.7949	1034	167
Working status	Employed	Retired	CRCbiome_vOTU16764	0.1464	0.1583	0.3553	0.7972	1034	269
Working status	Employed	Retired	CRCbiome_vOTU06476	0.1668	0.1835	0.3634	0.8023	1034	183
Working status	Employed	Retired	CRCbiome_vOTU09838	0.1506	0.1672	0.3679	0.8023	1034	731
Working status	Employed	Retired	CRCbiome_vOTU17495	-0.1224	0.1364	0.3698	0.8023	1034	183
Working status	Employed	Retired	CRCbiome_vOTU05899	0.126	0.1427	0.3773	0.8049	1034	158
Working status	Employed	Retired	CRCbiome_vOTU12720	0.0921	0.1047	0.3793	0.8059	1034	119
Working status	Employed	Retired	CRCbiome_vOTU02714	0.1171	0.1346	0.3847	0.812	1034	160
Working status	Employed	Other	CRCbiome_vOTU06779	0.1867	0.2175	0.3909	0.8177	1034	252
Working status	Employed	Other	CRCbiome_vOTU09195	0.08607	0.1002	0.3905	0.8177	1034	104
Working status	Employed	Retired	CRCbiome_vOTU09503	-0.1392	0.1624	0.3915	0.8177	1034	551
Working status	Employed	Retired	CRCbiome_vOTU10907	0.1435	0.1692	0.3965	0.8202	1034	337
Working status	Employed	Other	CRCbiome_vOTU18008	0.1184	0.1401	0.3984	0.8207	1034	125
Working status	Employed	Other	CRCbiome_vOTU00335	0.1835	0.2175	0.3991	0.8212	1034	412
Working status	Employed	Other	CRCbiome_vOTU08771	0.1263	0.1507	0.402	0.8223	1034	157
Working status	Employed	Other	CRCbiome_vOTU11186	0.1004	0.1199	0.4023	0.8224	1034	112
Working status	Employed	Other	CRCbiome_vOTU00912	0.1678	0.203	0.4085	0.8235	1034	383
Working status	Employed	Retired	CRCbiome_vOTU06261	-0.09241	0.1117	0.4082	0.8235	1034	152
Working status	Employed	Retired	CRCbiome_vOTU10262	0.1439	0.1736	0.4073	0.8235	1034	419
Working status	Employed	Retired	CRCbiome_vOTU00307	0.09874	0.1198	0.41	0.8243	1034	213
Working status	Employed	Retired	CRCbiome_vOTU12833	0.1614	0.1963	0.4112	0.8243	1034	573
Working status	Employed	Other	CRCbiome_vOTU00012	-0.1411	0.1724	0.4134	0.8256	1034	366
Working status	Employed	Other	CRCbiome_vOTU09503	-0.1567	0.1922	0.415	0.8258	1034	551
Working status	Employed	Retired	CRCbiome_vOTU00014	-0.127	0.1572	0.4195	0.8277	1034	760
Working status	Employed	Other	CRCbiome_vOTU07167	-0.09407	0.1166	0.42	0.8277	1034	123
Working status	Employed	Other	CRCbiome_vOTU12720	0.09958	0.1239	0.4218	0.8281	1034	119
Working status	Employed	Retired	CRCbiome_vOTU00156	-0.09746	0.1217	0.4236	0.8295	1034	107
Working status	Employed	Other	CRCbiome_vOTU00018	0.1973	0.2475	0.4255	0.8313	1034	316
Working status	Employed	Other	CRCbiome_vOTU06796	-0.09599	0.1211	0.4283	0.8326	1034	135
Working status	Employed	Other	CRCbiome_vOTU13168	-0.1262	0.1609	0.4331	0.8335	1034	195
Working status	Employed	Retired	CRCbiome_vOTU00113	0.1166	0.1504	0.4386	0.8349	1034	363
Working status	Employed	Other	CRCbiome_vOTU00160	0.07237	0.0934	0.4386	0.8349	1034	106
Working status	Employed	Retired	CRCbiome_vOTU14650	0.1774	0.2296	0.4398	0.8349	1034	463
Working status	Employed	Retired	CRCbiome_vOTU18045	-0.1241	0.1604	0.4393	0.8349	1034	261
Working status	Employed	Other	CRCbiome_vOTU05728	-0.08478	0.1161	0.4656	0.8454	1034	118
Working status	Employed	Retired	CRCbiome_vOTU13168	-0.09879	0.136	0.4677	0.8454	1034	195
Working status	Employed	Retired	CRCbiome_vOTU00012	-0.1054	0.1457	0.4695	0.8481	1034	366
Working status	Employed	Other	CRCbiome_vOTU05899	0.1218	0.1688	0.4707	0.8493	1034	158
Working status	Employed	Retired	CRCbiome_vOTU07583	-0.1251	0.1735	0.4711	0.8493	1034	686
Working status	Employed	Other	CRCbiome_vOTU00156	0.1038	0.1441	0.4715	0.8495	1034	107
Working status	Employed	Other	CRCbiome_vOTU08262	-0.08524	0.1196	0.4761	0.8549	1034	131
Working status	Employed	Other	CRCbiome_vOTU00300	0.1213	0.1711	0.4786	0.8578	1034	131
Working status	Employed	Retired	CRCbiome_vOTU14044	-0.1231	0.175	0.482	0.8584	1034	277
Working status	Employed	Other	CRCbiome_vOTU11150	-0.1181	0.1692	0.4853	0.8615	1034	167
Working status	Employed	Other	CRCbiome_vOTU07547	0.1604	0.2336	0.4923	0.8683	1034	275
Working status	Employed	Other	CRCbiome_vOTU06201	0.07156	0.1053	0.4969	0.8713	1034	106
Working status	Employed	Retired	CRCbiome_vOTU06779	0.1253	0.1838	0.4958	0.8713	1034	252
Working status	Employed	Other	CRCbiome_vOTU17901	-0.0925	0.1371	0.5001	0.8732	1034	163
Working status	Employed	Other	CRCbiome_vOTU05594	0.08632	0.1289	0.5033	0.8746	1034	148
Working status	Employed	Other	CRCbiome_vOTU06949	0.1229	0.1845	0.5056	0.8746	1034	446
Working status	Employed	Other	CRCbiome_vOTU13928	-0.1126	0.1687	0.5046	0.8746	1034	289
Working status	Employed	Retired	CRCbiome_vOTU16923	-0.08285	0.1236	0.5029	0.8746	1034	179
Working status	Employed	Other	CRCbiome_vOTU10907	0.129	0.2002	0.5196	0.8763	1034	337
Working status	Employed	Other	CRCbiome_vOTU17495	-0.1052	0.1614	0.5149	0.8763	1034	183
Working status	Employed	Other	CRCbiome_vOTU06344	-0.0957	0.1515	0.5277	0.8779	1034	281
Working status	Employed	Retired	CRCbiome_vOTU04155	-0.07476	0.1189	0.5296	0.8783	1034	154
Working status	Employed	Other	CRCbiome_vOTU06695	-0.08102	0.1318	0.5388	0.8812	1034	136
Working status	Employed	Other	CRCbiome_vOTU18455	0.08846	0.1461	0.5449	0.8826	1034	125
Working status	Employed	Other	CRCbiome_vOTU00102	0.1043	0.1757	0.5529	0.884	1034	216
Working status	Employed	Other	CRCbiome_vOTU00307	-0.08427	0.1418	0.5524	0.884	1034	213
Working status	Employed	Retired	CRCbiome_vOTU18200	-0.05232	0.09293	0.5735	0.8902	1034	109
Working status	Employed	Other	CRCbiome_vOTU15035	-0.1011	0.1811	0.5769	0.8909	1034	563
Working status	Employed	Other	CRCbiome_vOTU02986	-0.05097	0.09458	0.5901	0.8929	1034	117
Working status	Employed	Retired	CRCbiome_vOTU06250	-0.0748	0.1354	0.5807	0.8929	1034	263
Working status	Employed	Other	CRCbiome_vOTU06277	0.12	0.222	0.589	0.8929	1034	410
Working status	Employed	Other	CRCbiome_vOTU16948	-0.1032	0.1881	0.5833	0.8929	1034	866
Working status	Employed	Retired	CRCbiome_vOTU17423	0.06379	0.1196	0.5939	0.8929	1034	180
Working status	Employed	Other	CRCbiome_vOTU06524	-0.08471	0.1615	0.6	0.8968	1034	206
Working status	Employed	Retired	CRCbiome_vOTU04186	-0.05221	0.1014	0.6067	0.8987	1034	126
Working status	Employed	Other	CRCbiome_vOTU00113	0.08956	0.178	0.615	0.9011	1034	363
Working status	Employed	Retired	CRCbiome_vOTU06890	0.0775	0.1545	0.6161	0.9011	1034	238
Working status	Employed	Other	CRCbiome_vOTU16360	-0.09408	0.1867	0.6145	0.9011	1034	419
Working status	Employed	Retired	CRCbiome_vOTU18323	0.0669	0.1333	0.6157	0.9011	1034	153
Working status	Employed	Other	CRCbiome_vOTU00071	-0.07207	0.1504	0.6319	0.9022	1034	132
Working status	Employed	Other	CRCbiome_vOTU05990	0.07505	0.154	0.6261	0.9022	1034	166
Working status	Employed	Retired	CRCbiome_vOTU01238	-0.05301	0.1112	0.6338	0.9033	1034	158
Working status	Employed	Retired	CRCbiome_vOTU18455	-0.05857	0.1234	0.6352	0.904	1034	125
Working status	Employed	Other	CRCbiome_vOTU01238	-0.06212	0.1316	0.6371	0.9045	1034	158
Working status	Employed	Retired	CRCbiome_vOTU00102	-0.06908	0.1485	0.6418	0.9058	1034	216
Working status	Employed	Other	CRCbiome_vOTU05224	0.05085	0.1097	0.643	0.9058	1034	108
Working status	Employed	Other	CRCbiome_vOTU06136	0.05228	0.1147	0.6486	0.9068	1034	104
Working status	Employed	Retired	CRCbiome_vOTU18294	-0.07155	0.1568	0.6483	0.9068	1034	237
Working status	Employed	Retired	CRCbiome_vOTU06136	-0.04406	0.09691	0.6495	0.9068	1034	104
Working status	Employed	Retired	CRCbiome_vOTU07352	0.0751	0.1677	0.6544	0.9103	1034	387
Working status	Employed	Retired	CRCbiome_vOTU15976	0.05337	0.1195	0.6552	0.9103	1034	131
Working status	Employed	Retired	CRCbiome_vOTU06277	0.08212	0.1876	0.6616	0.9147	1034	410
Working status	Employed	Other	CRCbiome_vOTU18092	-0.06452	0.1479	0.6627	0.915	1034	124
Working status	Employed	Other	CRCbiome_vOTU06365	-0.08384	0.2017	0.6777	0.9164	1034	870
Working status	Employed	Retired	CRCbiome_vOTU06460	0.04361	0.1071	0.6839	0.9164	1034	159
Working status	Employed	Other	CRCbiome_vOTU07352	0.08447	0.1984	0.6705	0.9164	1034	387
Working status	Employed	Other	CRCbiome_vOTU07538	0.07251	0.1723	0.674	0.9164	1034	158
Working status	Employed	Retired	CRCbiome_vOTU09493	-0.05091	0.1183	0.6669	0.9164	1034	168
Working status	Employed	Retired	CRCbiome_vOTU10475	0.05974	0.1454	0.6812	0.9164	1034	184
Working status	Employed	Other	CRCbiome_vOTU11258	0.07309	0.1706	0.6684	0.9164	1034	221
Working status	Employed	Other	CRCbiome_vOTU12833	0.09308	0.2323	0.6887	0.9164	1034	573
Working status	Employed	Retired	CRCbiome_vOTU14742	-0.0731	0.1775	0.6805	0.9164	1034	330
Working status	Employed	Retired	CRCbiome_vOTU18056	-0.05185	0.1274	0.684	0.9164	1034	122
Working status	Employed	Retired	CRCbiome_vOTU18353	0.08875	0.213	0.6771	0.9164	1034	715
Working status	Employed	Other	CRCbiome_vOTU05051	-0.05172	0.1322	0.6958	0.9204	1034	158
Working status	Employed	Retired	CRCbiome_vOTU05459	0.04294	0.1111	0.6993	0.9231	1034	106
Working status	Employed	Other	CRCbiome_vOTU07437	-0.05165	0.1368	0.7058	0.9231	1034	171
Working status	Employed	Retired	CRCbiome_vOTU16284	-0.03885	0.1074	0.7177	0.927	1034	179
Working status	Employed	Retired	CRCbiome_vOTU06243	-0.04544	0.1283	0.7233	0.9275	1034	127
Working status	Employed	Retired	CRCbiome_vOTU16360	0.05588	0.1578	0.7233	0.9275	1034	419
Working status	Employed	Retired	CRCbiome_vOTU00579	0.04465	0.1288	0.729	0.928	1034	222
Working status	Employed	Other	CRCbiome_vOTU06460	0.04339	0.1267	0.7321	0.928	1034	159
Working status	Employed	Other	CRCbiome_vOTU04155	-0.04626	0.1407	0.7423	0.9338	1034	154
Working status	Employed	Other	CRCbiome_vOTU07146	0.03583	0.1115	0.7481	0.9369	1034	109
Working status	Employed	Retired	CRCbiome_vOTU08262	0.03229	0.101	0.7494	0.937	1034	131
Working status	Employed	Retired	CRCbiome_vOTU14990	0.03902	0.1251	0.7553	0.9394	1034	214
Working status	Employed	Other	CRCbiome_vOTU17670	-0.05967	0.1929	0.7571	0.9398	1034	231
Working status	Employed	Other	CRCbiome_vOTU18294	-0.05748	0.1855	0.7568	0.9398	1034	237
Working status	Employed	Retired	CRCbiome_vOTU14796	-0.0553	0.1801	0.7588	0.9398	1034	783
Working status	Employed	Retired	CRCbiome_vOTU00108	0.06267	0.206	0.761	0.9399	1034	716
Working status	Employed	Other	CRCbiome_vOTU02333	-0.05894	0.1986	0.7667	0.9399	1034	250
Working status	Employed	Other	CRCbiome_vOTU11362	-0.02952	0.09951	0.7668	0.9399	1034	105
Working status	Employed	Retired	CRCbiome_vOTU14163	-0.05093	0.1753	0.7715	0.9419	1034	368
Working status	Employed	Other	CRCbiome_vOTU00279	-0.0341	0.1177	0.7722	0.942	1034	142
Working status	Employed	Retired	CRCbiome_vOTU07547	0.05701	0.1974	0.7727	0.942	1034	275
Working status	Employed	Other	CRCbiome_vOTU18200	-0.03119	0.11	0.7767	0.9431	1034	109
Working status	Employed	Retired	CRCbiome_vOTU02333	-0.0464	0.1678	0.7822	0.9432	1034	250
Working status	Employed	Other	CRCbiome_vOTU16764	-0.05196	0.1874	0.7816	0.9432	1034	269
Working status	Employed	Retired	CRCbiome_vOTU05594	-0.02881	0.109	0.7915	0.9451	1034	148
Working status	Employed	Other	CRCbiome_vOTU06407	-0.05757	0.2261	0.7991	0.9451	1034	306
Working status	Employed	Other	CRCbiome_vOTU06510	-0.0271	0.101	0.7885	0.9451	1034	118
Working status	Employed	Retired	CRCbiome_vOTU06837	0.02698	0.09969	0.7867	0.9451	1034	110
Working status	Employed	Other	CRCbiome_vOTU07549	-0.02658	0.1048	0.79990000000000006	0.9451	1034	124
Working status	Employed	Retired	CRCbiome_vOTU08025	-0.0312	0.1215	0.7974	0.9451	1034	104
Working status	Employed	Retired	CRCbiome_vOTU16433	0.02222	0.08448	0.7926	0.9451	1034	115
Working status	Employed	Retired	CRCbiome_vOTU17670	0.042	0.163	0.7967	0.9451	1034	231
Working status	Employed	Other	CRCbiome_vOTU08314	0.04639	0.1875	0.8046	0.9483	1034	300
Working status	Employed	Other	CRCbiome_vOTU06766	-0.04055	0.1676	0.8088	0.9508	1034	491
Working status	Employed	Retired	CRCbiome_vOTU00236	0.02463	0.1032	0.8113	0.951	1034	128
Working status	Employed	Other	CRCbiome_vOTU06961	-0.04868	0.203	0.8105	0.951	1034	256
Working status	Employed	Retired	CRCbiome_vOTU08771	-0.02964	0.1273	0.816	0.9516	1034	157
Working status	Employed	Retired	CRCbiome_vOTU00409	0.0242	0.1044	0.8168	0.9518	1034	154
Working status	Employed	Other	CRCbiome_vOTU00108	-0.05609	0.2437	0.8181	0.9521	1034	716
Working status	Employed	Other	CRCbiome_vOTU00680	0.03026	0.1344	0.8219	0.9537	1034	148
Working status	Employed	Other	CRCbiome_vOTU14990	0.03303	0.1481	0.8235	0.9537	1034	214
Working status	Employed	Other	CRCbiome_vOTU15475	-0.02119	0.1017	0.8351	0.9569	1034	108
Working status	Employed	Other	CRCbiome_vOTU17423	-0.02884	0.1415	0.8386	0.9575	1034	180
Working status	Employed	Retired	CRCbiome_vOTU18341	-0.01673	0.08505	0.8441	0.9597	1034	122
Working status	Employed	Retired	CRCbiome_vOTU13928	0.02731	0.1425	0.8481	0.9625	1034	289
Working status	Employed	Retired	CRCbiome_vOTU18008	-0.02224	0.1184	0.851	0.9639	1034	125
Working status	Employed	Retired	CRCbiome_vOTU03890	0.0161	0.08748	0.854	0.964	1034	106
Working status	Employed	Retired	CRCbiome_vOTU06383	0.02037	0.1112	0.8546	0.9643	1034	168
Working status	Employed	Retired	CRCbiome_vOTU06796	0.01817	0.1024	0.8592	0.9668	1034	135
Working status	Employed	Other	CRCbiome_vOTU14017	-0.02508	0.1478	0.8653	0.9692	1034	181
Working status	Employed	Retired	CRCbiome_vOTU14617	0.0213	0.1368	0.8763	0.9746	1034	223
Working status	Employed	Retired	CRCbiome_vOTU06344	-0.01935	0.128	0.8799	0.9759	1034	281
Working status	Employed	Retired	CRCbiome_vOTU09914	-0.03085	0.2022	0.8788	0.9759	1034	515
Working status	Employed	Other	CRCbiome_vOTU06206	-0.02127	0.1482	0.8859	0.9801	1034	189
Working status	Employed	Other	CRCbiome_vOTU17283	-0.01739	0.1237	0.8882	0.9809	1034	183
Working status	Employed	Other	CRCbiome_vOTU18045	0.0268	0.1898	0.8877	0.9809	1034	261
Working status	Employed	Retired	CRCbiome_vOTU03303	-0.01582	0.1139	0.8896	0.981	1034	126
Working status	Employed	Other	CRCbiome_vOTU03303	-0.01787	0.1348	0.8946	0.9829	1034	126
Working status	Employed	Retired	CRCbiome_vOTU11521	0.01191	0.091	0.8959	0.9829	1034	119
Working status	Employed	Other	CRCbiome_vOTU16623	0.01318	0.1048	0.8999	0.9839	1034	152
Working status	Employed	Retired	CRCbiome_vOTU00912	0.01996	0.1715	0.9074	0.9842	1034	383
Working status	Employed	Other	CRCbiome_vOTU09914	-0.02649	0.2393	0.9119	0.9842	1034	515
Working status	Employed	Retired	CRCbiome_vOTU11017	-0.01677	0.1522	0.9123	0.9842	1034	317
Working status	Employed	Retired	CRCbiome_vOTU15475	0.008941	0.08597	0.9172	0.9842	1034	108
Working status	Employed	Other	CRCbiome_vOTU15976	0.01619	0.1414	0.9089	0.9842	1034	131
Working status	Employed	Other	CRCbiome_vOTU18353	-0.02678	0.2521	0.9154	0.9842	1034	715
Working status	Employed	Retired	CRCbiome_vOTU06206	-0.01235	0.1252	0.9214	0.986	1034	189
Working status	Employed	Other	CRCbiome_vOTU00495	-0.01156	0.1236	0.9255	0.9877	1034	126
Working status	Employed	Other	CRCbiome_vOTU10475	0.01413	0.172	0.9346	0.9917	1034	184
Working status	Employed	Retired	CRCbiome_vOTU05051	-0.008752	0.1117	0.9376	0.9926	1034	158
Working status	Employed	Other	CRCbiome_vOTU10713	-0.01003	0.1325	0.9397	0.9928	1034	202
Working status	Employed	Other	CRCbiome_vOTU18494	0.01212	0.1615	0.9402	0.9928	1034	210
Working status	Employed	Retired	CRCbiome_vOTU07437	-0.007976	0.1156	0.945	0.9929	1034	171
Working status	Employed	Other	CRCbiome_vOTU06837	0.007796	0.118	0.9473	0.9935	1034	110
Working status	Employed	Retired	CRCbiome_vOTU06766	0.007028	0.1416	0.9604	0.9947	1034	491
Working status	Employed	Retired	CRCbiome_vOTU11186	-0.004802	0.1013	0.9622	0.9947	1034	112
Working status	Employed	Retired	CRCbiome_vOTU14802	-0.006264	0.1139	0.9562	0.9947	1034	174
Working status	Employed	Other	CRCbiome_vOTU16284	0.007103	0.1271	0.9555	0.9947	1034	179
Working status	Employed	Retired	CRCbiome_vOTU15035	-0.005874	0.15310000000000001	0.9694	0.9948	1034	563
Working status	Employed	Other	CRCbiome_vOTU14163	-0.007488	0.2075	0.9712	0.9956	1034	368
Working status	Employed	Other	CRCbiome_vOTU18047	0.003311	0.104	0.9746	0.9959	1034	108
Working status	Employed	Other	CRCbiome_vOTU04326	0.003507	0.1652	0.9831	0.9974	1034	149
Working status	Employed	Other	CRCbiome_vOTU08025	-0.002945	0.1438	0.9837	0.9974	1034	104
Working status	Employed	Other	CRCbiome_vOTU08908	-0.002366	0.117	0.9839	0.9974	1034	117
Working status	Employed	Retired	CRCbiome_vOTU17901	0.002844	0.1159	0.9804	0.9974	1034	163
Working status	Employed	Retired	CRCbiome_vOTU01802	-0.001062	0.1044	0.9919	0.9993	1034	149
Working status	Employed	Other	CRCbiome_vOTU16433	-0.001067	0.09997	0.9915	0.9993	1034	115
Working status	Employed	Retired	CRCbiome_vOTU18297	0.001158	0.1138	0.9919	0.9993	1034	161
Working status	Employed	Other	CRCbiome_vOTU18341	0.001463	0.1006	0.9884	0.9993	1034	122
Working status	Employed	Retired	CRCbiome_vOTU17283	-7.013e-5	0.1045	0.9995	0.9997	1034	183
BMI	low	b_high	CRCbiome_vOTU06365	0.4607	0.1427	0.001306	0.1536	623	514
BMI	low	b_high	CRCbiome_vOTU10262	0.5056	0.1618	0.001866	0.1686	623	254
BMI	low	b_high	CRCbiome_vOTU00012	-0.3873	0.1332	0.003785	0.1856	623	231
BMI	low	b_high	CRCbiome_vOTU16948	0.4194	0.1445	0.003831	0.1856	623	510
BMI	low	b_high	CRCbiome_vOTU07352	0.3951	0.1532	0.01015	0.2625	623	223
BMI	low	b_high	CRCbiome_vOTU04991	0.2291	0.09146	0.01252	0.2744	623	92
BMI	low	b_high	CRCbiome_vOTU04326	0.3101	0.1275	0.01531	0.2896	623	90
BMI	low	b_high	CRCbiome_vOTU02986	-0.1708	0.0746	0.02236	0.3572	623	72
BMI	low	b_high	CRCbiome_vOTU06890	0.295	0.1316	0.02531	0.3628	623	135
BMI	low	b_high	CRCbiome_vOTU14650	0.388	0.1765	0.02831	0.3754	623	282
BMI	low	b_high	CRCbiome_vOTU06476	0.2875	0.1313	0.02895	0.3777	623	109
BMI	low	b_high	CRCbiome_vOTU00063	0.2356	0.1097	0.03209	0.3937	623	117
BMI	low	b_high	CRCbiome_vOTU18353	0.4078	0.1933	0.03533	0.4092	623	440
BMI	low	b_high	CRCbiome_vOTU00018	0.4039	0.1943	0.03802	0.415	623	189
BMI	low	b_high	CRCbiome_vOTU00300	0.2575	0.1297	0.0475	0.453	623	72
BMI	low	b_high	CRCbiome_vOTU08262	0.1694	0.08558	0.04826	0.4553	623	67
BMI	low	b_high	CRCbiome_vOTU06136	0.1689	0.08636	0.05088	0.4601	623	66
BMI	low	b_high	CRCbiome_vOTU11521	-0.1666	0.08527	0.05125	0.4601	623	70
BMI	low	b_high	CRCbiome_vOTU01854	-0.2865	0.1476	0.05273	0.4631	623	353
BMI	low	b_high	CRCbiome_vOTU06193	0.4058	0.2091	0.0528	0.4631	623	351
BMI	low	b_high	CRCbiome_vOTU00185	0.1645	0.0851	0.05362	0.4663	623	65
BMI	low	b_high	CRCbiome_vOTU17283	-0.1654	0.08549	0.05344	0.4663	623	102
BMI	low	b_high	CRCbiome_vOTU11017	-0.2123	0.1156	0.06674	0.4851	623	184
BMI	low	b_high	CRCbiome_vOTU14044	0.2684	0.1463	0.06701	0.4851	623	164
BMI	low	b_high	CRCbiome_vOTU15475	0.143	0.07808	0.0675	0.4851	623	65
BMI	low	b_high	CRCbiome_vOTU07538	-0.223	0.1222	0.06857	0.4864	623	100
BMI	low	b_high	CRCbiome_vOTU00495	-0.1703	0.09495	0.07342	0.4975	623	72
BMI	low	b_high	CRCbiome_vOTU02518	-0.2762	0.16	0.08477	0.5153	623	315
BMI	low	b_high	CRCbiome_vOTU13928	0.2192	0.1292	0.09025	0.5153	623	175
BMI	low	b_high	CRCbiome_vOTU14617	0.2148	0.1228	0.08082	0.5153	623	127
BMI	low	b_high	CRCbiome_vOTU00738	-0.1675	0.09956	0.093	0.5186	623	83
BMI	low	b_high	CRCbiome_vOTU07167	-0.1414	0.08507	0.09691	0.522	623	72
BMI	low	b_high	CRCbiome_vOTU06407	0.2856	0.1732	0.09973	0.524	623	188
BMI	low	b_high	CRCbiome_vOTU05990	-0.1958	0.1243	0.1156	0.5446	623	111
BMI	low	b_high	CRCbiome_vOTU11258	-0.2052	0.1369	0.1343	0.5674	623	137
BMI	low	b_high	CRCbiome_vOTU18341	-0.109	0.07273	0.1345	0.5674	623	68
BMI	low	b_high	CRCbiome_vOTU16284	-0.1283	0.08646	0.1383	0.5689	623	113
BMI	low	b_high	CRCbiome_vOTU05899	-0.1769	0.1199	0.1407	0.5733	623	99
BMI	low	b_high	CRCbiome_vOTU04155	0.1579	0.1088	0.1471	0.5858	623	87
BMI	low	b_high	CRCbiome_vOTU00579	0.1561	0.1083	0.1499	0.5882	623	142
BMI	low	b_high	CRCbiome_vOTU00307	0.1575	0.1094	0.1506	0.5882	623	127
BMI	low	b_high	CRCbiome_vOTU00076	-0.2542	0.1783	0.1545	0.5966	623	267
BMI	low	b_high	CRCbiome_vOTU06206	-0.1614	0.1137	0.1564	0.5975	623	110
BMI	low	b_high	CRCbiome_vOTU06766	-0.1774	0.1254	0.1577	0.5975	623	295
BMI	low	b_high	CRCbiome_vOTU14990	0.157	0.112	0.1615	0.6009	623	123
BMI	low	b_high	CRCbiome_vOTU09395	-0.09851	0.07078	0.1645	0.6029	623	68
BMI	low	b_high	CRCbiome_vOTU00102	0.1865	0.1366	0.1728	0.6089	623	137
BMI	low	b_high	CRCbiome_vOTU16292	-0.1926	0.1402	0.1701	0.6089	623	375
BMI	low	b_high	CRCbiome_vOTU18056	0.1595	0.1164	0.1712	0.6089	623	82
BMI	low	b_high	CRCbiome_vOTU07549	-0.1133	0.08359	0.1758	0.6109	623	82
BMI	low	b_high	CRCbiome_vOTU13168	0.1642	0.1218	0.1783	0.6123	623	115
BMI	low	b_high	CRCbiome_vOTU17423	-0.1421	0.106	0.1806	0.6154	623	101
BMI	low	b_high	CRCbiome_vOTU09838	0.1933	0.1452	0.1838	0.6173	623	440
BMI	low	b_high	CRCbiome_vOTU09914	0.2412	0.1818	0.1851	0.6199	623	304
BMI	low	b_high	CRCbiome_vOTU08314	0.1879	0.1425	0.1879	0.6213	623	169
BMI	low	b_high	CRCbiome_vOTU17670	-0.1783	0.1363	0.1913	0.6266	623	143
BMI	low	b_high	CRCbiome_vOTU07437	-0.1368	0.1051	0.1935	0.6292	623	99
BMI	low	b_high	CRCbiome_vOTU06625	0.2058	0.1659	0.2153	0.6497	623	192
BMI	low	b_high	CRCbiome_vOTU18045	0.1429	0.1176	0.2247	0.6617	623	153
BMI	low	b_high	CRCbiome_vOTU06847	0.1648	0.1391	0.2366	0.6711	623	332
BMI	low	b_high	CRCbiome_vOTU14163	-0.1889	0.1598	0.2375	0.6711	623	219
BMI	low	b_high	CRCbiome_vOTU02333	0.1801	0.1542	0.2433	0.6752	623	151
BMI	low	b_high	CRCbiome_vOTU08771	-0.133	0.1159	0.2519	0.6844	623	90
BMI	low	b_high	CRCbiome_vOTU10637	-0.09169	0.08012	0.2529	0.6858	623	63
BMI	low	b_high	CRCbiome_vOTU16433	0.07936	0.07021	0.2588	0.6911	623	71
BMI	low	b_high	CRCbiome_vOTU08913	0.09397	0.08497	0.2692	0.7009	623	92
BMI	low	b_high	CRCbiome_vOTU11327	0.1528	0.1395	0.2736	0.7077	623	318
BMI	low	b_high	CRCbiome_vOTU11186	0.1034	0.09515	0.2774	0.7108	623	77
BMI	low	b_high	CRCbiome_vOTU07547	0.1927	0.1795	0.2834	0.7158	623	166
BMI	low	b_high	CRCbiome_vOTU10475	-0.1273	0.1178	0.2804	0.7158	623	112
BMI	low	b_high	CRCbiome_vOTU00409	0.1048	0.09949	0.2924	0.7242	623	100
BMI	low	b_high	CRCbiome_vOTU03303	-0.1107	0.1051	0.2926	0.7242	623	82
BMI	low	b_high	CRCbiome_vOTU16923	0.1194	0.1133	0.2923	0.7242	623	114
BMI	low	b_high	CRCbiome_vOTU07624	0.1386	0.1336	0.3	0.7355	623	328
BMI	low	b_high	CRCbiome_vOTU00912	0.1619	0.1584	0.3072	0.7457	623	228
BMI	low	b_high	CRCbiome_vOTU16360	-0.1407	0.1377	0.3075	0.7457	623	246
BMI	low	b_high	CRCbiome_vOTU00014	-0.1432	0.1437	0.3195	0.7549	623	462
BMI	low	b_high	CRCbiome_vOTU05051	-0.09936	0.1008	0.3247	0.761	623	87
BMI	low	b_high	CRCbiome_vOTU06460	0.07888	0.08007	0.3249	0.761	623	96
BMI	low	b_high	CRCbiome_vOTU15976	-0.1131	0.1153	0.3268	0.761	623	83
BMI	low	b_high	CRCbiome_vOTU18200	0.07344	0.07466	0.3257	0.761	623	64
BMI	low	b_high	CRCbiome_vOTU00680	-0.1003	0.1052	0.3406	0.774	623	95
BMI	low	b_high	CRCbiome_vOTU00279	0.07671	0.08102	0.3441	0.778	623	73
BMI	low	b_high	CRCbiome_vOTU04186	-0.08459	0.08953	0.3451	0.779	623	73
BMI	low	b_high	CRCbiome_vOTU14013	-0.08862	0.09512	0.3518	0.7831	623	142
BMI	low	b_high	CRCbiome_vOTU15035	0.1195	0.1286	0.3532	0.7831	623	318
BMI	low	b_high	CRCbiome_vOTU16623	0.07751	0.0834	0.3531	0.7831	623	95
BMI	low	b_high	CRCbiome_vOTU18008	-0.09522	0.1046	0.3631	0.7902	623	71
BMI	low	b_high	CRCbiome_vOTU09503	0.1321	0.1487	0.3749	0.7985	623	323
BMI	low	b_high	CRCbiome_vOTU14742	0.132	0.1535	0.3899	0.8039	623	202
BMI	low	b_high	CRCbiome_vOTU00160	0.05781	0.06937	0.405	0.8063	623	66
BMI	low	b_high	CRCbiome_vOTU16067	-0.05571	0.06675	0.4043	0.8063	623	63
BMI	low	b_high	CRCbiome_vOTU18323	0.09539	0.113	0.3988	0.8063	623	99
BMI	low	b_high	CRCbiome_vOTU01802	-0.07285	0.0883	0.4097	0.808	623	85
BMI	low	b_high	CRCbiome_vOTU09493	0.08501	0.1075	0.4294	0.8179	623	94
BMI	low	b_high	CRCbiome_vOTU12609	0.1468	0.1869	0.4323	0.8198	623	409
BMI	low	b_high	CRCbiome_vOTU14796	-0.1089	0.1388	0.4329	0.8198	623	462
BMI	low	b_high	CRCbiome_vOTU07045	0.07173	0.09401	0.4458	0.8305	623	92
BMI	low	b_high	CRCbiome_vOTU06250	-0.09343	0.1243	0.4526	0.8324	623	149
BMI	low	b_high	CRCbiome_vOTU05459	0.05074	0.06918	0.4636	0.8372	623	69
BMI	low	b_high	CRCbiome_vOTU12720	-0.06258	0.085319999999999993	0.4635	0.8372	623	70
BMI	low	b_high	CRCbiome_vOTU00071	0.08062	0.1113	0.4692	0.8386	623	78
BMI	low	b_high	CRCbiome_vOTU05728	-0.06321	0.09012	0.4833	0.8468	623	67
BMI	low	b_high	CRCbiome_vOTU06949	0.09723	0.1445	0.5011	0.8528	623	265
BMI	low	b_high	CRCbiome_vOTU16396	-0.06988	0.1046	0.5043	0.8565	623	78
BMI	low	b_high	CRCbiome_vOTU00335	-0.1114	0.1675	0.5064	0.8585	623	241
BMI	low	b_high	CRCbiome_vOTU06524	-0.08529	0.1294	0.5101	0.8615	623	130
BMI	low	b_high	CRCbiome_vOTU10907	-0.09381	0.1456	0.5195	0.8667	623	197
BMI	low	b_high	CRCbiome_vOTU13666	-0.08374	0.1307	0.5221	0.867	623	233
BMI	low	b_high	CRCbiome_vOTU06243	0.05364	0.08437	0.5252	0.8683	623	73
BMI	low	b_high	CRCbiome_vOTU07583	-0.09974	0.1604	0.5344	0.8735	623	414
BMI	low	b_high	CRCbiome_vOTU18455	-0.07128	0.1145	0.5338	0.8735	623	73
BMI	low	b_high	CRCbiome_vOTU06510	0.04301	0.0741	0.5618	0.8834	623	68
BMI	low	b_high	CRCbiome_vOTU08410	-0.03958	0.06889	0.5658	0.8834	623	64
BMI	low	b_high	CRCbiome_vOTU14802	0.05501	0.09281	0.5536	0.8834	623	104
BMI	low	b_high	CRCbiome_vOTU00386	-0.06636	0.1205	0.5822	0.884	623	85
BMI	low	b_high	CRCbiome_vOTU10713	0.05604	0.1027	0.5854	0.884	623	109
BMI	low	b_high	CRCbiome_vOTU14017	-0.06151	0.113	0.5863	0.884	623	106
BMI	low	b_high	CRCbiome_vOTU17495	-0.05394	0.09717	0.579	0.884	623	112
BMI	low	b_high	CRCbiome_vOTU17956	-0.04865	0.09201	0.5971	0.8873	623	72
BMI	low	b_high	CRCbiome_vOTU05594	-0.05114	0.09906	0.6059	0.8907	623	94
BMI	low	b_high	CRCbiome_vOTU05693	0.1026	0.1987	0.6059	0.8907	623	387
BMI	low	b_high	CRCbiome_vOTU06695	-0.05062	0.1009	0.616	0.8958	623	82
BMI	low	b_high	CRCbiome_vOTU00108	0.09078	0.1864	0.6265	0.902	623	432
BMI	low	b_high	CRCbiome_vOTU04840	-0.03396	0.07538	0.6525	0.9109	623	105
BMI	low	b_high	CRCbiome_vOTU08908	-0.03776	0.08407	0.6535	0.9109	623	72
BMI	low	b_high	CRCbiome_vOTU06147	-0.03542	0.0854	0.6785	0.9239	623	74
BMI	low	b_high	CRCbiome_vOTU18297	0.04146	0.1014	0.6827	0.9257	623	91
BMI	low	b_high	CRCbiome_vOTU00236	0.03273	0.08089	0.6858	0.9261	623	69
BMI	low	b_high	CRCbiome_vOTU01238	-0.04007	0.09933	0.6868	0.9261	623	86
BMI	low	b_high	CRCbiome_vOTU06277	-0.06926	0.1705	0.6847	0.9261	623	235
BMI	low	b_high	CRCbiome_vOTU12833	0.07313	0.1805	0.6855	0.9261	623	342
BMI	low	b_high	CRCbiome_vOTU17028	-0.05158	0.1297	0.6911	0.9264	623	167
BMI	low	b_high	CRCbiome_vOTU02714	0.04516	0.1178	0.7016	0.9266	623	103
BMI	low	b_high	CRCbiome_vOTU16764	-0.0452	0.1192	0.7046	0.9266	623	164
BMI	low	b_high	CRCbiome_vOTU00113	0.04905	0.1342	0.7148	0.9327	623	217
BMI	low	b_high	CRCbiome_vOTU06961	0.05528	0.1524	0.7169	0.9337	623	150
BMI	low	b_high	CRCbiome_vOTU06383	-0.0336	0.09417	0.7214	0.9337	623	101
BMI	low	b_high	CRCbiome_vOTU06261	-0.0366	0.105	0.7275	0.934	623	92
BMI	low	b_high	CRCbiome_vOTU16515	0.0214	0.07697	0.7811	0.9538	623	75
BMI	low	b_high	CRCbiome_vOTU06779	0.03873	0.1644	0.8138	0.9567	623	144
BMI	low	b_high	CRCbiome_vOTU06796	0.0221	0.09076	0.8077	0.9567	623	84
BMI	low	b_high	CRCbiome_vOTU11150	-0.02681	0.1113	0.8097	0.9567	623	98
BMI	low	b_high	CRCbiome_vOTU14720	-0.03061	0.1307	0.8149	0.9567	623	223
BMI	low	b_high	CRCbiome_vOTU18092	0.0283	0.107	0.7915	0.9567	623	75
BMI	low	b_high	CRCbiome_vOTU18478	0.0298	0.1243	0.8106	0.9567	623	309
BMI	low	b_high	CRCbiome_vOTU18494	-0.03001	0.1166	0.797	0.9567	623	137
BMI	low	b_high	CRCbiome_vOTU17445	-0.02779	0.1239	0.8226	0.9571	623	282
BMI	low	b_high	CRCbiome_vOTU00156	-0.02098	0.09682	0.8285	0.9601	623	64
BMI	low	b_high	CRCbiome_vOTU17901	-0.0153	0.1035	0.8826	0.9778	623	95
BMI	low	b_high	CRCbiome_vOTU06344	-0.01133	0.118	0.9235	0.9869	623	173
BMI	low	b_high	CRCbiome_vOTU18294	0.009895	0.1131	0.9303	0.9903	623	143
BMI	low	b_high	CRCbiome_vOTU15587	0.00486	0.13	0.9702	0.9962	623	171
MUFA (E%)	low	b_high	CRCbiome_vOTU01238	0.3362	0.09306	3.269e-4	0.1285	630	87
MUFA (E%)	low	b_high	CRCbiome_vOTU00236	0.2554	0.08244	0.00204	0.2248	630	78
MUFA (E%)	low	b_high	CRCbiome_vOTU16515	0.2902	0.09985	0.003781	0.2798	630	99
MUFA (E%)	low	b_high	CRCbiome_vOTU00108	0.4064	0.1855	0.02883	0.5431	630	436
MUFA (E%)	low	b_high	CRCbiome_vOTU03303	0.1927	0.09885	0.05175	0.6004	630	74
MUFA (E%)	low	b_high	CRCbiome_vOTU04840	0.1308	0.07046	0.06391	0.6004	630	101
MUFA (E%)	low	b_high	CRCbiome_vOTU06766	0.2479	0.1265	0.05043	0.6004	630	296
MUFA (E%)	low	b_high	CRCbiome_vOTU08314	-0.2832	0.1433	0.04863	0.6004	630	191
MUFA (E%)	low	b_high	CRCbiome_vOTU12833	0.3381	0.1766	0.05608	0.6004	630	334
MUFA (E%)	low	b_high	CRCbiome_vOTU04186	0.1645	0.09027	0.06893	0.604	630	79
MUFA (E%)	low	b_high	CRCbiome_vOTU14163	-0.2832	0.1562	0.07035	0.6098	630	237
MUFA (E%)	low	b_high	CRCbiome_vOTU14013	0.1807	0.1011	0.07447	0.6122	630	140
MUFA (E%)	low	b_high	CRCbiome_vOTU07167	0.1514	0.08634	0.08008	0.6179	630	75
MUFA (E%)	low	b_high	CRCbiome_vOTU16923	-0.1855	0.1062	0.08105	0.6179	630	102
MUFA (E%)	low	b_high	CRCbiome_vOTU04155	0.1754	0.1015	0.08454	0.6286	630	91
MUFA (E%)	low	b_high	CRCbiome_vOTU07583	0.2262	0.1339	0.0916	0.6508	630	417
MUFA (E%)	low	b_high	CRCbiome_vOTU06277	0.2477	0.1492	0.09734	0.6613	630	239
MUFA (E%)	low	b_high	CRCbiome_vOTU18341	0.1223	0.07368	0.09733	0.6613	630	72
MUFA (E%)	low	b_high	CRCbiome_vOTU18297	0.1669	0.102	0.1021	0.6666	630	99
MUFA (E%)	low	b_high	CRCbiome_vOTU00335	0.2332	0.1472	0.1137	0.6796	630	248
MUFA (E%)	low	b_high	CRCbiome_vOTU07624	0.2486	0.1569	0.1135	0.6796	630	358
MUFA (E%)	low	b_high	CRCbiome_vOTU18092	0.1622	0.1043	0.1205	0.6892	630	72
MUFA (E%)	low	b_high	CRCbiome_vOTU00102	-0.1793	0.1166	0.1245	0.6936	630	121
MUFA (E%)	low	b_high	CRCbiome_vOTU06206	0.1649	0.1114	0.1392	0.7109	630	117
MUFA (E%)	low	b_high	CRCbiome_vOTU00014	0.2055	0.1418	0.1477	0.7208	630	466
MUFA (E%)	low	b_high	CRCbiome_vOTU02714	-0.1684	0.1169	0.15	0.7231	630	93
MUFA (E%)	low	b_high	CRCbiome_vOTU17670	-0.2047	0.1419	0.1496	0.7231	630	140
MUFA (E%)	low	b_high	CRCbiome_vOTU11017	0.1915	0.1357	0.1586	0.7263	630	185
MUFA (E%)	low	b_high	CRCbiome_vOTU13928	0.178	0.1243	0.1529	0.7263	630	171
MUFA (E%)	low	b_high	CRCbiome_vOTU16433	0.1019	0.07224	0.1589	0.7263	630	65
MUFA (E%)	low	b_high	CRCbiome_vOTU06695	0.1345	0.09689	0.1657	0.7295	630	76
MUFA (E%)	low	b_high	CRCbiome_vOTU10907	0.2054	0.1474	0.1641	0.7295	630	207
MUFA (E%)	low	b_high	CRCbiome_vOTU18353	-0.2401	0.173	0.1658	0.7295	630	438
MUFA (E%)	low	b_high	CRCbiome_vOTU06383	-0.1384	0.1004	0.1685	0.7389	630	106
MUFA (E%)	low	b_high	CRCbiome_vOTU09395	0.09726	0.07236	0.1794	0.751	630	65
MUFA (E%)	low	b_high	CRCbiome_vOTU10475	0.1754	0.1314	0.1823	0.751	630	115
MUFA (E%)	low	b_high	CRCbiome_vOTU00063	-0.1502	0.1138	0.1871	0.754	630	119
MUFA (E%)	low	b_high	CRCbiome_vOTU00912	0.1852	0.1431	0.196	0.7595	630	236
MUFA (E%)	low	b_high	CRCbiome_vOTU05899	0.1683	0.1302	0.1968	0.7595	630	104
MUFA (E%)	low	b_high	CRCbiome_vOTU16292	0.1899	0.1466	0.1956	0.7595	630	369
MUFA (E%)	low	b_high	CRCbiome_vOTU06201	-0.1012	0.07956	0.2038	0.7629	630	67
MUFA (E%)	low	b_high	CRCbiome_vOTU16067	0.08413	0.06731	0.2118	0.778	630	74
MUFA (E%)	low	b_high	CRCbiome_vOTU00386	-0.1274	0.1025	0.2145	0.7833	630	76
MUFA (E%)	low	b_high	CRCbiome_vOTU14796	0.2014	0.1623	0.2151	0.7835	630	478
MUFA (E%)	low	b_high	CRCbiome_vOTU18323	-0.1444	0.1169	0.2171	0.7835	630	92
MUFA (E%)	low	b_high	CRCbiome_vOTU18494	0.1375	0.1114	0.2176	0.7841	630	126
MUFA (E%)	low	b_high	CRCbiome_vOTU11258	0.1602	0.1306	0.2204	0.7861	630	141
MUFA (E%)	low	b_high	CRCbiome_vOTU07549	0.09746	0.08123	0.2307	0.7883	630	80
MUFA (E%)	low	b_high	CRCbiome_vOTU10713	0.1222	0.1024	0.2335	0.7924	630	121
MUFA (E%)	low	b_high	CRCbiome_vOTU06779	0.1791	0.1507	0.2351	0.7932	630	165
MUFA (E%)	low	b_high	CRCbiome_vOTU06949	0.1623	0.1385	0.2416	0.7975	630	273
MUFA (E%)	low	b_high	CRCbiome_vOTU00012	0.1522	0.1318	0.2484	0.807	630	231
MUFA (E%)	low	b_high	CRCbiome_vOTU11150	0.1388	0.1262	0.2716	0.8205	630	102
MUFA (E%)	low	b_high	CRCbiome_vOTU15035	0.1396	0.1277	0.2749	0.8205	630	353
MUFA (E%)	low	b_high	CRCbiome_vOTU15587	0.1672	0.1483	0.2599	0.8205	630	174
MUFA (E%)	low	b_high	CRCbiome_vOTU17283	0.09755	0.09209	0.2899	0.8288	630	111
MUFA (E%)	low	b_high	CRCbiome_vOTU15976	0.1148	0.1109	0.3009	0.8316	630	87
MUFA (E%)	low	b_high	CRCbiome_vOTU03890	0.08259	0.08025	0.3038	0.8324	630	68
MUFA (E%)	low	b_high	CRCbiome_vOTU18008	0.10780000000000001	0.1055	0.3072	0.8338	630	72
MUFA (E%)	low	b_high	CRCbiome_vOTU00156	-0.0997	0.09869	0.3127	0.8376	630	65
MUFA (E%)	low	b_high	CRCbiome_vOTU17445	0.1383	0.1378	0.316	0.8376	630	293
MUFA (E%)	low	b_high	CRCbiome_vOTU17901	0.09991	0.1	0.3182	0.8376	630	100
MUFA (E%)	low	b_high	CRCbiome_vOTU05224	0.08579	0.08699	0.3244	0.8404	630	71
MUFA (E%)	low	b_high	CRCbiome_vOTU09838	0.1372	0.1394	0.3255	0.8404	630	452
MUFA (E%)	low	b_high	CRCbiome_vOTU00185	0.08407	0.0862	0.3298	0.8418	630	68
MUFA (E%)	low	b_high	CRCbiome_vOTU06193	0.1946	0.2032	0.3386	0.847	630	368
MUFA (E%)	low	b_high	CRCbiome_vOTU07544	0.1013	0.1048	0.3343	0.847	630	66
MUFA (E%)	low	b_high	CRCbiome_vOTU14802	0.09417	0.09821	0.338	0.847	630	112
MUFA (E%)	low	b_high	CRCbiome_vOTU00680	0.08608	0.0976	0.3781	0.8521	630	89
MUFA (E%)	low	b_high	CRCbiome_vOTU05594	0.09	0.09683	0.353	0.8521	630	89
MUFA (E%)	low	b_high	CRCbiome_vOTU06460	-0.08912	0.09557	0.3514	0.8521	630	99
MUFA (E%)	low	b_high	CRCbiome_vOTU13168	-0.1152	0.1221	0.3457	0.8521	630	119
MUFA (E%)	low	b_high	CRCbiome_vOTU14990	-0.101	0.1113	0.3648	0.8521	630	128
MUFA (E%)	low	b_high	CRCbiome_vOTU17028	0.1362	0.1491	0.3612	0.8521	630	167
MUFA (E%)	low	b_high	CRCbiome_vOTU18047	-0.06584	0.07481	0.3792	0.8521	630	71
MUFA (E%)	low	b_high	CRCbiome_vOTU18056	-0.11	0.1232	0.3725	0.8521	630	86
MUFA (E%)	low	b_high	CRCbiome_vOTU00113	0.1145	0.1309	0.3818	0.8532	630	226
MUFA (E%)	low	b_high	CRCbiome_vOTU04991	0.08028	0.09222	0.3843	0.8532	630	101
MUFA (E%)	low	b_high	CRCbiome_vOTU13666	0.1021	0.1198	0.3941	0.8552	630	243
MUFA (E%)	low	b_high	CRCbiome_vOTU14742	-0.1349	0.1574	0.3917	0.8552	630	200
MUFA (E%)	low	b_high	CRCbiome_vOTU06890	-0.109	0.1368	0.4258	0.8746	630	148
MUFA (E%)	low	b_high	CRCbiome_vOTU01802	-0.07218	0.09352	0.4405	0.8782	630	93
MUFA (E%)	low	b_high	CRCbiome_vOTU06625	-0.1232	0.1625	0.4487	0.8794	630	191
MUFA (E%)	low	b_high	CRCbiome_vOTU15475	0.0618	0.08147	0.4484	0.8794	630	70
MUFA (E%)	low	b_high	CRCbiome_vOTU07538	0.09787	0.1319	0.4585	0.885	630	102
MUFA (E%)	low	b_high	CRCbiome_vOTU05459	-0.0702	0.1	0.4831	0.8986	630	66
MUFA (E%)	low	b_high	CRCbiome_vOTU00307	0.075	0.1081	0.4882	0.8994	630	129
MUFA (E%)	low	b_high	CRCbiome_vOTU05693	0.1243	0.1854	0.5029	0.905	630	387
MUFA (E%)	low	b_high	CRCbiome_vOTU05990	0.07638	0.1143	0.5042	0.905	630	108
MUFA (E%)	low	b_high	CRCbiome_vOTU17423	-0.06577	0.09894	0.5064	0.9056	630	109
MUFA (E%)	low	b_high	CRCbiome_vOTU17495	0.07888	0.121	0.5146	0.9078	630	117
MUFA (E%)	low	b_high	CRCbiome_vOTU14017	0.068	0.1083	0.5303	0.9121	630	102
MUFA (E%)	low	b_high	CRCbiome_vOTU06847	0.08351	0.1385	0.5467	0.9163	630	341
MUFA (E%)	low	b_high	CRCbiome_vOTU11327	0.0747	0.1383	0.5893	0.9252	630	323
MUFA (E%)	low	b_high	CRCbiome_vOTU16396	0.04927	0.09284	0.5958	0.9303	630	76
MUFA (E%)	low	b_high	CRCbiome_vOTU17937	-0.04549	0.08566	0.5956	0.9303	630	65
MUFA (E%)	low	b_high	CRCbiome_vOTU00076	-0.08953	0.1716	0.602	0.9318	630	279
MUFA (E%)	low	b_high	CRCbiome_vOTU18478	0.0671	0.13	0.6059	0.9318	630	321
MUFA (E%)	low	b_high	CRCbiome_vOTU16764	-0.06109	0.1194	0.609	0.9339	630	170
MUFA (E%)	low	b_high	CRCbiome_vOTU12609	0.07953	0.1605	0.6205	0.9372	630	413
MUFA (E%)	low	b_high	CRCbiome_vOTU06261	-0.04035	0.08682	0.6423	0.9426	630	84
MUFA (E%)	low	b_high	CRCbiome_vOTU14044	0.06561	0.1391	0.6373	0.9426	630	161
MUFA (E%)	low	b_high	CRCbiome_vOTU18455	-0.0527	0.1119	0.6379	0.9426	630	87
MUFA (E%)	low	b_high	CRCbiome_vOTU00579	-0.05122	0.114	0.6532	0.9458	630	130
MUFA (E%)	low	b_high	CRCbiome_vOTU14720	0.05478	0.1271	0.6666	0.9533	630	234
MUFA (E%)	low	b_high	CRCbiome_vOTU00409	0.03512	0.08556	0.6816	0.9547	630	78
MUFA (E%)	low	b_high	CRCbiome_vOTU05728	0.0371	0.09005	0.6805	0.9547	630	73
MUFA (E%)	low	b_high	CRCbiome_vOTU06510	0.0288	0.07062	0.6836	0.9547	630	65
MUFA (E%)	low	b_high	CRCbiome_vOTU07352	0.05611	0.1506	0.7095	0.9565	630	234
MUFA (E%)	low	b_high	CRCbiome_vOTU07437	0.03848	0.1039	0.7111	0.9565	630	102
MUFA (E%)	low	b_high	CRCbiome_vOTU07146	-0.03015	0.08578	0.7254	0.9598	630	73
MUFA (E%)	low	b_high	CRCbiome_vOTU12720	-0.03298	0.0935	0.7244	0.9598	630	75
MUFA (E%)	low	b_high	CRCbiome_vOTU06250	0.03935	0.1227	0.7486	0.9683	630	156
MUFA (E%)	low	b_high	CRCbiome_vOTU06407	0.05031	0.1604	0.7538	0.9685	630	178
MUFA (E%)	low	b_high	CRCbiome_vOTU11186	0.02882	0.09284	0.7563	0.9685	630	72
MUFA (E%)	low	b_high	CRCbiome_vOTU05051	0.02968	0.09905	0.7646	0.9693	630	90
MUFA (E%)	low	b_high	CRCbiome_vOTU06147	0.0191	0.07155	0.7896	0.9738	630	67
MUFA (E%)	low	b_high	CRCbiome_vOTU14617	-0.0327	0.1219	0.7885	0.9738	630	132
MUFA (E%)	low	b_high	CRCbiome_vOTU14650	0.05478	0.1961	0.7801	0.9738	630	294
MUFA (E%)	low	b_high	CRCbiome_vOTU01854	0.03537	0.135	0.7934	0.9745	630	364
MUFA (E%)	low	b_high	CRCbiome_vOTU06961	0.0386	0.152	0.7996	0.9755	630	153
MUFA (E%)	low	b_high	CRCbiome_vOTU08908	-0.02104	0.08495	0.8044	0.9755	630	74
MUFA (E%)	low	b_high	CRCbiome_vOTU00495	-0.02099	0.09336	0.8222	0.9783	630	77
MUFA (E%)	low	b_high	CRCbiome_vOTU06524	-0.0269	0.118	0.8198	0.9783	630	122
MUFA (E%)	low	b_high	CRCbiome_vOTU08913	0.01995	0.08248	0.8089	0.9783	630	97
MUFA (E%)	low	b_high	CRCbiome_vOTU10262	-0.03494	0.1569	0.8238	0.9783	630	251
MUFA (E%)	low	b_high	CRCbiome_vOTU07045	-0.01742	0.08084	0.8294	0.979	630	92
MUFA (E%)	low	b_high	CRCbiome_vOTU00279	0.01687	0.08979	0.851	0.9791	630	81
MUFA (E%)	low	b_high	CRCbiome_vOTU00300	0.01801	0.1098	0.8697	0.9791	630	83
MUFA (E%)	low	b_high	CRCbiome_vOTU02986	-0.01512	0.0739	0.8379	0.9791	630	74
MUFA (E%)	low	b_high	CRCbiome_vOTU06476	-0.03037	0.1638	0.853	0.9791	630	109
MUFA (E%)	low	b_high	CRCbiome_vOTU17956	0.0187	0.1002	0.8521	0.9791	630	89
MUFA (E%)	low	b_high	CRCbiome_vOTU09914	-0.02891	0.1825	0.8742	0.9794	630	320
MUFA (E%)	low	b_high	CRCbiome_vOTU00071	0.01692	0.1124	0.8805	0.9825	630	79
MUFA (E%)	low	b_high	CRCbiome_vOTU16284	-0.01368	0.09695	0.8878	0.9825	630	119
MUFA (E%)	low	b_high	CRCbiome_vOTU16360	0.02009	0.1446	0.8895	0.9825	630	259
MUFA (E%)	low	b_high	CRCbiome_vOTU04326	0.01588	0.1203	0.895	0.983	630	92
MUFA (E%)	low	b_high	CRCbiome_vOTU06136	-0.01157	0.0865	0.8936	0.983	630	64
MUFA (E%)	low	b_high	CRCbiome_vOTU06344	0.01472	0.1153	0.8985	0.983	630	173
MUFA (E%)	low	b_high	CRCbiome_vOTU11521	-0.01026	0.07682	0.8938	0.983	630	68
MUFA (E%)	low	b_high	CRCbiome_vOTU18045	-0.01631	0.1401	0.9074	0.983	630	151
MUFA (E%)	low	b_high	CRCbiome_vOTU08262	-0.009676	0.09152	0.9158	0.9839	630	85
MUFA (E%)	low	b_high	CRCbiome_vOTU00018	-0.01703	0.1908	0.9289	0.9851	630	199
MUFA (E%)	low	b_high	CRCbiome_vOTU02333	-0.01326	0.1537	0.9313	0.9851	630	165
MUFA (E%)	low	b_high	CRCbiome_vOTU06365	0.01435	0.1527	0.9251	0.9851	630	536
MUFA (E%)	low	b_high	CRCbiome_vOTU16623	0.007453	0.07949	0.9253	0.9851	630	97
MUFA (E%)	low	b_high	CRCbiome_vOTU07547	-0.01351	0.175	0.9385	0.9854	630	162
MUFA (E%)	low	b_high	CRCbiome_vOTU18294	0.01063	0.1411	0.94	0.9854	630	151
MUFA (E%)	low	b_high	CRCbiome_vOTU00738	0.00756	0.1249	0.9518	0.9855	630	87
MUFA (E%)	low	b_high	CRCbiome_vOTU08771	-0.007276	0.1179	0.9508	0.9855	630	106
MUFA (E%)	low	b_high	CRCbiome_vOTU16948	-0.005493	0.1424	0.9692	0.9919	630	533
MUFA (E%)	low	b_high	CRCbiome_vOTU18200	0.002869	0.07589	0.9699	0.9919	630	66
MUFA (E%)	low	b_high	CRCbiome_vOTU02518	-0.005065	0.1554	0.974	0.9933	630	321
MUFA (E%)	low	b_high	CRCbiome_vOTU06796	0.002113	0.08994	0.9813	0.995	630	86
MUFA (E%)	low	b_high	CRCbiome_vOTU09503	0.002123	0.1455	0.9884	0.9969	630	342
MUFA (E%)	low	b_high	CRCbiome_vOTU09493	7.619e-4	0.09662	0.9937	0.9976	630	111
MUFA (E%)	low	b_high	CRCbiome_vOTU00160	1.072e-4	0.06462	0.9987	0.9987	630	66
PUFA (E%)	low	b_high	CRCbiome_vOTU16515	0.3031	0.09665	0.001794	0.248	630	93
PUFA (E%)	low	b_high	CRCbiome_vOTU09838	0.3977	0.1389	0.004338	0.3226	630	447
PUFA (E%)	low	b_high	CRCbiome_vOTU16923	-0.2478	0.09924	0.01279	0.393	630	109
PUFA (E%)	low	b_high	CRCbiome_vOTU06695	0.2287	0.09764	0.01947	0.4615	630	78
PUFA (E%)	low	b_high	CRCbiome_vOTU05224	0.1991	0.08736	0.02302	0.4706	630	76
PUFA (E%)	low	b_high	CRCbiome_vOTU14017	0.2484	0.109	0.02298	0.4706	630	105
PUFA (E%)	low	b_high	CRCbiome_vOTU00102	-0.2527	0.122	0.03867	0.5527	630	130
PUFA (E%)	low	b_high	CRCbiome_vOTU17495	0.2311	0.1196	0.05374	0.5744	630	108
PUFA (E%)	low	b_high	CRCbiome_vOTU17670	-0.2767	0.1499	0.06527	0.5994	630	147
PUFA (E%)	low	b_high	CRCbiome_vOTU06651	0.1584	0.08768	0.07126	0.6129	630	66
PUFA (E%)	low	b_high	CRCbiome_vOTU16433	0.1196	0.07047	0.09024	0.6155	630	65
PUFA (E%)	low	b_high	CRCbiome_vOTU12833	0.2941	0.1751	0.09354	0.6169	630	353
PUFA (E%)	low	b_high	CRCbiome_vOTU14742	-0.25	0.1498	0.09555	0.6169	630	212
PUFA (E%)	low	b_high	CRCbiome_vOTU17445	0.1911	0.1141	0.09456	0.6169	630	297
PUFA (E%)	low	b_high	CRCbiome_vOTU18494	0.1943	0.1161	0.09466	0.6169	630	117
PUFA (E%)	low	b_high	CRCbiome_vOTU01238	0.1518	0.09141	0.09735	0.6233	630	85
PUFA (E%)	low	b_high	CRCbiome_vOTU02119	0.1197	0.07578	0.1148	0.6434	630	66
PUFA (E%)	low	b_high	CRCbiome_vOTU08262	0.1137	0.07209	0.1153	0.6434	630	76
PUFA (E%)	low	b_high	CRCbiome_vOTU14163	-0.2453	0.1547	0.1134	0.6434	630	231
PUFA (E%)	low	b_high	CRCbiome_vOTU06277	0.2284	0.1464	0.1193	0.6445	630	244
PUFA (E%)	low	b_high	CRCbiome_vOTU05990	-0.1697	0.1094	0.1214	0.6462	630	103
PUFA (E%)	low	b_high	CRCbiome_vOTU02714	-0.1891	0.1248	0.1301	0.6561	630	104
PUFA (E%)	low	b_high	CRCbiome_vOTU06779	0.2446	0.1613	0.1299	0.6561	630	151
PUFA (E%)	low	b_high	CRCbiome_vOTU00335	0.2177	0.1439	0.131	0.6564	630	246
PUFA (E%)	low	b_high	CRCbiome_vOTU09395	0.1151	0.07651	0.133	0.6595	630	71
PUFA (E%)	low	b_high	CRCbiome_vOTU00108	0.2752	0.1843	0.136	0.663	630	427
PUFA (E%)	low	b_high	CRCbiome_vOTU00307	0.1492	0.09994	0.1361	0.663	630	127
PUFA (E%)	low	b_high	CRCbiome_vOTU15976	-0.1473	0.1033	0.1544	0.6764	630	79
PUFA (E%)	low	b_high	CRCbiome_vOTU02333	-0.2039	0.1441	0.1576	0.6789	630	157
PUFA (E%)	low	b_high	CRCbiome_vOTU06193	0.2878	0.2045	0.1598	0.6789	630	339
PUFA (E%)	low	b_high	CRCbiome_vOTU18092	0.1417	0.1009	0.1607	0.6789	630	72
PUFA (E%)	low	b_high	CRCbiome_vOTU06625	-0.2103	0.1562	0.1787	0.6902	630	192
PUFA (E%)	low	b_high	CRCbiome_vOTU07538	-0.1452	0.1077	0.1779	0.6902	630	93
PUFA (E%)	low	b_high	CRCbiome_vOTU10713	0.1367	0.1014	0.1782	0.6902	630	124
PUFA (E%)	low	b_high	CRCbiome_vOTU10262	-0.2082	0.1562	0.183	0.7005	630	252
PUFA (E%)	low	b_high	CRCbiome_vOTU12720	-0.1246	0.09462	0.1884	0.7062	630	73
PUFA (E%)	low	b_high	CRCbiome_vOTU06201	-0.1011	0.07924	0.2026	0.7206	630	66
PUFA (E%)	low	b_high	CRCbiome_vOTU11017	0.1569	0.1233	0.2039	0.7206	630	188
PUFA (E%)	low	b_high	CRCbiome_vOTU16396	0.1243	0.09814	0.2057	0.722	630	78
PUFA (E%)	low	b_high	CRCbiome_vOTU18323	-0.1566	0.1238	0.2065	0.722	630	103
PUFA (E%)	low	b_high	CRCbiome_vOTU06261	-0.1207	0.09682	0.2128	0.7245	630	97
PUFA (E%)	low	b_high	CRCbiome_vOTU00236	0.1111	0.09278	0.2317	0.7262	630	75
PUFA (E%)	low	b_high	CRCbiome_vOTU18353	-0.2089	0.1748	0.2323	0.7262	630	413
PUFA (E%)	low	b_high	CRCbiome_vOTU06206	0.1344	0.1142	0.2397	0.7313	630	118
PUFA (E%)	low	b_high	CRCbiome_vOTU18297	0.122	0.1047	0.2443	0.7353	630	95
PUFA (E%)	low	b_high	CRCbiome_vOTU05051	-0.08876	0.07754	0.2528	0.7441	630	90
PUFA (E%)	low	b_high	CRCbiome_vOTU05693	0.213	0.1908	0.2648	0.7444	630	392
PUFA (E%)	low	b_high	CRCbiome_vOTU14802	0.1052	0.09505	0.2689	0.745	630	109
PUFA (E%)	low	b_high	CRCbiome_vOTU16284	0.1055	0.09666	0.2756	0.7512	630	112
PUFA (E%)	low	b_high	CRCbiome_vOTU07547	-0.1811	0.1692	0.285	0.7563	630	165
PUFA (E%)	low	b_high	CRCbiome_vOTU06510	-0.06893	0.0682	0.3126	0.7691	630	66
PUFA (E%)	low	b_high	CRCbiome_vOTU00279	0.08066	0.08155	0.323	0.7797	630	71
PUFA (E%)	low	b_high	CRCbiome_vOTU00680	-0.09584	0.09667	0.3219	0.7797	630	92
PUFA (E%)	low	b_high	CRCbiome_vOTU05899	-0.121	0.1246	0.3317	0.7829	630	98
PUFA (E%)	low	b_high	CRCbiome_vOTU07146	0.08358	0.08665	0.3351	0.7829	630	67
PUFA (E%)	low	b_high	CRCbiome_vOTU16915	-0.1215	0.126	0.3356	0.7829	630	64
PUFA (E%)	low	b_high	CRCbiome_vOTU00300	0.1195	0.1251	0.3401	0.7839	630	74
PUFA (E%)	low	b_high	CRCbiome_vOTU06546	0.09172	0.09618	0.3407	0.7839	630	65
PUFA (E%)	low	b_high	CRCbiome_vOTU06961	0.1444	0.1532	0.3461	0.7839	630	154
PUFA (E%)	low	b_high	CRCbiome_vOTU11258	-0.1162	0.1267	0.3594	0.7911	630	137
PUFA (E%)	low	b_high	CRCbiome_vOTU08913	0.07118	0.07793	0.3614	0.7941	630	87
PUFA (E%)	low	b_high	CRCbiome_vOTU10475	0.1191	0.1315	0.3651	0.7971	630	114
PUFA (E%)	low	b_high	CRCbiome_vOTU15035	0.1147	0.1265	0.365	0.7971	630	336
PUFA (E%)	low	b_high	CRCbiome_vOTU04186	0.08655	0.09613	0.3683	0.7979	630	83
PUFA (E%)	low	b_high	CRCbiome_vOTU08314	-0.1061	0.1176	0.3673	0.7979	630	182
PUFA (E%)	low	b_high	CRCbiome_vOTU08771	-0.1008	0.1155	0.3829	0.8039	630	99
PUFA (E%)	low	b_high	CRCbiome_vOTU11521	0.06398	0.07353	0.3846	0.8042	630	70
PUFA (E%)	low	b_high	CRCbiome_vOTU07437	-0.08243	0.09682	0.3949	0.8077	630	101
PUFA (E%)	low	b_high	CRCbiome_vOTU16292	0.1223	0.1439	0.3958	0.8083	630	387
PUFA (E%)	low	b_high	CRCbiome_vOTU13168	-0.1031	0.1226	0.4006	0.8093	630	125
PUFA (E%)	low	b_high	CRCbiome_vOTU06476	-0.1339	0.1621	0.409	0.8093	630	114
PUFA (E%)	low	b_high	CRCbiome_vOTU00014	0.1128	0.137	0.4107	0.8104	630	462
PUFA (E%)	low	b_high	CRCbiome_vOTU18045	-0.1106	0.1374	0.4215	0.8134	630	148
PUFA (E%)	low	b_high	CRCbiome_vOTU06147	-0.06768	0.08555	0.4292	0.8219	630	75
PUFA (E%)	low	b_high	CRCbiome_vOTU00156	-0.07439	0.09431	0.4305	0.8222	630	64
PUFA (E%)	low	b_high	CRCbiome_vOTU13928	0.09816	0.1255	0.4345	0.8257	630	178
PUFA (E%)	low	b_high	CRCbiome_vOTU17423	-0.07275	0.09535	0.4457	0.8337	630	102
PUFA (E%)	low	b_high	CRCbiome_vOTU04991	0.06791	0.09019	0.4518	0.8351	630	98
PUFA (E%)	low	b_high	CRCbiome_vOTU00063	-0.08575	0.1173	0.4652	0.8427	630	128
PUFA (E%)	low	b_high	CRCbiome_vOTU00076	0.1258	0.1704	0.4606	0.8427	630	277
PUFA (E%)	low	b_high	CRCbiome_vOTU14796	0.1199	0.1628	0.4616	0.8427	630	471
PUFA (E%)	low	b_high	CRCbiome_vOTU15587	0.1087	0.1473	0.4608	0.8427	630	176
PUFA (E%)	low	b_high	CRCbiome_vOTU09195	0.0552	0.07711	0.4743	0.8449	630	66
PUFA (E%)	low	b_high	CRCbiome_vOTU05459	-0.06824	0.09744	0.484	0.8472	630	64
PUFA (E%)	low	b_high	CRCbiome_vOTU17283	-0.06114	0.08767	0.4858	0.8483	630	98
PUFA (E%)	low	b_high	CRCbiome_vOTU07352	0.093	0.1382	0.5011	0.8573	630	225
PUFA (E%)	low	b_high	CRCbiome_vOTU11150	0.08021	0.1188	0.4997	0.8573	630	97
PUFA (E%)	low	b_high	CRCbiome_vOTU12609	0.1039	0.1601	0.5168	0.8627	630	417
PUFA (E%)	low	b_high	CRCbiome_vOTU00912	0.09717	0.1504	0.5185	0.8642	630	231
PUFA (E%)	low	b_high	CRCbiome_vOTU00409	0.05753	0.09143	0.5295	0.8694	630	86
PUFA (E%)	low	b_high	CRCbiome_vOTU11186	-0.05784	0.09081	0.5244	0.8694	630	66
PUFA (E%)	low	b_high	CRCbiome_vOTU06383	-0.06214	0.1008	0.5378	0.8741	630	106
PUFA (E%)	low	b_high	CRCbiome_vOTU06243	0.06697	0.1139	0.5569	0.8809	630	75
PUFA (E%)	low	b_high	CRCbiome_vOTU07549	0.0482	0.08344	0.5637	0.8809	630	79
PUFA (E%)	low	b_high	CRCbiome_vOTU07583	0.09122	0.158	0.5639	0.8809	630	407
PUFA (E%)	low	b_high	CRCbiome_vOTU13666	0.07446	0.1264	0.5562	0.8809	630	235
PUFA (E%)	low	b_high	CRCbiome_vOTU18008	0.06111	0.1064	0.566	0.8809	630	81
PUFA (E%)	low	b_high	CRCbiome_vOTU14990	0.06391	0.115	0.5787	0.8824	630	130
PUFA (E%)	low	b_high	CRCbiome_vOTU18455	-0.06168	0.1102	0.5759	0.8824	630	77
PUFA (E%)	low	b_high	CRCbiome_vOTU06890	0.0774	0.1404	0.5817	0.8845	630	150
PUFA (E%)	low	b_high	CRCbiome_vOTU17028	0.07998	0.1479	0.5888	0.8871	630	172
PUFA (E%)	low	b_high	CRCbiome_vOTU00579	-0.06299	0.1191	0.597	0.8902	630	136
PUFA (E%)	low	b_high	CRCbiome_vOTU07167	-0.04351	0.08387	0.6041	0.8928	630	66
PUFA (E%)	low	b_high	CRCbiome_vOTU16623	0.03921	0.07554	0.6039	0.8928	630	91
PUFA (E%)	low	b_high	CRCbiome_vOTU06407	-0.07846	0.1563	0.6158	0.8973	630	168
PUFA (E%)	low	b_high	CRCbiome_vOTU00386	-0.04997	0.1016	0.6231	0.9	630	78
PUFA (E%)	low	b_high	CRCbiome_vOTU16948	0.06698	0.1418	0.6369	0.9044	630	528
PUFA (E%)	low	b_high	CRCbiome_vOTU18478	0.06002	0.1288	0.6413	0.9044	630	312
PUFA (E%)	low	b_high	CRCbiome_vOTU07045	0.04215	0.09248	0.6487	0.9066	630	92
PUFA (E%)	low	b_high	CRCbiome_vOTU06365	0.067780000000000007	0.152	0.6558	0.9074	630	531
PUFA (E%)	low	b_high	CRCbiome_vOTU06949	0.05822	0.137	0.671	0.9167	630	272
PUFA (E%)	low	b_high	CRCbiome_vOTU09493	0.04386	0.1097	0.6894	0.9211	630	111
PUFA (E%)	low	b_high	CRCbiome_vOTU13264	0.03868	0.09909	0.6964	0.9214	630	65
PUFA (E%)	low	b_high	CRCbiome_vOTU00018	0.07053	0.1816	0.6979	0.9219	630	182
PUFA (E%)	low	b_high	CRCbiome_vOTU00113	0.05105	0.1337	0.7027	0.9221	630	217
PUFA (E%)	low	b_high	CRCbiome_vOTU04155	0.03566	0.09609	0.7107	0.9274	630	92
PUFA (E%)	low	b_high	CRCbiome_vOTU10907	0.05182	0.1399	0.7111	0.9274	630	195
PUFA (E%)	low	b_high	CRCbiome_vOTU17956	0.03611	0.1005	0.7195	0.9301	630	89
PUFA (E%)	low	b_high	CRCbiome_vOTU05594	-0.03292	0.09358	0.7251	0.9323	630	84
PUFA (E%)	low	b_high	CRCbiome_vOTU06847	0.04838	0.1367	0.7236	0.9323	630	339
PUFA (E%)	low	b_high	CRCbiome_vOTU00012	0.04237	0.1315	0.7474	0.9389	630	220
PUFA (E%)	low	b_high	CRCbiome_vOTU03303	0.03197	0.09937	0.7477	0.9389	630	72
PUFA (E%)	low	b_high	CRCbiome_vOTU04840	0.02422	0.07463	0.7456	0.9389	630	99
PUFA (E%)	low	b_high	CRCbiome_vOTU06796	0.02789	0.08523	0.7436	0.9389	630	80
PUFA (E%)	low	b_high	CRCbiome_vOTU16360	0.04703	0.1414	0.7396	0.9389	630	246
PUFA (E%)	low	b_high	CRCbiome_vOTU07624	0.04122	0.1302	0.7517	0.9403	630	360
PUFA (E%)	low	b_high	CRCbiome_vOTU14720	0.03805	0.1269	0.7643	0.9462	630	221
PUFA (E%)	low	b_high	CRCbiome_vOTU14650	0.05641	0.1932	0.7704	0.9501	630	276
PUFA (E%)	low	b_high	CRCbiome_vOTU08025	0.03173	0.1097	0.7725	0.9508	630	69
PUFA (E%)	low	b_high	CRCbiome_vOTU06344	0.03171	0.1117	0.7767	0.9523	630	171
PUFA (E%)	low	b_high	CRCbiome_vOTU00738	0.03305	0.1216	0.7858	0.9544	630	82
PUFA (E%)	low	b_high	CRCbiome_vOTU06136	-0.02271	0.08577	0.7913	0.9571	630	64
PUFA (E%)	low	b_high	CRCbiome_vOTU01854	0.03769	0.1476	0.7986	0.9606	630	360
PUFA (E%)	low	b_high	CRCbiome_vOTU01802	-0.02393	0.09567	0.8025	0.9621	630	94
PUFA (E%)	low	b_high	CRCbiome_vOTU17901	0.02598	0.1038	0.8024	0.9621	630	97
PUFA (E%)	low	b_high	CRCbiome_vOTU06524	-0.0275	0.1189	0.8172	0.9657	630	123
PUFA (E%)	low	b_high	CRCbiome_vOTU14044	-0.03165	0.1437	0.8257	0.9685	630	146
PUFA (E%)	low	b_high	CRCbiome_vOTU00495	-0.01995	0.09754	0.838	0.9708	630	81
PUFA (E%)	low	b_high	CRCbiome_vOTU00071	0.02198	0.1098	0.8414	0.9714	630	73
PUFA (E%)	low	b_high	CRCbiome_vOTU05728	0.01784	0.09066	0.8441	0.9714	630	71
PUFA (E%)	low	b_high	CRCbiome_vOTU04326	-0.02274	0.1173	0.8463	0.972	630	86
PUFA (E%)	low	b_high	CRCbiome_vOTU09503	-0.02265	0.1472	0.8777	0.9798	630	324
PUFA (E%)	low	b_high	CRCbiome_vOTU11327	0.02054	0.1367	0.8806	0.981	630	322
PUFA (E%)	low	b_high	CRCbiome_vOTU18341	0.01069	0.07144	0.8811	0.9811	630	67
PUFA (E%)	low	b_high	CRCbiome_vOTU06250	0.01729	0.1191	0.8846	0.9817	630	158
PUFA (E%)	low	b_high	CRCbiome_vOTU18294	-0.01666	0.1342	0.9013	0.9842	630	136
PUFA (E%)	low	b_high	CRCbiome_vOTU09914	-0.0198	0.178	0.9114	0.9852	630	298
PUFA (E%)	low	b_high	CRCbiome_vOTU02518	0.0167	0.1541	0.9137	0.9859	630	331
PUFA (E%)	low	b_high	CRCbiome_vOTU06766	0.01067	0.1121	0.9242	0.986	630	295
PUFA (E%)	low	b_high	CRCbiome_vOTU16764	-0.01171	0.1164	0.9199	0.986	630	160
PUFA (E%)	low	b_high	CRCbiome_vOTU18056	-0.01176	0.1121	0.9165	0.986	630	73
PUFA (E%)	low	b_high	CRCbiome_vOTU08908	0.004403	0.0842	0.9583	0.98740000000000006	630	73
PUFA (E%)	low	b_high	CRCbiome_vOTU14013	0.005644	0.1005	0.9552	0.98740000000000006	630	139
PUFA (E%)	low	b_high	CRCbiome_vOTU14617	0.007053	0.1198	0.9531	0.98740000000000006	630	125
PUFA (E%)	low	b_high	CRCbiome_vOTU02986	-0.003069	0.07321	0.9666	0.9898	630	70
PUFA (E%)	low	b_high	CRCbiome_vOTU06460	-0.001425	0.09092	0.9875	0.9931	630	89
Energy (kcal/day)	low	b_high	CRCbiome_vOTU05693	0.8225	0.2044	6.434e-5	0.07431	630	406
Energy (kcal/day)	low	b_high	CRCbiome_vOTU12609	0.6767	0.1924	4.667e-4	0.1198	630	430
Energy (kcal/day)	low	b_high	CRCbiome_vOTU14742	-0.56	0.1657	7.696e-4	0.1482	630	202
Energy (kcal/day)	low	b_high	CRCbiome_vOTU16923	-0.3445	0.1105	0.001901	0.2553	630	115
Energy (kcal/day)	low	b_high	CRCbiome_vOTU00102	-0.3341	0.131	0.01102	0.3978	630	132
Energy (kcal/day)	low	b_high	CRCbiome_vOTU16292	0.361	0.1467	0.01418	0.4608	630	374
Energy (kcal/day)	low	b_high	CRCbiome_vOTU00113	0.3252	0.1473	0.02758	0.5369	630	234
Energy (kcal/day)	low	b_high	CRCbiome_vOTU00236	0.1911	0.1022	0.06199	0.5369	630	81
Energy (kcal/day)	low	b_high	CRCbiome_vOTU00680	-0.2322	0.1036	0.02531	0.5369	630	88
Energy (kcal/day)	low	b_high	CRCbiome_vOTU01802	0.1835	0.09618	0.05683	0.5369	630	83
Energy (kcal/day)	low	b_high	CRCbiome_vOTU02518	0.3211	0.1646	0.05149	0.5369	630	316
Energy (kcal/day)	low	b_high	CRCbiome_vOTU02714	-0.2494	0.1243	0.04525	0.5369	630	101
Energy (kcal/day)	low	b_high	CRCbiome_vOTU06695	0.2125	0.1092	0.05212	0.5369	630	84
Energy (kcal/day)	low	b_high	CRCbiome_vOTU08025	0.1485	0.0737	0.04435	0.5369	630	67
Energy (kcal/day)	low	b_high	CRCbiome_vOTU08314	-0.3077	0.1498	0.0404	0.5369	630	176
Energy (kcal/day)	low	b_high	CRCbiome_vOTU10713	0.2439	0.1138	0.0324	0.5369	630	136
Energy (kcal/day)	low	b_high	CRCbiome_vOTU11186	-0.1918	0.09468	0.04325	0.5369	630	72
Energy (kcal/day)	low	b_high	CRCbiome_vOTU13666	0.2785	0.1318	0.03503	0.5369	630	244
Energy (kcal/day)	low	b_high	CRCbiome_vOTU13928	0.2966	0.137	0.03074	0.5369	630	181
Energy (kcal/day)	low	b_high	CRCbiome_vOTU14017	0.2299	0.1196	0.05509	0.5369	630	112
Energy (kcal/day)	low	b_high	CRCbiome_vOTU14163	-0.3207	0.1693	0.05866	0.5369	630	223
Energy (kcal/day)	low	b_high	CRCbiome_vOTU14802	0.1832	0.09461	0.05329	0.5369	630	109
Energy (kcal/day)	low	b_high	CRCbiome_vOTU16515	0.2433	0.1094	0.02654	0.5369	630	99
Energy (kcal/day)	low	b_high	CRCbiome_vOTU17445	0.3383	0.1501	0.02461	0.5369	630	307
Energy (kcal/day)	low	b_high	CRCbiome_vOTU17901	-0.2212	0.1102	0.04519	0.5369	630	102
Energy (kcal/day)	low	b_high	CRCbiome_vOTU18047	0.1559	0.08256	0.05938	0.5369	630	68
Energy (kcal/day)	low	b_high	CRCbiome_vOTU18323	-0.2221	0.1186	0.06147	0.5369	630	96
Energy (kcal/day)	low	b_high	CRCbiome_vOTU18478	0.2797	0.1432	0.0512	0.5369	630	327
Energy (kcal/day)	low	b_high	CRCbiome_vOTU00300	0.2084	0.1157	0.07214	0.5847	630	77
Energy (kcal/day)	low	b_high	CRCbiome_vOTU07624	0.2897	0.1677	0.0845	0.6102	630	354
Energy (kcal/day)	low	b_high	CRCbiome_vOTU10475	0.2408	0.1406	0.08726	0.6106	630	109
Energy (kcal/day)	low	b_high	CRCbiome_vOTU11017	0.2384	0.1444	0.09923	0.6315	630	186
Energy (kcal/day)	low	b_high	CRCbiome_vOTU08771	-0.1978	0.1263	0.1178	0.6661	630	100
Energy (kcal/day)	low	b_high	CRCbiome_vOTU17495	0.1462	0.09593	0.1279	0.673	630	116
Energy (kcal/day)	low	b_high	CRCbiome_vOTU06243	0.1428	0.09412	0.1297	0.6753	630	84
Energy (kcal/day)	low	b_high	CRCbiome_vOTU18008	-0.1545	0.1031	0.1346	0.6846	630	68
Energy (kcal/day)	low	b_high	CRCbiome_vOTU18494	0.1827	0.1226	0.1369	0.6846	630	129
Energy (kcal/day)	low	b_high	CRCbiome_vOTU06206	0.1858	0.1251	0.1381	0.6862	630	118
Energy (kcal/day)	low	b_high	CRCbiome_vOTU09914	0.279	0.1942	0.1512	0.6999	630	307
Energy (kcal/day)	low	b_high	CRCbiome_vOTU14990	-0.171	0.119	0.1511	0.6999	630	130
Energy (kcal/day)	low	b_high	CRCbiome_vOTU18297	-0.1577	0.1103	0.1533	0.6999	630	94
Energy (kcal/day)	low	b_high	CRCbiome_vOTU00076	0.2629	0.1879	0.1623	0.7053	630	274
Energy (kcal/day)	low	b_high	CRCbiome_vOTU00495	0.1414	0.0998	0.157	0.7053	630	80
Energy (kcal/day)	low	b_high	CRCbiome_vOTU05224	0.1309	0.09313	0.1602	0.7053	630	75
Energy (kcal/day)	low	b_high	CRCbiome_vOTU06796	0.1293	0.09158	0.1585	0.7053	630	85
Energy (kcal/day)	low	b_high	CRCbiome_vOTU06476	-0.1834	0.1382	0.1849	0.7093	630	109
Energy (kcal/day)	low	b_high	CRCbiome_vOTU06460	0.1326	0.1008	0.1889	0.716	630	92
Energy (kcal/day)	low	b_high	CRCbiome_vOTU17670	-0.1802	0.1375	0.1904	0.7175	630	140
Energy (kcal/day)	low	b_high	CRCbiome_vOTU08908	0.127	0.09717	0.1918	0.7206	630	81
Energy (kcal/day)	low	b_high	CRCbiome_vOTU06961	-0.2003	0.1612	0.2146	0.7476	630	145
Energy (kcal/day)	low	b_high	CRCbiome_vOTU06625	-0.2095	0.1717	0.2229	0.7593	630	183
Energy (kcal/day)	low	b_high	CRCbiome_vOTU00018	0.2469	0.2065	0.2322	0.7599	630	203
Energy (kcal/day)	low	b_high	CRCbiome_vOTU00185	0.1007	0.08335	0.2275	0.7599	630	65
Energy (kcal/day)	low	b_high	CRCbiome_vOTU00279	0.1104	0.092	0.2307	0.7599	630	81
Energy (kcal/day)	low	b_high	CRCbiome_vOTU01854	0.1658	0.1368	0.2257	0.7599	630	363
Energy (kcal/day)	low	b_high	CRCbiome_vOTU06890	-0.1652	0.1359	0.2247	0.7599	630	135
Energy (kcal/day)	low	b_high	CRCbiome_vOTU14044	-0.2006	0.1689	0.2354	0.7599	630	170
Energy (kcal/day)	low	b_high	CRCbiome_vOTU14013	0.1212	0.103	0.2397	0.7606	630	142
Energy (kcal/day)	low	b_high	CRCbiome_vOTU07045	0.09822	0.08445	0.2452	0.7625	630	88
Energy (kcal/day)	low	b_high	CRCbiome_vOTU00307	0.1303	0.1143	0.2548	0.7723	630	127
Energy (kcal/day)	low	b_high	CRCbiome_vOTU09503	-0.1701	0.1524	0.2648	0.7752	630	337
Energy (kcal/day)	low	b_high	CRCbiome_vOTU14650	-0.2318	0.2105	0.2712	0.7769	630	282
Energy (kcal/day)	low	b_high	CRCbiome_vOTU14617	-0.1388	0.1297	0.2851	0.7907	630	131
Energy (kcal/day)	low	b_high	CRCbiome_vOTU16623	0.09378	0.08864	0.2905	0.7948	630	98
Energy (kcal/day)	low	b_high	CRCbiome_vOTU00409	0.09491	0.09125	0.2987	0.7978	630	90
Energy (kcal/day)	low	b_high	CRCbiome_vOTU00912	-0.163	0.158	0.3025	0.8005	630	237
Energy (kcal/day)	low	b_high	CRCbiome_vOTU16360	0.1511	0.1466	0.3029	0.8007	630	258
Energy (kcal/day)	low	b_high	CRCbiome_vOTU06250	0.1321	0.1327	0.3201	0.8126	630	156
Energy (kcal/day)	low	b_high	CRCbiome_vOTU06847	-0.1468	0.15	0.3283	0.8134	630	341
Energy (kcal/day)	low	b_high	CRCbiome_vOTU06407	-0.1768	0.1821	0.3322	0.8183	630	191
Energy (kcal/day)	low	b_high	CRCbiome_vOTU16948	0.1463	0.1527	0.3384	0.8247	630	524
Energy (kcal/day)	low	b_high	CRCbiome_vOTU14720	0.1334	0.1398	0.3403	0.8276	630	232
Energy (kcal/day)	low	b_high	CRCbiome_vOTU06193	-0.2071	0.221	0.3491	0.8375	630	348
Energy (kcal/day)	low	b_high	CRCbiome_vOTU04155	-0.08269	0.09107	0.3642	0.8461	630	87
Energy (kcal/day)	low	b_high	CRCbiome_vOTU10262	-0.153	0.1705	0.3699	0.8494	630	256
Energy (kcal/day)	low	b_high	CRCbiome_vOTU04186	-0.08893	0.09992	0.3738	0.8504	630	80
Energy (kcal/day)	low	b_high	CRCbiome_vOTU07352	-0.1423	0.1592	0.3718	0.8504	630	229
Energy (kcal/day)	low	b_high	CRCbiome_vOTU00579	0.1043	0.1205	0.3871	0.8633	630	129
Energy (kcal/day)	low	b_high	CRCbiome_vOTU03303	0.0919	0.1075	0.3929	0.8637	630	78
Energy (kcal/day)	low	b_high	CRCbiome_vOTU08262	0.08366	0.1025	0.4146	0.868	630	86
Energy (kcal/day)	low	b_high	CRCbiome_vOTU11150	0.1112	0.1362	0.4148	0.868	630	102
Energy (kcal/day)	low	b_high	CRCbiome_vOTU01238	0.08384	0.1081	0.4382	0.8744	630	90
Energy (kcal/day)	low	b_high	CRCbiome_vOTU06779	-0.1408	0.178	0.4294	0.8744	630	158
Energy (kcal/day)	low	b_high	CRCbiome_vOTU08913	0.06756	0.08811	0.4435	0.8744	630	90
Energy (kcal/day)	low	b_high	CRCbiome_vOTU15035	0.106	0.1384	0.4438	0.8744	630	344
Energy (kcal/day)	low	b_high	CRCbiome_vOTU13168	0.09622	0.1267	0.4478	0.8765	630	109
Energy (kcal/day)	low	b_high	CRCbiome_vOTU07538	-0.09967	0.1322	0.4511	0.8791	630	92
Energy (kcal/day)	low	b_high	CRCbiome_vOTU11327	-0.1112	0.1502	0.4596	0.88	630	329
Energy (kcal/day)	low	b_high	CRCbiome_vOTU18341	-0.05837	0.07968	0.4641	0.8808	630	69
Energy (kcal/day)	low	b_high	CRCbiome_vOTU00738	0.05736	0.07923	0.4694	0.8834	630	87
Energy (kcal/day)	low	b_high	CRCbiome_vOTU06147	-0.06591	0.09217	0.4748	0.8874	630	84
Energy (kcal/day)	low	b_high	CRCbiome_vOTU18455	-0.08989	0.1264	0.4772	0.8882	630	81
Energy (kcal/day)	low	b_high	CRCbiome_vOTU18037	-0.06343	0.09222	0.4919	0.8945	630	64
Energy (kcal/day)	low	b_high	CRCbiome_vOTU06261	-0.07827	0.1151	0.4968	0.8966	630	107
Energy (kcal/day)	low	b_high	CRCbiome_vOTU09801	0.05367	0.08239	0.5151	0.905	630	71
Energy (kcal/day)	low	b_high	CRCbiome_vOTU04840	-0.05059	0.07855	0.5198	0.9071	630	107
Energy (kcal/day)	low	b_high	CRCbiome_vOTU06510	-0.05351	0.0835	0.5219	0.9071	630	74
Energy (kcal/day)	low	b_high	CRCbiome_vOTU07547	-0.1177	0.1857	0.5265	0.9072	630	159
Energy (kcal/day)	low	b_high	CRCbiome_vOTU06365	0.1021	0.1642	0.5344	0.9082	630	526
Energy (kcal/day)	low	b_high	CRCbiome_vOTU11362	-0.05097	0.08184	0.5336	0.9082	630	70
Energy (kcal/day)	low	b_high	CRCbiome_vOTU05594	0.0582	0.09467	0.5389	0.9097	630	80
Energy (kcal/day)	low	b_high	CRCbiome_vOTU09493	0.06669	0.1133	0.5563	0.9154	630	106
Energy (kcal/day)	low	b_high	CRCbiome_vOTU10907	0.09528	0.1636	0.5604	0.9154	630	217
Energy (kcal/day)	low	b_high	CRCbiome_vOTU00335	-0.09687	0.175	0.5801	0.9184	630	259
Energy (kcal/day)	low	b_high	CRCbiome_vOTU05899	-0.07258	0.131	0.5797	0.9184	630	91
Energy (kcal/day)	low	b_high	CRCbiome_vOTU00386	0.06534	0.1228	0.595	0.9218	630	81
Energy (kcal/day)	low	b_high	CRCbiome_vOTU04991	0.03693	0.07427	0.6192	0.9316	630	106
Energy (kcal/day)	low	b_high	CRCbiome_vOTU05990	-0.05937	0.1196	0.6197	0.9316	630	102
Energy (kcal/day)	low	b_high	CRCbiome_vOTU00071	0.06084	0.1247	0.6257	0.9343	630	85
Energy (kcal/day)	low	b_high	CRCbiome_vOTU16396	-0.04843	0.09921	0.6256	0.9343	630	73
Energy (kcal/day)	low	b_high	CRCbiome_vOTU18200	-0.03976	0.08306	0.6323	0.9358	630	70
Energy (kcal/day)	low	b_high	CRCbiome_vOTU06766	-0.05677	0.1357	0.6759	0.948	630	294
Energy (kcal/day)	low	b_high	CRCbiome_vOTU16433	0.03177	0.0821	0.6989	0.9528	630	80
Energy (kcal/day)	low	b_high	CRCbiome_vOTU00012	0.05221	0.1402	0.7098	0.9549	630	227
Energy (kcal/day)	low	b_high	CRCbiome_vOTU11258	-0.04968	0.1341	0.7112	0.9562	630	128
Energy (kcal/day)	low	b_high	CRCbiome_vOTU09395	0.02206	0.06552	0.7364	0.9614	630	64
Energy (kcal/day)	low	b_high	CRCbiome_vOTU05728	-0.03043	0.0983	0.757	0.9614	630	75
Energy (kcal/day)	low	b_high	CRCbiome_vOTU00108	0.04507	0.2005	0.8222	0.9623	630	427
Energy (kcal/day)	low	b_high	CRCbiome_vOTU02333	0.04489	0.1615	0.7811	0.9623	630	148
Energy (kcal/day)	low	b_high	CRCbiome_vOTU03890	0.02294	0.08588	0.7895	0.9623	630	65
Energy (kcal/day)	low	b_high	CRCbiome_vOTU05051	-0.02348	0.1047	0.8227	0.9623	630	88
Energy (kcal/day)	low	b_high	CRCbiome_vOTU06277	0.05298	0.1795	0.768	0.9623	630	251
Energy (kcal/day)	low	b_high	CRCbiome_vOTU06949	0.03495	0.1505	0.8165	0.9623	630	265
Energy (kcal/day)	low	b_high	CRCbiome_vOTU07167	0.0204	0.09253	0.8256	0.9623	630	76
Energy (kcal/day)	low	b_high	CRCbiome_vOTU07437	0.03241	0.1075	0.7631	0.9623	630	95
Energy (kcal/day)	low	b_high	CRCbiome_vOTU07549	0.02396	0.08659	0.7821	0.9623	630	73
Energy (kcal/day)	low	b_high	CRCbiome_vOTU16284	0.02146	0.101	0.8319	0.9623	630	108
Energy (kcal/day)	low	b_high	CRCbiome_vOTU16764	-0.02988	0.1265	0.8133	0.9623	630	165
Energy (kcal/day)	low	b_high	CRCbiome_vOTU17283	0.02379	0.1001	0.8123	0.9623	630	108
Energy (kcal/day)	low	b_high	CRCbiome_vOTU17423	0.02893	0.1122	0.7967	0.9623	630	103
Energy (kcal/day)	low	b_high	CRCbiome_vOTU18045	-0.03578	0.1547	0.8172	0.9623	630	165
Energy (kcal/day)	low	b_high	CRCbiome_vOTU18092	-0.02634	0.114	0.8174	0.9623	630	76
Energy (kcal/day)	low	b_high	CRCbiome_vOTU02986	0.01501	0.07237	0.8357	0.9624	630	73
Energy (kcal/day)	low	b_high	CRCbiome_vOTU11521	0.01965	0.09556	0.8372	0.9631	630	82
Energy (kcal/day)	low	b_high	CRCbiome_vOTU15475	-0.01636	0.08065	0.8393	0.964	630	72
Energy (kcal/day)	low	b_high	CRCbiome_vOTU06383	0.0203	0.1048	0.8465	0.9663	630	97
Energy (kcal/day)	low	b_high	CRCbiome_vOTU04326	-0.0217	0.1349	0.8723	0.9666	630	93
Energy (kcal/day)	low	b_high	CRCbiome_vOTU06344	-0.02253	0.1263	0.8585	0.9666	630	175
Energy (kcal/day)	low	b_high	CRCbiome_vOTU00063	0.01588	0.1243	0.8983	0.9735	630	115
Energy (kcal/day)	low	b_high	CRCbiome_vOTU17956	0.0142	0.1068	0.8943	0.9735	630	87
Energy (kcal/day)	low	b_high	CRCbiome_vOTU14796	0.02219	0.1766	0.9001	0.9738	630	476
Energy (kcal/day)	low	b_high	CRCbiome_vOTU06201	0.01072	0.08817	0.9032	0.9763	630	69
Energy (kcal/day)	low	b_high	CRCbiome_vOTU12833	0.02282	0.1884	0.9036	0.9763	630	343
Energy (kcal/day)	low	b_high	CRCbiome_vOTU00156	-0.01269	0.117	0.9137	0.9776	630	65
Energy (kcal/day)	low	b_high	CRCbiome_vOTU05459	-0.007642	0.07033	0.9135	0.9776	630	67
Energy (kcal/day)	low	b_high	CRCbiome_vOTU07583	0.01806	0.1692	0.915	0.9782	630	415
Energy (kcal/day)	low	b_high	CRCbiome_vOTU09838	-0.01524	0.1541	0.9213	0.9782	630	443
Energy (kcal/day)	low	b_high	CRCbiome_vOTU15587	-0.01374	0.1427	0.9233	0.9784	630	180
Energy (kcal/day)	low	b_high	CRCbiome_vOTU17028	0.01317	0.1401	0.9251	0.9795	630	178
Energy (kcal/day)	low	b_high	CRCbiome_vOTU18294	0.01127	0.1209	0.9258	0.9795	630	149
Energy (kcal/day)	low	b_high	CRCbiome_vOTU18353	-0.01924	0.2074	0.9261	0.9795	630	442
Energy (kcal/day)	low	b_high	CRCbiome_vOTU15976	-0.009168	0.1087	0.9328	0.9834	630	72
Energy (kcal/day)	low	b_high	CRCbiome_vOTU06524	0.006734	0.1314	0.9591	0.9927	630	122
Energy (kcal/day)	low	b_high	CRCbiome_vOTU00014	0.004321	0.1505	0.9771	0.9933	630	465
Energy (kcal/day)	low	b_high	CRCbiome_vOTU18056	-0.002603	0.1224	0.983	0.9933	630	77
Fat (E%)	low	b_high	CRCbiome_vOTU03303	0.1961	0.08942	0.02865	0.5848	630	79
Fat (E%)	low	b_high	CRCbiome_vOTU16515	0.2151	0.09857	0.02947	0.5881	630	95
Fat (E%)	low	b_high	CRCbiome_vOTU00236	0.197	0.09209	0.03283	0.5929	630	81
Fat (E%)	low	b_high	CRCbiome_vOTU15035	0.252	0.1175	0.03234	0.5929	630	356
Fat (E%)	low	b_high	CRCbiome_vOTU17670	-0.2988	0.1398	0.03289	0.5929	630	142
Fat (E%)	low	b_high	CRCbiome_vOTU18353	-0.3657	0.1779	0.04023	0.616	630	430
Fat (E%)	low	b_high	CRCbiome_vOTU14013	0.2018	0.09873	0.04137	0.6219	630	145
Fat (E%)	low	b_high	CRCbiome_vOTU14796	0.3273	0.1606	0.04193	0.6223	630	475
Fat (E%)	low	b_high	CRCbiome_vOTU01238	0.1967	0.09724	0.04353	0.6239	630	92
Fat (E%)	low	b_high	CRCbiome_vOTU04186	0.1764	0.09203	0.0557	0.6533	630	80
Fat (E%)	low	b_high	CRCbiome_vOTU16923	-0.1861	0.09759	0.05698	0.6533	630	101
Fat (E%)	low	b_high	CRCbiome_vOTU00108	0.3437	0.1823	0.0598	0.6579	630	439
Fat (E%)	low	b_high	CRCbiome_vOTU00386	-0.1971	0.1051	0.0611	0.6579	630	80
Fat (E%)	low	b_high	CRCbiome_vOTU06779	0.281	0.1482	0.0584	0.6579	630	163
Fat (E%)	low	b_high	CRCbiome_vOTU12833	0.3236	0.173	0.0618	0.6585	630	341
Fat (E%)	low	b_high	CRCbiome_vOTU07624	0.2437	0.1313	0.06397	0.6587	630	361
Fat (E%)	low	b_high	CRCbiome_vOTU14163	-0.2463	0.1468	0.09383	0.6885	630	233
Fat (E%)	low	b_high	CRCbiome_vOTU16292	0.2539	0.1463	0.08307	0.6885	630	373
Fat (E%)	low	b_high	CRCbiome_vOTU18297	0.177	0.1019	0.08286	0.6885	630	105
Fat (E%)	low	b_high	CRCbiome_vOTU00156	-0.1704	0.1068	0.1113	0.7002	630	71
Fat (E%)	low	b_high	CRCbiome_vOTU08314	-0.2182	0.1406	0.1212	0.7163	630	181
Fat (E%)	low	b_high	CRCbiome_vOTU15587	0.2278	0.1477	0.1237	0.7176	630	171
Fat (E%)	low	b_high	CRCbiome_vOTU06695	0.1261	0.08257	0.1273	0.7197	630	72
Fat (E%)	low	b_high	CRCbiome_vOTU07167	0.1202	0.08069	0.1368	0.7253	630	78
Fat (E%)	low	b_high	CRCbiome_vOTU17028	0.2219	0.1482	0.1349	0.7253	630	164
Fat (E%)	low	b_high	CRCbiome_vOTU14990	-0.1659	0.1132	0.143	0.7357	630	134
Fat (E%)	low	b_high	CRCbiome_vOTU11186	0.1305	0.09196	0.1564	0.7608	630	71
Fat (E%)	low	b_high	CRCbiome_vOTU18494	0.1665	0.1204	0.1672	0.7803	630	131
Fat (E%)	low	b_high	CRCbiome_vOTU03890	0.1089	0.08162	0.1827	0.795	630	74
Fat (E%)	low	b_high	CRCbiome_vOTU06383	-0.1361	0.1008	0.1773	0.795	630	105
Fat (E%)	low	b_high	CRCbiome_vOTU00102	-0.1498	0.1152	0.1939	0.8018	630	121
Fat (E%)	low	b_high	CRCbiome_vOTU06206	0.1449	0.11	0.1882	0.8018	630	120
Fat (E%)	low	b_high	CRCbiome_vOTU06766	0.1591	0.1237	0.1989	0.8018	630	309
Fat (E%)	low	b_high	CRCbiome_vOTU06890	-0.1758	0.138	0.2031	0.8018	630	150
Fat (E%)	low	b_high	CRCbiome_vOTU18056	-0.1497	0.1205	0.2146	0.8018	630	90
Fat (E%)	low	b_high	CRCbiome_vOTU09395	0.08629	0.07077	0.2232	0.8114	630	68
Fat (E%)	low	b_high	CRCbiome_vOTU06837	-0.1082	0.08963	0.2277	0.8169	630	71
Fat (E%)	low	b_high	CRCbiome_vOTU10475	0.1582	0.1341	0.2386	0.8285	630	118
Fat (E%)	low	b_high	CRCbiome_vOTU18047	-0.09003	0.07676	0.2413	0.8325	630	70
Fat (E%)	low	b_high	CRCbiome_vOTU14742	-0.1673	0.145	0.2489	0.8347	630	202
Fat (E%)	low	b_high	CRCbiome_vOTU08908	-0.09496	0.08341	0.2554	0.8383	630	75
Fat (E%)	low	b_high	CRCbiome_vOTU04840	0.08421	0.07444	0.2584	0.8448	630	107
Fat (E%)	low	b_high	CRCbiome_vOTU12609	-0.1943	0.1786	0.277	0.845	630	409
Fat (E%)	low	b_high	CRCbiome_vOTU13264	0.09926	0.09433	0.2931	0.845	630	65
Fat (E%)	low	b_high	CRCbiome_vOTU17495	0.1366	0.1223	0.2643	0.845	630	123
Fat (E%)	low	b_high	CRCbiome_vOTU18341	0.08219	0.0736	0.2646	0.845	630	74
Fat (E%)	low	b_high	CRCbiome_vOTU16067	0.06464	0.06301	0.3054	0.8477	630	68
Fat (E%)	low	b_high	CRCbiome_vOTU10907	0.1436	0.1443	0.3197	0.8597	630	203
Fat (E%)	low	b_high	CRCbiome_vOTU16360	0.1369	0.1429	0.3381	0.8605	630	259
Fat (E%)	low	b_high	CRCbiome_vOTU16433	0.06318	0.06532	0.3338	0.8605	630	67
Fat (E%)	low	b_high	CRCbiome_vOTU02518	0.1477	0.1563	0.345	0.862	630	318
Fat (E%)	low	b_high	CRCbiome_vOTU17901	0.08804	0.09334	0.3459	0.862	630	88
Fat (E%)	low	b_high	CRCbiome_vOTU09493	-0.08962	0.09729	0.3573	0.8633	630	112
Fat (E%)	low	b_high	CRCbiome_vOTU00912	0.1271	0.1405	0.3663	0.8647	630	235
Fat (E%)	low	b_high	CRCbiome_vOTU06201	-0.06768	0.07492	0.3667	0.8647	630	64
Fat (E%)	low	b_high	CRCbiome_vOTU06193	0.1737	0.202	0.3902	0.8744	630	361
Fat (E%)	low	b_high	CRCbiome_vOTU00409	0.07763	0.09104	0.3942	0.8782	630	90
Fat (E%)	low	b_high	CRCbiome_vOTU10262	0.1287	0.1523	0.3984	0.8827	630	251
Fat (E%)	low	b_high	CRCbiome_vOTU18455	-0.08553	0.1024	0.4038	0.8869	630	74
Fat (E%)	low	b_high	CRCbiome_vOTU06365	0.1197	0.1484	0.4203	0.8876	630	538
Fat (E%)	low	b_high	CRCbiome_vOTU06510	0.05645	0.07276	0.4381	0.8876	630	68
Fat (E%)	low	b_high	CRCbiome_vOTU17445	0.1075	0.1368	0.432	0.8876	630	290
Fat (E%)	low	b_high	CRCbiome_vOTU14017	0.07865	0.1045	0.452	0.8891	630	102
Fat (E%)	low	b_high	CRCbiome_vOTU06460	-0.06141	0.08218	0.4552	0.8893	630	101
Fat (E%)	low	b_high	CRCbiome_vOTU07544	0.07861	0.1052	0.455	0.8893	630	70
Fat (E%)	low	b_high	CRCbiome_vOTU07583	0.09817	0.1325	0.4591	0.8911	630	423
Fat (E%)	low	b_high	CRCbiome_vOTU16948	0.1009	0.139	0.4681	0.8948	630	533
Fat (E%)	low	b_high	CRCbiome_vOTU00300	0.09198	0.1293	0.4773	0.8998	630	79
Fat (E%)	low	b_high	CRCbiome_vOTU06961	-0.1081	0.1534	0.481	0.9017	630	156
Fat (E%)	low	b_high	CRCbiome_vOTU00071	-0.07717	0.1108	0.4864	0.902	630	80
Fat (E%)	low	b_high	CRCbiome_vOTU18200	-0.05201	0.07435	0.4845	0.902	630	67
Fat (E%)	low	b_high	CRCbiome_vOTU05224	0.05805	0.08507	0.4953	0.9054	630	72
Fat (E%)	low	b_high	CRCbiome_vOTU08262	-0.05795	0.08498	0.4956	0.9054	630	79
Fat (E%)	low	b_high	CRCbiome_vOTU06261	-0.06501	0.09715	0.5036	0.9098	630	90
Fat (E%)	low	b_high	CRCbiome_vOTU07538	-0.08362	0.129	0.517	0.9175	630	98
Fat (E%)	low	b_high	CRCbiome_vOTU06277	0.09321	0.1443	0.5186	0.9178	630	251
Fat (E%)	low	b_high	CRCbiome_vOTU00279	-0.05311	0.08458	0.5303	0.918	630	80
Fat (E%)	low	b_high	CRCbiome_vOTU01802	-0.05486	0.09336	0.557	0.918	630	89
Fat (E%)	low	b_high	CRCbiome_vOTU06250	0.07588	0.1196	0.5261	0.918	630	155
Fat (E%)	low	b_high	CRCbiome_vOTU07146	-0.05087	0.08736	0.5606	0.918	630	73
Fat (E%)	low	b_high	CRCbiome_vOTU08913	0.04926	0.08171	0.5468	0.918	630	96
Fat (E%)	low	b_high	CRCbiome_vOTU11150	-0.07781	0.1249	0.5336	0.918	630	98
Fat (E%)	low	b_high	CRCbiome_vOTU13168	-0.07424	0.121	0.5396	0.918	630	119
Fat (E%)	low	b_high	CRCbiome_vOTU18323	-0.0694	0.1179	0.5565	0.918	630	90
Fat (E%)	low	b_high	CRCbiome_vOTU11017	0.06984	0.1233	0.5714	0.9218	630	195
Fat (E%)	low	b_high	CRCbiome_vOTU01854	0.06779	0.1329	0.6101	0.9294	630	364
Fat (E%)	low	b_high	CRCbiome_vOTU02714	-0.06101	0.1179	0.6051	0.9294	630	92
Fat (E%)	low	b_high	CRCbiome_vOTU05990	-0.06175	0.1164	0.5961	0.9294	630	104
Fat (E%)	low	b_high	CRCbiome_vOTU06243	0.05582	0.1069	0.6017	0.9294	630	67
Fat (E%)	low	b_high	CRCbiome_vOTU12720	0.04821	0.09503	0.6121	0.9294	630	76
Fat (E%)	low	b_high	CRCbiome_vOTU13928	0.06463	0.1236	0.6011	0.9294	630	181
Fat (E%)	low	b_high	CRCbiome_vOTU14650	-0.0978	0.1934	0.6132	0.9294	630	292
Fat (E%)	low	b_high	CRCbiome_vOTU16396	0.04589	0.09107	0.6145	0.9294	630	75
Fat (E%)	low	b_high	CRCbiome_vOTU08771	-0.05499	0.1115	0.6221	0.9331	630	96
Fat (E%)	low	b_high	CRCbiome_vOTU11521	-0.03986	0.08056	0.6209	0.9331	630	69
Fat (E%)	low	b_high	CRCbiome_vOTU16764	-0.05415	0.1131	0.6323	0.936	630	162
Fat (E%)	low	b_high	CRCbiome_vOTU00680	0.04494	0.09765	0.6455	0.9384	630	92
Fat (E%)	low	b_high	CRCbiome_vOTU02986	-0.02999	0.07117	0.6736	0.9384	630	69
Fat (E%)	low	b_high	CRCbiome_vOTU04991	0.0387	0.09148	0.6724	0.9384	630	103
Fat (E%)	low	b_high	CRCbiome_vOTU05693	-0.08757	0.1889	0.6432	0.9384	630	381
Fat (E%)	low	b_high	CRCbiome_vOTU11258	-0.05421	0.1298	0.6764	0.9384	630	139
Fat (E%)	low	b_high	CRCbiome_vOTU13666	0.05037	0.1183	0.6703	0.9384	630	245
Fat (E%)	low	b_high	CRCbiome_vOTU15976	-0.04835	0.1089	0.6572	0.9384	630	83
Fat (E%)	low	b_high	CRCbiome_vOTU18045	-0.06101	0.1415	0.6666	0.9384	630	154
Fat (E%)	low	b_high	CRCbiome_vOTU08025	0.04461	0.1102	0.6857	0.94	630	66
Fat (E%)	low	b_high	CRCbiome_vOTU06407	-0.06423	0.1623	0.6925	0.9406	630	186
Fat (E%)	low	b_high	CRCbiome_vOTU06625	-0.06214	0.1582	0.6946	0.9406	630	189
Fat (E%)	low	b_high	CRCbiome_vOTU14720	0.05032	0.1275	0.6933	0.9406	630	235
Fat (E%)	low	b_high	CRCbiome_vOTU06524	0.04555	0.1202	0.7047	0.9447	630	123
Fat (E%)	low	b_high	CRCbiome_vOTU09838	0.05216	0.1378	0.7052	0.9447	630	458
Fat (E%)	low	b_high	CRCbiome_vOTU07549	0.02905	0.07808	0.71	0.9457	630	74
Fat (E%)	low	b_high	CRCbiome_vOTU14802	0.03615	0.09745	0.7108	0.9457	630	110
Fat (E%)	low	b_high	CRCbiome_vOTU00063	-0.03979	0.1132	0.7254	0.9504	630	123
Fat (E%)	low	b_high	CRCbiome_vOTU05594	0.0343	0.098	0.7264	0.9504	630	94
Fat (E%)	low	b_high	CRCbiome_vOTU05051	0.03406	0.1001	0.7338	0.9522	630	95
Fat (E%)	low	b_high	CRCbiome_vOTU17423	0.03355	0.1035	0.7458	0.9572	630	107
Fat (E%)	low	b_high	CRCbiome_vOTU06136	-0.02718	0.08466	0.7483	0.9573	630	69
Fat (E%)	low	b_high	CRCbiome_vOTU00014	0.04068	0.1375	0.7674	0.9577	630	475
Fat (E%)	low	b_high	CRCbiome_vOTU00335	0.04558	0.145	0.7534	0.9577	630	262
Fat (E%)	low	b_high	CRCbiome_vOTU05728	-0.02573	0.085	0.7622	0.9577	630	69
Fat (E%)	low	b_high	CRCbiome_vOTU09503	-0.04448	0.1439	0.7574	0.9577	630	342
Fat (E%)	low	b_high	CRCbiome_vOTU18478	0.03687	0.1188	0.7563	0.9577	630	321
Fat (E%)	low	b_high	CRCbiome_vOTU14617	-0.03416	0.1224	0.7802	0.9598	630	136
Fat (E%)	low	b_high	CRCbiome_vOTU00012	0.02896	0.1297	0.8235	0.9611	630	230
Fat (E%)	low	b_high	CRCbiome_vOTU00088	-0.02065	0.08303	0.8037	0.9611	630	64
Fat (E%)	low	b_high	CRCbiome_vOTU00307	0.02792	0.1065	0.7933	0.9611	630	134
Fat (E%)	low	b_high	CRCbiome_vOTU02333	0.03604	0.148	0.8077	0.9611	630	159
Fat (E%)	low	b_high	CRCbiome_vOTU06796	0.02427	0.09024	0.788	0.9611	630	84
Fat (E%)	low	b_high	CRCbiome_vOTU07547	-0.03656	0.171	0.8308	0.9611	630	164
Fat (E%)	low	b_high	CRCbiome_vOTU15475	0.021329999999999998	0.07783	0.7841	0.9611	630	68
Fat (E%)	low	b_high	CRCbiome_vOTU18294	-0.03587	0.1441	0.8036	0.9611	630	156
Fat (E%)	low	b_high	CRCbiome_vOTU16623	0.01627	0.07701	0.8327	0.9615	630	92
Fat (E%)	low	b_high	CRCbiome_vOTU14044	0.02637	0.131	0.8406	0.9649	630	160
Fat (E%)	low	b_high	CRCbiome_vOTU18092	0.01979	0.1012	0.8451	0.968	630	72
Fat (E%)	low	b_high	CRCbiome_vOTU06476	-0.03053	0.1623	0.8508	0.9691	630	110
Fat (E%)	low	b_high	CRCbiome_vOTU07352	0.02628	0.1475	0.8586	0.9703	630	232
Fat (E%)	low	b_high	CRCbiome_vOTU11327	-0.02369	0.1376	0.8634	0.9717	630	326
Fat (E%)	low	b_high	CRCbiome_vOTU16915	-0.02227	0.1282	0.8621	0.9717	630	71
Fat (E%)	low	b_high	CRCbiome_vOTU00579	-0.01874	0.1138	0.8692	0.972	630	130
Fat (E%)	low	b_high	CRCbiome_vOTU04326	-0.01975	0.1217	0.8712	0.972	630	95
Fat (E%)	low	b_high	CRCbiome_vOTU16284	0.01604	0.09455	0.8654	0.972	630	111
Fat (E%)	low	b_high	CRCbiome_vOTU06847	-0.01851	0.1318	0.8883	0.9765	630	345
Fat (E%)	low	b_high	CRCbiome_vOTU00018	0.02391	0.1847	0.8971	0.9812	630	191
Fat (E%)	low	b_high	CRCbiome_vOTU09914	-0.0226	0.1785	0.8993	0.9812	630	315
Fat (E%)	low	b_high	CRCbiome_vOTU00113	-0.01535	0.1297	0.9058	0.9835	630	222
Fat (E%)	low	b_high	CRCbiome_vOTU00738	-0.01368	0.1196	0.909	0.9835	630	84
Fat (E%)	low	b_high	CRCbiome_vOTU06949	-0.01555	0.1402	0.9118	0.9835	630	273
Fat (E%)	low	b_high	CRCbiome_vOTU07437	-0.01186	0.1069	0.9117	0.9835	630	111
Fat (E%)	low	b_high	CRCbiome_vOTU18008	-0.01236	0.1043	0.9057	0.9835	630	70
Fat (E%)	low	b_high	CRCbiome_vOTU17283	-0.008547	0.08938	0.9238	0.9844	630	103
Fat (E%)	low	b_high	CRCbiome_vOTU06344	-0.009259	0.1151	0.9359	0.9883	630	173
Fat (E%)	low	b_high	CRCbiome_vOTU05459	-0.007277	0.1008	0.9425	0.9886	630	68
Fat (E%)	low	b_high	CRCbiome_vOTU00076	0.009902	0.1718	0.9541	0.9917	630	264
Fat (E%)	low	b_high	CRCbiome_vOTU05899	0.003726	0.1142	0.974	0.9946	630	103
Fat (E%)	low	b_high	CRCbiome_vOTU07045	0.002668	0.08122	0.9738	0.9946	630	92
Fat (E%)	low	b_high	CRCbiome_vOTU17956	-0.002865	0.09381	0.9756	0.995	630	82
Fat (E%)	low	b_high	CRCbiome_vOTU00495	0.002264	0.09223	0.9804	0.9956	630	78
Fat (E%)	low	b_high	CRCbiome_vOTU04155	8.543e-4	0.1051	0.9935	0.9981	630	92
Fat (E%)	low	b_high	CRCbiome_vOTU06147	9.689e-4	0.07859	0.9902	0.9981	630	66
Fat (E%)	low	b_high	CRCbiome_vOTU10713	-3.626e-4	0.09868	0.9971	0.9992	630	119
Fiber (g/day)	low	b_high	CRCbiome_vOTU05693	0.9774	0.1874	2.506e-7	2.494e-4	634	394
Fiber (g/day)	low	b_high	CRCbiome_vOTU12609	0.8312	0.177	3.254e-6	0.001928	634	418
Fiber (g/day)	low	b_high	CRCbiome_vOTU16292	0.5033	0.1436	4.876e-4	0.07223	634	385
Fiber (g/day)	low	b_high	CRCbiome_vOTU14742	-0.515	0.1584	0.001207	0.1244	634	209
Fiber (g/day)	low	b_high	CRCbiome_vOTU13666	0.3864	0.126	0.00226	0.1847	634	240
Fiber (g/day)	low	b_high	CRCbiome_vOTU02518	0.4534	0.1543	0.003414	0.1882	634	327
Fiber (g/day)	low	b_high	CRCbiome_vOTU10637	0.2412	0.08199	0.003376	0.1882	634	66
Fiber (g/day)	low	b_high	CRCbiome_vOTU00912	-0.4263	0.152	0.005184	0.2087	634	240
Fiber (g/day)	low	b_high	CRCbiome_vOTU00279	0.2267	0.08138	0.005513	0.2097	634	79
Fiber (g/day)	low	b_high	CRCbiome_vOTU08771	-0.3034	0.1091	0.005573	0.2097	634	92
Fiber (g/day)	low	b_high	CRCbiome_vOTU16515	0.268	0.09934	0.007165	0.2326	634	93
Fiber (g/day)	low	b_high	CRCbiome_vOTU17901	-0.2641	0.09852	0.007545	0.2416	634	100
Fiber (g/day)	low	b_high	CRCbiome_vOTU00680	-0.2603	0.1006	0.009901	0.2685	634	90
Fiber (g/day)	low	b_high	CRCbiome_vOTU14044	-0.3855	0.1532	0.01211	0.2706	634	176
Fiber (g/day)	low	b_high	CRCbiome_vOTU17445	0.3372	0.1365	0.01377	0.2814	634	296
Fiber (g/day)	low	b_high	CRCbiome_vOTU08314	-0.3161	0.1295	0.01495	0.2924	634	179
Fiber (g/day)	low	b_high	CRCbiome_vOTU08410	0.1593	0.06541	0.01518	0.2924	634	67
Fiber (g/day)	low	b_high	CRCbiome_vOTU08908	0.1851	0.08107	0.02277	0.355	634	72
Fiber (g/day)	low	b_high	CRCbiome_vOTU02714	-0.2503	0.1106	0.02397	0.3665	634	97
Fiber (g/day)	low	b_high	CRCbiome_vOTU06407	-0.369	0.1666	0.02715	0.3807	634	191
Fiber (g/day)	low	b_high	CRCbiome_vOTU16433	-0.1728	0.07782	0.02676	0.3807	634	81
Fiber (g/day)	low	b_high	CRCbiome_vOTU14720	0.2736	0.126	0.03033	0.3965	634	227
Fiber (g/day)	low	b_high	CRCbiome_vOTU14990	-0.2375	0.1103	0.0316	0.3965	634	136
Fiber (g/day)	low	b_high	CRCbiome_vOTU07352	-0.3091	0.1461	0.03475	0.4055	634	233
Fiber (g/day)	low	b_high	CRCbiome_vOTU01854	0.2707	0.1298	0.03743	0.4094	634	377
Fiber (g/day)	low	b_high	CRCbiome_vOTU18323	-0.2157	0.1065	0.04324	0.4279	634	96
Fiber (g/day)	low	b_high	CRCbiome_vOTU18455	-0.2061	0.1023	0.0443	0.4297	634	71
Fiber (g/day)	low	b_high	CRCbiome_vOTU17495	0.2021	0.1006	0.04499	0.4307	634	107
Fiber (g/day)	low	b_high	CRCbiome_vOTU14617	-0.2357	0.121	0.05183	0.4601	634	135
Fiber (g/day)	low	b_high	CRCbiome_vOTU16923	-0.2139	0.1115	0.05559	0.4705	634	116
Fiber (g/day)	low	b_high	CRCbiome_vOTU18056	0.2165	0.1164	0.06329	0.4885	634	78
Fiber (g/day)	low	b_high	CRCbiome_vOTU12720	0.1649	0.08963	0.06634	0.4959	634	69
Fiber (g/day)	low	b_high	CRCbiome_vOTU18494	0.2016	0.1118	0.07177	0.5136	634	127
Fiber (g/day)	low	b_high	CRCbiome_vOTU18478	0.2297	0.1288	0.07503	0.5184	634	317
Fiber (g/day)	low	b_high	CRCbiome_vOTU09395	0.1232	0.07017	0.0797	0.5375	634	67
Fiber (g/day)	low	b_high	CRCbiome_vOTU02333	-0.2537	0.1451	0.08085	0.5398	634	145
Fiber (g/day)	low	b_high	CRCbiome_vOTU08025	0.1368	0.079	0.08374	0.5467	634	64
Fiber (g/day)	low	b_high	CRCbiome_vOTU05224	0.1489	0.08641	0.08539	0.5471	634	69
Fiber (g/day)	low	b_high	CRCbiome_vOTU00738	0.1191	0.06929	0.08628	0.5484	634	87
Fiber (g/day)	low	b_high	CRCbiome_vOTU06890	-0.2288	0.1337	0.08747	0.5484	634	145
Fiber (g/day)	low	b_high	CRCbiome_vOTU13928	0.2132	0.1259	0.09102	0.5489	634	189
Fiber (g/day)	low	b_high	CRCbiome_vOTU01238	-0.1573	0.09309	0.09162	0.5511	634	85
Fiber (g/day)	low	b_high	CRCbiome_vOTU06344	-0.1879	0.1127	0.09617	0.5614	634	184
Fiber (g/day)	low	b_high	CRCbiome_vOTU06779	-0.2702	0.1618	0.09557	0.5614	634	154
Fiber (g/day)	low	b_high	CRCbiome_vOTU06476	-0.256	0.158	0.1057	0.5798	634	105
Fiber (g/day)	low	b_high	CRCbiome_vOTU00076	0.2619	0.1642	0.1112	0.5811	634	282
Fiber (g/day)	low	b_high	CRCbiome_vOTU11521	0.1263	0.08103	0.1195	0.596	634	82
Fiber (g/day)	low	b_high	CRCbiome_vOTU00579	-0.1557	0.1088	0.15310000000000001	0.6633	634	128
Fiber (g/day)	low	b_high	CRCbiome_vOTU05051	-0.1374	0.096	0.153	0.6633	634	88
Fiber (g/day)	low	b_high	CRCbiome_vOTU00300	0.1841	0.1301	0.1576	0.6652	634	82
Fiber (g/day)	low	b_high	CRCbiome_vOTU02986	0.0974	0.06892	0.158	0.6652	634	72
Fiber (g/day)	low	b_high	CRCbiome_vOTU11327	-0.1929	0.1362	0.1572	0.6652	634	324
Fiber (g/day)	low	b_high	CRCbiome_vOTU16623	0.1158	0.08207	0.1589	0.6652	634	101
Fiber (g/day)	low	b_high	CRCbiome_vOTU06206	0.1469	0.1071	0.171	0.6781	634	106
Fiber (g/day)	low	b_high	CRCbiome_vOTU00102	-0.1792	0.1324	0.1766	0.6885	634	136
Fiber (g/day)	low	b_high	CRCbiome_vOTU00553	-0.1344	0.1029	0.192	0.7077	634	64
Fiber (g/day)	low	b_high	CRCbiome_vOTU06766	-0.1616	0.1243	0.194	0.7087	634	307
Fiber (g/day)	low	b_high	CRCbiome_vOTU10713	0.1301	0.1015	0.2004	0.7142	634	127
Fiber (g/day)	low	b_high	CRCbiome_vOTU10262	-0.198	0.1576	0.2093	0.7201	634	265
Fiber (g/day)	low	b_high	CRCbiome_vOTU03890	-0.09283	0.07778	0.2331	0.7397	634	67
Fiber (g/day)	low	b_high	CRCbiome_vOTU07549	0.09571	0.08045	0.2346	0.7397	634	81
Fiber (g/day)	low	b_high	CRCbiome_vOTU10475	0.152	0.1256	0.2264	0.7397	634	100
Fiber (g/day)	low	b_high	CRCbiome_vOTU10907	-0.1763	0.1508	0.2426	0.7397	634	210
Fiber (g/day)	low	b_high	CRCbiome_vOTU18341	-0.08921	0.07462	0.2323	0.7397	634	73
Fiber (g/day)	low	b_high	CRCbiome_vOTU06847	-0.1542	0.1347	0.2529	0.746	634	340
Fiber (g/day)	low	b_high	CRCbiome_vOTU06949	-0.1589	0.1384	0.2515	0.746	634	286
Fiber (g/day)	low	b_high	CRCbiome_vOTU00012	-0.1499	0.1313	0.2539	0.7462	634	234
Fiber (g/day)	low	b_high	CRCbiome_vOTU00113	0.1539	0.135	0.2548	0.7462	634	235
Fiber (g/day)	low	b_high	CRCbiome_vOTU05728	-0.1009	0.08912	0.2582	0.7462	634	79
Fiber (g/day)	low	b_high	CRCbiome_vOTU11017	0.1485	0.1329	0.2642	0.7462	634	185
Fiber (g/day)	low	b_high	CRCbiome_vOTU11150	0.1452	0.1287	0.2595	0.7462	634	107
Fiber (g/day)	low	b_high	CRCbiome_vOTU06625	-0.1743	0.1574	0.2684	0.7492	634	185
Fiber (g/day)	low	b_high	CRCbiome_vOTU00160	0.06736	0.06307	0.2859	0.7578	634	66
Fiber (g/day)	low	b_high	CRCbiome_vOTU06383	-0.1096	0.1029	0.2873	0.7578	634	120
Fiber (g/day)	low	b_high	CRCbiome_vOTU11186	-0.09728	0.09086	0.2848	0.7578	634	69
Fiber (g/day)	low	b_high	CRCbiome_vOTU14017	0.1191	0.1105	0.2817	0.7578	634	110
Fiber (g/day)	low	b_high	CRCbiome_vOTU14802	0.09112	0.0857	0.2881	0.7578	634	109
Fiber (g/day)	low	b_high	CRCbiome_vOTU06365	-0.1557	0.1499	0.2994	0.7614	634	533
Fiber (g/day)	low	b_high	CRCbiome_vOTU17956	-0.09972	0.09618	0.3002	0.7614	634	87
Fiber (g/day)	low	b_high	CRCbiome_vOTU06197	0.06895	0.06827	0.3129	0.7725	634	70
Fiber (g/day)	low	b_high	CRCbiome_vOTU04186	-0.08946	0.0936	0.3395	0.7942	634	82
Fiber (g/day)	low	b_high	CRCbiome_vOTU18047	0.06869	0.07256	0.3441	0.7957	634	64
Fiber (g/day)	low	b_high	CRCbiome_vOTU07437	-0.09018	0.09583	0.3471	0.7965	634	91
Fiber (g/day)	low	b_high	CRCbiome_vOTU00063	0.1019	0.1095	0.3528	0.7968	634	112
Fiber (g/day)	low	b_high	CRCbiome_vOTU18297	-0.09602	0.1044	0.3579	0.7987	634	106
Fiber (g/day)	low	b_high	CRCbiome_vOTU16284	0.08402	0.09139	0.3583	0.7988	634	112
Fiber (g/day)	low	b_high	CRCbiome_vOTU16396	-0.08473	0.09267	0.3609	0.8002	634	78
Fiber (g/day)	low	b_high	CRCbiome_vOTU14650	-0.1725	0.192	0.3692	0.8054	634	281
Fiber (g/day)	low	b_high	CRCbiome_vOTU18294	-0.09793	0.1105	0.3759	0.81	634	144
Fiber (g/day)	low	b_high	CRCbiome_vOTU18045	-0.1243	0.1427	0.3839	0.8104	634	165
Fiber (g/day)	low	b_high	CRCbiome_vOTU06193	-0.1727	0.2024	0.3939	0.8132	634	346
Fiber (g/day)	low	b_high	CRCbiome_vOTU11258	-0.1052	0.1255	0.4021	0.8219	634	133
Fiber (g/day)	low	b_high	CRCbiome_vOTU00307	0.08043	0.09859	0.4149	0.8256	634	133
Fiber (g/day)	low	b_high	CRCbiome_vOTU04840	-0.05832	0.07163	0.4158	0.8256	634	98
Fiber (g/day)	low	b_high	CRCbiome_vOTU05899	-0.09489	0.1225	0.4387	0.8358	634	91
Fiber (g/day)	low	b_high	CRCbiome_vOTU08913	-0.06422	0.08578	0.4543	0.841	634	99
Fiber (g/day)	low	b_high	CRCbiome_vOTU00018	0.1386	0.1873	0.4597	0.8445	634	190
Fiber (g/day)	low	b_high	CRCbiome_vOTU06695	0.07117	0.09845	0.47	0.8474	634	80
Fiber (g/day)	low	b_high	CRCbiome_vOTU06243	0.05858	0.08211	0.4759	0.8505	634	78
Fiber (g/day)	low	b_high	CRCbiome_vOTU18200	0.05067	0.0717	0.48	0.8534	634	64
Fiber (g/day)	low	b_high	CRCbiome_vOTU09914	-0.1261	0.1814	0.4875	0.8588	634	317
Fiber (g/day)	low	b_high	CRCbiome_vOTU16948	-0.09544	0.1398	0.4952	0.8604	634	531
Fiber (g/day)	low	b_high	CRCbiome_vOTU00185	-0.05565	0.08501	0.5129	0.8649	634	66
Fiber (g/day)	low	b_high	CRCbiome_vOTU09503	-0.09185	0.1445	0.5251	0.8686	634	348
Fiber (g/day)	low	b_high	CRCbiome_vOTU09838	-0.08715	0.1401	0.5342	0.8686	634	450
Fiber (g/day)	low	b_high	CRCbiome_vOTU11362	-0.05134	0.082	0.5315	0.8686	634	78
Fiber (g/day)	low	b_high	CRCbiome_vOTU17283	-0.05755	0.09218	0.5326	0.8686	634	111
Fiber (g/day)	low	b_high	CRCbiome_vOTU15475	0.03648	0.05921	0.538	0.8704	634	64
Fiber (g/day)	low	b_high	CRCbiome_vOTU05594	-0.05667	0.09665	0.5578	0.8807	634	92
Fiber (g/day)	low	b_high	CRCbiome_vOTU17423	-0.05922	0.1028	0.565	0.8828	634	102
[truncated: 2,422 more rows]
